# Supplementary material
Source: Copernicus journal article supplement (doi:10.5194/egusphere-2026-3391)
Supplement: Supplementary file 1 [file egusphere-2026-3391-supplement.pdf]

## Supplement S1: Kinetic constant calculation using SAR method

Jenkin et al. (2018) defined the reaction rate of the OH-addition to an aromatic ring  $k_{addition}$  as the sum of all partial rate coefficients corresponding to each carbon on the ring.

$$k_{addition} = \sum_{i=1}^6 k_{part,i} \quad (S1)$$

where the partial rate coefficient  $k_{part,i}$  can be expressed as:

$$k_{part,i} = k_i F_i(\phi) R_i(\phi) \quad (S2)$$

where  $k_i$  ( $\text{cm}^3 \text{ molecules}^{-1} \text{ s}^{-1}$ ) is the partial rate coefficient depending on the substitution of the considered carbon,  $F_i(\phi)$  is a factor dependent on the neighboring carbons substituted and  $R_i(\phi)$  is a factor correcting  $F_i(\phi)$  depending on the nature of the substituents. In the following section, the calculation of the trihydroxybenzene hydroxylation kinetic is considered to illustrate the method.

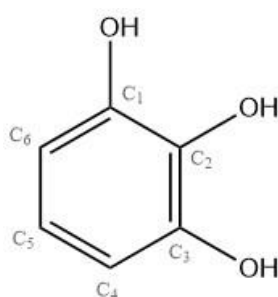

Figure S1: trihydroxybenzene structure.

The values for the parameters  $F_i(\phi)$ ,  $R_i(\phi)$  and  $k_i$  mentioned above are available in Jenkin et al. (2018). Using trihydroxybenzene as an example, the following values are used for the calculations:

Table S1:  $k_i$  values at 298K depending on the carbon  $i$  substitution

| substitution  | name         | value ( $\text{cm}^3 \text{ molecules}^{-1} \text{ s}^{-1}$ ) |
|---------------|--------------|---------------------------------------------------------------|
| unsubstituted | $k_{i,arom}$ | $2.0 \times 10^{-13}$                                         |
| substituted   | $k_{i,ipso}$ | $2.8 \times 10^{-13}$                                         |

The position of the three neighboring hydroxyl groups must be determined for each carbon in order to use the correct value for  $F_i(\phi)$  and  $R_i(\phi)$ .

Table S2 :  $F(\phi)$  values depending on the position of the neighboring substituted carbons and  $R(\phi)$  values for each neighboring OH-substituted carbon with a temperature of 298 K.

| $F(\phi)$             | value | $R(\phi)$ | value |
|-----------------------|-------|-----------|-------|
| F (ortho, ortho)      | 10.5  | R(ortho)  | 2.6   |
| F (ortho, meta)       | 34.0  | R(para)   | 2.6   |
| F (ortho, meta, para) | 28.0  | R(meta)   | 2.4   |
| F (meta, meta, para)  | 11.0  | R(ipso)   | 2.4   |

Table S3: Description of trihydroxybenzene carbons substitution and calculation of partial kinetic constants. In the description of the substitution  $\phi$ , i stands for ipso, o for ortho, m for meta and p for para.

|              |                       |                       |                       |                       |                       |                       |
|--------------|-----------------------|-----------------------|-----------------------|-----------------------|-----------------------|-----------------------|
| Carbon ID    | C1                    | C1                    | C1                    | C1                    | C1                    | C1                    |
| Substitution | OH                    | OH                    | OH                    | -                     | -                     | -                     |
| $k_i$        | $k_{ipso}$            | $k_{ipso}$            | $k_{ipso}$            | $k_{arom}$            | $k_{arom}$            | $k_{arom}$            |
| $\phi$       | i, o, m               | i, o, o               | i, o, m               | o, m, p               | m, m, p               | o, m, p               |
| $k_{part,i}$ | $4.4 \times 10^{-11}$ | $1.5 \times 10^{-10}$ | $4.4 \times 10^{-11}$ | $9.1 \times 10^{-11}$ | $3.3 \times 10^{-11}$ | $9.1 \times 10^{-11}$ |

The sum of all six partial coefficients results in  $k_{addition} = 4.58 \times 10^{-10} \text{ cm}^3 \text{ molecules}^{-1} \text{ s}^{-1}$ . To compare, the value given by GECKOA for the hydroxylation rate constant of trihydroxybenzene is  $k_{add,GECKOA} = 4.65 \times 10^{-10} \text{ cm}^3 \text{ molecules}^{-1} \text{ s}^{-1}$ .

## Supplement S2: Mech 2 – reactions

| reaction number | reaction                                                                                                                   | kinetics                           |
|-----------------|----------------------------------------------------------------------------------------------------------------------------|------------------------------------|
| 1               | HOCH2CHO + OH -> 8.000E-01 HOCH2CO3 + 2.000E-01 GLY + 2.000E-01 HO2                                                        | ARR 1.000E-11 0 0                  |
| 2               | HOCH2CHO -> CO + HCHO + 2.000E+00 HO2                                                                                      | EXTRA 91 2.792E-05 0.805 0.338 1.0 |
| 3               | HOCH2CHO + NO3 -> HNO3 + HOCH2CO3                                                                                          | ARR 1.400E-12 0 1860.00            |
| 4               | HOCH2CO3 + NO2 -> PHAN                                                                                                     | EXTRA 93 21 1.0                    |
| 5               | HOCH2CO3 + NO -> HCHO + HO2 + NO2                                                                                          | ARR 7.500E-12 0 -290.00            |
| 6               | HOCH2CO3 + NO3 -> HCHO + HO2 + NO2                                                                                         | ARR 4.002E-12 0 0                  |
| 7               | HOCH2CO3 + HO2 -> 4.100E-01 HOCH2CO3H + 1.500E-01 HOCH2CO2H + 1.500E-01 O3 + 4.400E-01 HCHO + 4.400E-01 HO2 + 4.400E-01 OH | ARR 5.200E-13 0 -980.00            |
| 8               | HOCH2CO3 -> 7.000E-01 HCHO + 7.000E-01 HO2 + 3.000E-01 HOCH2CO2H                                                           | RO2 1 ARR 1.000E-11 0 0            |
| 9               | PHAN -> HOCH2CO3 + NO2                                                                                                     | EXTRA 93 22 1.0                    |
| 10              | PHAN + OH -> CO + HCHO + NO2                                                                                               | ARR 1.120E-12 0 0                  |
| 11              | HOCH2CO2H + OH -> HCHO + HO2                                                                                               | ARR 2.730E-12 0 0                  |
| 12              | HOCH2CO3H -> HCHO + HO2 + OH                                                                                               | EXTRA 91 7.649E-06 0.682 0.279 1.0 |
| 13              | HOCH2CO3H + OH -> HOCH2CO3                                                                                                 | ARR 6.190E-12 0 0                  |
| 14              | GLYOOA -> 1.800E-01 GLYOO + 1.265E+00 CO + 8.200E-01 HO2 + 5.700E-01 OH + 1.250E-01 HCHO                                   | ARR 1.000E+06 0 0                  |
| 15              | HCOCO3 + NO -> CO + HO2 + NO2                                                                                              | ARR 7.500E-12 0 -290.00            |
| 16              | HCOCO3 + NO2 -> CO + HO2 + NO3                                                                                             | EXTRA 93 21 1.0                    |
| 17              | HCOCO3 + NO3 -> CO + HO2 + NO2                                                                                             | ARR 4.002E-12 0 0                  |
| 18              | HCOCO3 + HO2 -> 4.100E-01 HCOCO3H + 1.500E-01 HCOCO2H + 1.500E-01 O3 + 4.400E-01 CO + 4.400E-01 HO2 + 4.400E-01 OH         | ARR 5.200E-13 0 -980.00            |
| 19              | HCOCO3 -> 7.000E-01 CO + 7.000E-01 HO2 + 3.000E-01 HCOCO2H                                                                 | RO2 1 ARR 1.000E-11 0 0            |
| 20              | HCOCO3H + OH -> HCOCO3                                                                                                     | ARR 1.580E-11 0 0                  |
| 21              | HCOCO3H -> CO + HO2 + OH                                                                                                   | EXTRA 91 7.649E-06 0.682 0.279 1.0 |
| 22              | HCOCO3H -> CO + HO2 + OH                                                                                                   | EXTRA 91 2.792E-05 0.805 0.338 1.0 |
| 23              | HCOCO2H + OH -> CO + HO2                                                                                                   | ARR 1.230E-11 0 0                  |
| 24              | HCOCO2H -> CO + 2.000E+00 HO2                                                                                              | EXTRA 91 1.537E-04 0.170 0.208 1.0 |
| 25              | GLYOO + SO2 -> GLY + SO3                                                                                                   | ARR 7.000E-14 0 0                  |
| 26              | GLYOO + CO -> GLY                                                                                                          | ARR 1.200E-15 0 0                  |
| 27              | GLYOO + NO -> GLY + NO2                                                                                                    | ARR 1.000E-14 0 0                  |
| 28              | GLYOO + NO2 -> GLY + NO3                                                                                                   | ARR 1.000E-15 0 0                  |
| 29              | GLYOO -> GLY + H2O2                                                                                                        | TB H2O ARR 6.000E-18 0 0           |
| 30              | GLYOO -> HCOCO2H                                                                                                           | TB H2O ARR 1.000E-17 0 0           |
| 31              | HCOCH2O2 + NO -> HCOCH2O + NO2                                                                                             | ARR 2.700E-12 0 -360.00            |
| 32              | HCOCH2O2 + NO3 -> HCOCH2O + NO2                                                                                            | ARR 2.300E-12 0 0                  |
| 33              | HCOCH2O2 + HO2 -> HCOCH2OOH                                                                                                | ARR 1.126E-13 0 -1300.00           |
| 34              | HCOCH2O2 -> 6.000E-01 HCOCH2O + 2.000E-01 GLY + 2.000E-01 HOCH2CHO                                                         | RO2 1 ARR 2.000E-12 0 0            |
| 35              | HCOCH2O -> CO + HCHO + HO2                                                                                                 | ARR 1.000E+06 0 0                  |
| 36              | HCOCH2OOH -> HCOCH2O + OH                                                                                                  | EXTRA 91 7.649E-06 0.682 0.279 1.0 |
| 37              | HCOCH2OOH -> CO + HCHO + HO2 + OH                                                                                          | EXTRA 91 2.792E-05 0.805 0.338 1.0 |
| 38              | HCOCH2OOH + OH -> HCOCH2O2                                                                                                 | ARR 1.900E-12 0 -190.00            |
| 39              | HCOCH2OOH + OH -> GLY + OH                                                                                                 | ARR 2.910E-11 0 0                  |
| 40              | BENZENE + OH -> 4.7E-01 BZBIPERO2 + 5.3E-01 PHENOL + 5.3E-01 HO2                                                           | ARR 2.300E-12 0 190.00             |

|    |                                                                                                                                        |                                    |
|----|----------------------------------------------------------------------------------------------------------------------------------------|------------------------------------|
| 41 | BZBIPERO2 + NO -> 9.180E-01 BZBIPERO + 9.180E-01 NO2 + 8.200E-02 BZBIPERNO3                                                            | ARR 2.700E-12 0 -360.00            |
| 42 | BZBIPERO2 + NO3 -> BZBIPERO + NO2                                                                                                      | ARR 2.300E-12 0 0                  |
| 43 | BZBIPERO2 + HO2 -> BZBIPEROOH                                                                                                          | ARR 2.241E-13 0 -1300.00           |
| 44 | BZBIPERO2 -> 6.000E-01 BZBIPERO + 2.000E-01 BZBIPER2OH + 2.000E-01 BZOBIPEROH                                                          | RO2 1 ARR 8.800E-13 0 0            |
| 45 | BZBIPERO -> GLY + HO2 + 6.3E-01 MALDIAL + 3.7E-01 KETENOL                                                                              | ARR 1.000E+06 0 0                  |
| 46 | BZBIPERNO3 -> BZBIPERO + NO2                                                                                                           | EXTRA 91 4.095E-06 1.111 0.316 1.0 |
| 47 | BZBIPERNO3 + OH -> 5.610E-01 GLY + 5.610E-01 MALDIALONO2 + 2.145E-01 C6DIALPEROHONO2 + 2.145E-01 HO2 + 2.245E-01 BEPOX + 2.245E-01 NO2 | ARR 9.77E-11 0 0                   |
| 48 | BZBIPEROOH -> BZBIPERO + OH                                                                                                            | EXTRA 91 7.649E-06 0.682 0.279 1.0 |
| 49 | BZBIPEROOH + OH -> 0.57 BEPOX + 0.43 BZOBIPEROH + OH                                                                                   | ARR 1.870E-10 0 0                  |
| 50 | BEPOX + OH -> BEPOXOH                                                                                                                  | ARR 3.03E-11 0 0                   |
| 51 | BEPOXOH + OH ->                                                                                                                        | ARR 6.03E-11 0 0                   |
| 52 | BEPOXOH + NO3 ->                                                                                                                       | ARR 2.29E-12 0 0                   |
| 53 | BZBIPER2OH + OH -> BZOBIPEROH + HO2                                                                                                    | ARR 1.210E-10 0 0                  |
| 54 | BZOBIPEROH -> GLY + HO2 + MALDIALCO3                                                                                                   | EXTRA 91 5.804E-06 1.092 0.377 1.0 |
| 55 | BZOBIPEROH + OH -> GLY + MALDIALCO3                                                                                                    | ARR 8.160E-11 0 0                  |
| 56 | MALDIAL + OH -> 1.700E-01 MALDIALO2 + 8.300E-01 MALDIALCO3                                                                             | ARR 5.200E-11 0 0                  |
| 57 | MALDIAL -> 8.000E-01 KETENOL + 2.000E-01 ACR                                                                                           | EXTRA 91 1.631E-03 0.244 0.267 1.0 |
| 58 | MALDIAL + O3 -> GLYOOA + GLY                                                                                                           | ARR 2.000E-18 0 0                  |
| 59 | MALDIAL + NO3 -> HNO3 + MALDIALCO3                                                                                                     | ARR 5.600E-12 0 1860.00            |
| 60 | MALDIALO2 + NO -> MALDIALO + NO2                                                                                                       | ARR 2.700E-12 0 -360.00            |
| 61 | MALDIALO2 + NO3 -> MALDIALO + NO2                                                                                                      | ARR 2.300E-12 0 0                  |
| 62 | MALDIALO2 + HO2 -> MALDIALOOH                                                                                                          | ARR 1.819E-13 0 -1300.00           |
| 63 | MALDIALO2 -> 6.000E-01 MALDIALO + 2.000E-01 HOCOC4DIAL + 2.000E-01 HOHOC4DIAL                                                          | RO2 1 ARR 8.800E-13 0 0            |
| 64 | MALDIALO -> 2.000E+00 GLY + HO2                                                                                                        | ARR 1.000E+06 0 0                  |
| 65 | MALDIALCO3 + NO -> MALDIALCO2 + NO2                                                                                                    | ARR 7.500E-12 0 -290.00            |
| 66 | MALDIALCO3 + NO2 -> MALDIALPAN                                                                                                         | EXTRA 93 21 1.0                    |
| 67 | MALDIALCO3 + NO3 -> MALDIALCO2 + NO2                                                                                                   | ARR 4.002E-12 0 0                  |
| 68 | MALDIALCO3 + HO2 -> 4.100E-01 MALDALCO3H + 1.500E-01 MALDALCO2H + 1.500E-01 O3 + 4.400E-01 MALDIALCO2 + 4.400E-01 OH                   | ARR 5.200E-13 0 -980.00            |
| 69 | MALDIALCO3 -> 7.000E-01 MALDIALCO2 + 3.000E-01 MALDALCO2H                                                                              | RO2 1 ARR 1.000E-11 0 0            |
| 70 | MALDIALPAN -> MALDIALCO3 + NO2                                                                                                         | EXTRA 93 22 1.0                    |
| 71 | MALDIALPAN + OH -> 2.000E+00 CO + GLY + NO2                                                                                            | ARR 3.700E-11 0 0                  |
| 72 | MALDIALOOH -> MALDIALO + OH                                                                                                            | EXTRA 91 7.649E-06 0.682 0.279 1.0 |
| 73 | MALDIALOOH -> C32OH13CO + CO + HO2 + OH                                                                                                | EXTRA 91 5.584E-05 0.805 0.338 1.0 |
| 74 | MALDIALOOH + OH -> MALDIALO2                                                                                                           | ARR 1.900E-12 0 -190.00            |
| 75 | MALDIALOOH + OH -> HOCOC4DIAL + OH                                                                                                     | ARR 1.220E-10 0 0                  |
| 76 | HOCOC4DIAL -> CO + HCOCOHCO3 + HO2                                                                                                     | EXTRA 91 1.537E-04 0.170 0.208 1.0 |
| 77 | HOCOC4DIAL -> CO + HCOCOHCO3 + HO2                                                                                                     | EXTRA 91 2.792E-05 0.805 0.338 1.0 |
| 78 | HOCOC4DIAL + OH -> CO2C4DIAL + HO2                                                                                                     | ARR 3.670E-11 0 0                  |
| 79 | CO2C4DIAL -> 4.000E+00 CO + 2.000E+00 HO2                                                                                              | EXTRA 91 3.074E-04 0.170 0.208 1.0 |
| 80 | CO2C4DIAL + OH -> 4.000E+00 CO + HO2                                                                                                   | ARR 2.450E-11 0 0                  |
| 81 | HCOCOHCO3 + NO -> GLY + HO2 + NO2                                                                                                      | ARR 7.500E-12 0 -290.00            |
| 82 | HCOCOHCO3 + NO2 -> HCOCOHCO3PAN                                                                                                        | EXTRA 93 21 1.0                    |
| 83 | HCOCOHCO3 + NO3 -> GLY + HO2 + NO2                                                                                                     | ARR 4.002E-12 0 0                  |

|     |                                                                                                           |                                    |
|-----|-----------------------------------------------------------------------------------------------------------|------------------------------------|
| 84  | HCOCOHCO3 + HO2 -> 5.600E-01 HCOCOHCO3H + 4.400E-01 GLY + 4.400E-01 HO2 + 4.400E-01 OH                    | ARR 5.200E-13 0 -980.00            |
| 85  | HCOCOHCO3 -> GLY + HO2                                                                                    | RO2 1 ARR 1.000E-11 0 0            |
| 86  | HCOCOHPAN -> HCOCOHCO3 + NO2                                                                              | EXTRA 93 22 1.0                    |
| 87  | HCOCOHPAN + OH -> CO + GLY + NO2                                                                          | ARR 6.970E-11 0 0                  |
| 88  | HCOCOHCO3H -> GLY + HO2 + OH                                                                              | EXTRA 91 7.649E-06 0.682 0.279 1.0 |
| 89  | HCOCOHCO3H + OH -> HCOCOHCO3                                                                              | ARR 7.330E-11 0 0                  |
| 90  | HOHOC4DIAL -> C32OH13CO + CO + 2.000E+00 HO2                                                              | EXTRA 91 5.584E-05 0.805 0.338 1.0 |
| 91  | HOHOC4DIAL + OH -> HO2 + HOCOC4DIAL                                                                       | ARR 8.130E-11 0 0                  |
| 92  | C32OH13CO -> CO + GLY + 2.000E+00 HO2                                                                     | EXTRA 91 5.584E-05 0.805 0.338 1.0 |
| 93  | C32OH13CO + OH -> HCOCOHCO3                                                                               | ARR 1.360E-10 0 0                  |
| 94  | BZEPOXMUC + O3 -> EPXC4DIAL + GLYOOA                                                                      | ARR 2.000E-18 0 0                  |
| 95  | BZEPOXMUC -> 1.500E+00 CO + 1.500E+00 HO2 + 5.000E-01 MALDIAL + 5.000E-01 C5DIALO2                        | EXTRA 91 1.165E-03 0.244 0.267 1.0 |
| 96  | BZEPOXMUC + NO3 -> BZEMUCCO3 + HNO3                                                                       | ARR 7.700E-12 0 1860.00            |
| 97  | BZEPOXMUC + OH -> 6.900E-01 BZEMUCO2 + 3.100E-01 BZEMUCCO3                                                | ARR 6.080E-11 0 0                  |
| 98  | MALANHY + OH -> MALANHYO2                                                                                 | ARR 1.400E-12 0 0                  |
| 99  | MALANHYO2 + NO -> MALANHYO + NO2                                                                          | ARR 2.700E-12 0 -360.00            |
| 100 | MALANHYO2 + NO3 -> MALANHYO + NO2                                                                         | ARR 2.300E-12 0 0                  |
| 101 | MALANHYO2 + HO2 -> MALANHYOOH                                                                             | ARR 1.819E-13 0 -1300.00           |
| 102 | MALANHYO2 -> 6.000E-01 MALANHYO + 2.000E-01 MALANHY2OH + 2.000E-01 MALNHYOHCO                             | RO2 1 ARR 8.800E-13 0 0            |
| 103 | MALANHYO -> HCOCOHCO3                                                                                     | ARR 1.000E+06 0 0                  |
| 104 | MALANHYOOH -> MALANHYO + OH                                                                               | EXTRA 91 7.649E-06 0.682 0.279 1.0 |
| 105 | MALANHYOOH + OH -> MALNHYOHCO + OH                                                                        | ARR 4.660E-11 0 0                  |
| 106 | MALANHY2OH + OH -> HO2 + MALNHYOHCO                                                                       | ARR 2.550E-11 0 0                  |
| 107 | MALNHYOHCO + OH -> 3.000E+00 CO + HO2                                                                     | ARR 5.680E-12 0 0                  |
| 108 | BZEMUCO2 + NO -> 8.950E-01 BZEMUCO + 8.950E-01 NO2 + 1.050E-01 BZEMUCNO3                                  | ARR 2.700E-12 0 -360.00            |
| 109 | BZEMUCO2 + NO3 -> BZEMUCO + NO2                                                                           | ARR 2.300E-12 0 0                  |
| 110 | BZEMUCO2 + HO2 -> BZEMUCOOH                                                                               | ARR 2.241E-13 0 -1300.00           |
| 111 | BZEMUCO2 -> 6.000E-01 BZEMUCO + 2.000E-01 BZEMUCOH + 2.000E-01 BZEMUCCO                                   | RO2 1 ARR 8.800E-13 0 0            |
| 112 | BZEMUCO -> 5.000E-01 C32OH13CO + 5.000E-01 C3DIALO2 + 5.000E-01 EPXC4DIAL + 5.000E-01 GLY + 5.000E-01 HO2 | ARR 1.000E+06 0 0                  |
| 113 | BZEMUCNO3 + OH -> BZEMUCCO + NO2                                                                          | ARR 4.380E-11 0 0                  |
| 114 | BZEMUCNO3 -> EPXC4DIAL + GLY + HO2 + NO2                                                                  | EXTRA 91 7.914E-05 0.764 0.364 1.0 |
| 115 | BZEMUCOOH -> BZEMUCO + OH                                                                                 | EXTRA 91 7.649E-06 0.682 0.279 1.0 |
| 116 | BZEMUCOOH -> BZEMUCO + OH                                                                                 | EXTRA 91 2.792E-05 0.805 0.338 1.0 |
| 117 | BZEMUCOOH + OH -> BZEMUCCO + OH                                                                           | ARR 1.310E-10 0 0                  |
| 118 | BZEMUCOH -> BZEMUCO + HO2                                                                                 | EXTRA 91 5.584E-05 0.805 0.338 1.0 |
| 119 | BZEMUCOH + OH -> BZEMUCCO + HO2                                                                           | ARR 8.230E-11 0 0                  |
| 120 | BZEMUCCO -> C3DIALO2 + HCOCOHCO3                                                                          | EXTRA 91 2.792E-05 0.805 0.338 1.0 |
| 121 | BZEMUCCO -> C3DIALO2 + HCOCOHCO3                                                                          | EXTRA 91 5.804E-06 1.092 0.377 1.0 |
| 122 | BZEMUCCO + OH -> EPXDLCO3 + GLY                                                                           | ARR 9.200E-11 0 0                  |
| 123 | C3DIALO2 + NO -> C3DIALO + NO2                                                                            | ARR 2.700E-12 0 -360.00            |
| 124 | C3DIALO2 + NO3 -> C3DIALO + NO2                                                                           | ARR 2.300E-12 0 0                  |
| 125 | C3DIALO2 + HO2 -> C3DIALOOH                                                                               | ARR 1.513E-13 0 -1300.00           |
| 126 | C3DIALO2 -> 6.000E-01 C3DIALO + 2.000E-01 C32OH13CO + 2.000E-01 C33CO                                     | RO2 1 ARR 8.800E-13 0 0            |
| 127 | C3DIALO -> CO + GLY + HO2                                                                                 | ARR 1.000E+06 0 0                  |

|     |                                                                                                                   |                                    |
|-----|-------------------------------------------------------------------------------------------------------------------|------------------------------------|
| 128 | C3DIALOOH -> C3DIALO + OH                                                                                         | EXTRA 91 7.649E-06 0.682 0.279 1.0 |
| 129 | C3DIALOOH -> CO + GLY + HO2 + OH                                                                                  | EXTRA 91 5.584E-05 0.805 0.338 1.0 |
| 130 | C3DIALOOH + OH -> C33CO + OH                                                                                      | ARR 1.440E-10 0 0                  |
| 131 | C33CO -> 3.000E+00 CO + 2.000E+00 HO2                                                                             | EXTRA 91 5.584E-05 0.805 0.338 1.0 |
| 132 | C33CO + OH -> 3.000E+00 CO + HO2                                                                                  | ARR 5.770E-11 0 0                  |
| 133 | BZEMUCCO3 + NO -> C5DIALO2 + NO2                                                                                  | ARR 7.500E-12 0 -290.00            |
| 134 | BZEMUCCO3 + NO2 -> BZEMUCPAN                                                                                      | EXTRA 93 21 1.0                    |
| 135 | BZEMUCCO3 + NO3 -> C5DIALO2 + NO2                                                                                 | ARR 4.002E-12 0 0                  |
| 136 | BZEMUCCO3 + HO2 -> 4.100E-01 BZEMUCCO3H + 1.500E-01 BZEMUCCO2H + 1.500E-01 O3 + 4.400E-01 C5DIALO2 + 4.400E-01 OH | ARR 5.200E-13 0 -980.00            |
| 137 | BZEMUCCO3 -> 7.000E-01 C5DIALO2 + 3.000E-01 BZEMUCCO2H                                                            | RO2 1 ARR 1.000E-11 0 0            |
| 138 | C5DIALO2 + NO -> C5DIALO + NO2                                                                                    | ARR 2.700E-12 0 -360.00            |
| 139 | C5DIALO2 + NO3 -> C5DIALO + NO2                                                                                   | ARR 2.300E-12 0 0                  |
| 140 | C5DIALO2 + HO2 -> C5DIALOOH                                                                                       | ARR 2.054E-13 0 -1300.00           |
| 141 | C5DIALO2 -> 6.000E-01 C5DIALO + 2.000E-01 C5DIALOH + 2.000E-01 C5DIALCO                                           | RO2 1 ARR 8.800E-13 0 0            |
| 142 | C5DIALO -> CO + HO2 + MALDIAL                                                                                     | ARR 1.000E+06 0 0                  |
| 143 | BZEMUCPAN -> BZEMUCCO3 + NO2                                                                                      | EXTRA 93 22 1.0                    |
| 144 | BZEMUCPAN + OH -> CO + MALDIAL + NO2                                                                              | ARR 4.050E-11 0 0                  |
| 145 | BZEMUCCO3H -> C5DIALO2 + OH                                                                                       | EXTRA 91 7.649E-06 0.682 0.279 1.0 |
| 146 | BZEMUCCO3H -> C5DIALO2 + OH                                                                                       | EXTRA 91 1.140E-05 0.396 0.298 1.0 |
| 147 | BZEMUCCO3H -> C5DIALO2 + OH                                                                                       | EXTRA 91 1.140E-05 0.396 0.298 1.0 |
| 148 | BZEMUCCO3H + OH -> BZEMUCCO3                                                                                      | ARR 4.370E-11 0 0                  |
| 149 | BZEMUCCO2H -> C5DIALO2 + HO2                                                                                      | EXTRA 91 1.140E-05 0.396 0.298 1.0 |
| 150 | BZEMUCCO2H -> C5DIALO2 + HO2                                                                                      | EXTRA 91 1.140E-05 0.396 0.298 1.0 |
| 151 | BZEMUCCO2H + OH -> C5DIALO2                                                                                       | ARR 4.060E-11 0 0                  |
| 152 | C5DIALOOH -> C5DIALO + OH                                                                                         | EXTRA 91 7.649E-06 0.682 0.279 1.0 |
| 153 | C5DIALOOH -> CO + HO2 + MALDIAL + OH                                                                              | EXTRA 91 1.140E-05 0.396 0.298 1.0 |
| 154 | C5DIALOOH -> CO + HO2 + MALDIAL + OH                                                                              | EXTRA 91 1.140E-05 0.396 0.298 1.0 |
| 155 | C5DIALOOH + OH -> C5DIALCO + OH                                                                                   | ARR 7.520E-11 0 0                  |
| 156 | C5DIALOH -> CO + 2.000E+00 HO2 + MALDIAL                                                                          | EXTRA 91 1.140E-05 0.396 0.298 1.0 |
| 157 | C5DIALOH -> CO + 2.000E+00 HO2 + MALDIAL                                                                          | EXTRA 91 1.140E-05 0.396 0.298 1.0 |
| 158 | C5DIALOH + OH -> C5DIALCO + HO2                                                                                   | ARR 7.750E-11 0 0                  |
| 159 | C5DIALCO -> CO + HO2 + MALDIALCO3                                                                                 | EXTRA 91 1.537E-04 0.170 0.208 1.0 |
| 160 | C5DIALCO -> CO + HO2 + MALDIALCO3                                                                                 | EXTRA 91 1.140E-05 0.396 0.298 1.0 |
| 161 | C5DIALCO -> CO + HO2 + MALDIALCO3                                                                                 | EXTRA 91 1.140E-05 0.396 0.298 1.0 |
| 162 | C5DIALCO + OH -> CO + MALDIALCO3                                                                                  | ARR 4.900E-11 0 0                  |
| 163 | EPXC4DIAL -> C3DIALO2 + CO + HO2                                                                                  | EXTRA 91 1.583E-04 0.764 0.364 1.0 |
| 164 | EPXC4DIAL + OH -> EPXDLCO3                                                                                        | ARR 4.320E-11 0 0                  |
| 165 | EPXC4DIAL + NO3 -> EPXDLCO3 + HNO3                                                                                | ARR 1.120E-11 0 1860.00            |
| 166 | EPXDLCO3 + NO -> C3DIALO2 + NO2                                                                                   | ARR 7.500E-12 0 -290.00            |
| 167 | EPXDLCO3 + NO2 -> EPXDLPAN                                                                                        | EXTRA 93 21 1.0                    |
| 168 | EPXDLCO3 + NO3 -> C3DIALO2 + NO2                                                                                  | ARR 4.002E-12 0 0                  |
| 169 | EPXDLCO3 + HO2 -> 4.100E-01 EPXDLCO3H + 1.500E-01 EPXDLCO2H + 1.500E-01 O3 + 4.400E-01 C3DIALO2 + 4.400E-01 OH    | ARR 5.200E-13 0 -980.00            |
| 170 | EPXDLCO3 -> 7.000E-01 C3DIALO2 + 3.000E-01 EPXDLCO2H                                                              | RO2 1 ARR 1.000E-11 0 0            |
| 171 | EPXDLPAN -> EPXDLCO3 + NO2                                                                                        | EXTRA 93 22 1.0                    |

|     |                                                                                                                                      |                                    |
|-----|--------------------------------------------------------------------------------------------------------------------------------------|------------------------------------|
| 172 | EPXDLPAN + OH -> C33CO + CO + NO2                                                                                                    | ARR 2.290E-11 0 0                  |
| 173 | EPXDLCO3H -> C3DIALO2 + OH                                                                                                           | EXTRA 91 7.649E-06 0.682 0.279 1.0 |
| 174 | EPXDLCO3H -> C3DIALO2 + OH                                                                                                           | EXTRA 91 7.914E-05 0.764 0.364 1.0 |
| 175 | EPXDLCO3H + OH -> EPXDLCO3                                                                                                           | ARR 2.620E-11 0 0                  |
| 176 | EPXDLCO2H -> C3DIALO2 + HO2                                                                                                          | EXTRA 91 7.914E-05 0.764 0.364 1.0 |
| 177 | EPXDLCO2H + OH -> C3DIALO2                                                                                                           | ARR 2.310E-11 0 0                  |
| 178 | PBZQONE + OH -> PBZQO2                                                                                                               | ARR 4.600E-12 0 0                  |
| 179 | PBZQONE + NO3 -> NBZQO2                                                                                                              | ARR 3.000E-13 0 0                  |
| 180 | PBZQO2 + NO -> NO2 + PBZQO                                                                                                           | ARR 2.700E-12 0 -360.00            |
| 181 | PBZQO2 + NO3 -> NO2 + PBZQO                                                                                                          | ARR 2.300E-12 0 0                  |
| 182 | PBZQO2 + HO2 -> PBZQOOH                                                                                                              | ARR 2.241E-13 0 -1300.00           |
| 183 | PBZQO2 -> 6.000E-01 PBZQO + 2.000E-01 PBZQOH + 2.000E-01 PBZQCO                                                                      | RO2 1 ARR 8.800E-13 0 0            |
| 184 | PBZQO -> C5CO2OHC03                                                                                                                  | ARR 1.000E+06 0 0                  |
| 185 | PBZQOOH -> OH + PBZQO                                                                                                                | EXTRA 91 7.649E-06 0.682 0.279 1.0 |
| 186 | PBZQOOH + OH -> OH + PBZQCO                                                                                                          | ARR 1.230E-10 0 0                  |
| 187 | PBZQOH + OH -> HO2 + PBZQCO                                                                                                          | ARR 9.180E-11 0 0                  |
| 188 | PBZQCO + OH -> C5CO2OHC03                                                                                                            | ARR 6.070E-11 0 0                  |
| 189 | BZFUONE + OH -> BZFUO2                                                                                                               | ARR 4.450E-11 0 0                  |
| 190 | BZFUONE + NO3 -> NBZFUO2                                                                                                             | ARR 3.000E-13 0 0                  |
| 191 | BZFUONE + O3 -> BZFUONOOA                                                                                                            | ARR 2.200E-19 0 0                  |
| 192 | BZFUO2 + NO -> BZFUO + NO2                                                                                                           | ARR 2.700E-12 0 -360.00            |
| 193 | BZFUO2 + NO3 -> BZFUO + NO2                                                                                                          | ARR 2.300E-12 0 0                  |
| 194 | BZFUO2 + HO2 -> BZFUOOH                                                                                                              | ARR 2.054E-13 0 -1300.00           |
| 195 | BZFUO2 -> 6.000E-01 BZFUO + 2.000E-01 BZFUOH + 2.000E-01 BZFUCO                                                                      | RO2 1 ARR 8.800E-13 0 0            |
| 196 | BZFUO -> CO14O3CHO + HO2                                                                                                             | ARR 1.000E+06 0 0                  |
| 197 | BZFUOOH -> BZFUO + OH                                                                                                                | EXTRA 91 7.649E-06 0.682 0.279 1.0 |
| 198 | BZFUOOH + OH -> BZFUO2                                                                                                               | ARR 3.680E-11 0 0                  |
| 199 | BZFUOH + OH -> BZFUCO + HO2                                                                                                          | ARR 2.780E-11 0 0                  |
| 200 | BZFUCO + OH -> CO14O3CHO + HO2                                                                                                       | ARR 1.780E-11 0 0                  |
| 201 | CO14O3CHO -> CO + HCOCH2O2 + HO2                                                                                                     | EXTRA 91 1.537E-04 0.170 0.208 1.0 |
| 202 | CO14O3CHO + OH -> CO + HCOCH2O2                                                                                                      | ARR 3.440E-11 0 0                  |
| 203 | CO14O3CHO + NO3 -> CO + HCOCH2O2 + HNO3                                                                                              | ARR 1.120E-11 0 1860.00            |
| 204 | PHENOL + OH -> 6.000E-02 C6H5O + 1.26E-01 PHENO2 + 8.000E-01 CATECHOL + 8.1274E-01 HO2 + 1.26E-03 gdBPR_PHEN + 1.274E-02 OXOSORBACID | ARR 4.700E-13 0 -1220.00           |
| 205 | PHENOL + NO3 -> 7.420E-01 C6H5O + 7.420E-01 HNO3 + 2.580E-01 NPHEO2                                                                  | ARR 3.800E-12 0 0                  |
| 206 | PHENO -> HO2 + 2.900E-01 PBZQONE + 7.100E-01 GLY + 7.100E-01 MALDALCO2H                                                              | ARR 1.000E+06 0 0                  |
| 207 | C6H5O + O3 -> C6H5O2                                                                                                                 | ARR 2.860E-13 0 0                  |
| 208 | C6H5O + NO2 -> HOC6H4NO2                                                                                                             | ARR 2.080E-12 0 0                  |
| 209 | C6H5OOH -> C6H5O + OH                                                                                                                | EXTRA 91 7.649E-06 0.682 0.279 1.0 |
| 210 | C6H5OOH + OH -> C6H5O2                                                                                                               | ARR 3.600E-12 0 0                  |
| 211 | HOC6H4NO2 + NO3 -> HNO3 + NPHEN1O                                                                                                    | ARR 9.000E-14 0 0                  |
| 212 | HOC6H4NO2 + OH -> NPHEN1O                                                                                                            | ARR 9.000E-13 0 0                  |
| 213 | NPHEN1O + NO2 -> DNPHEN                                                                                                              | ARR 2.080E-12 0 0                  |
| 214 | NPHEN1O + O3 -> NPHEN1O2                                                                                                             | ARR 2.860E-13 0 0                  |
| 215 | NPHEN1O2 + NO -> NO2 + NPHEN1O                                                                                                       | ARR 2.700E-12 0 -360.00            |
| 216 | NPHEN1O2 + NO3 -> NO2 + NPHEN1O                                                                                                      | ARR 2.300E-12 0 0                  |

|     |                                                                                                                                                                                                |                                                                                                                                       |
|-----|------------------------------------------------------------------------------------------------------------------------------------------------------------------------------------------------|---------------------------------------------------------------------------------------------------------------------------------------|
| 217 | NPHEN1O2 + HO2 -> NPHEN1OOH                                                                                                                                                                    | ARR 2.241E-13 0 -1300.00                                                                                                              |
| 218 | NPHEN1O2 -> NPHEN1O                                                                                                                                                                            | RO2 1 ARR 2.500E-13 0 0                                                                                                               |
| 219 | NPHEN1OOH -> NPHEN1O + OH                                                                                                                                                                      | EXTRA 91 7.649E-06 0.682 0.279 1.0                                                                                                    |
| 220 | NPHEN1OOH + OH -> NPHEN1O2                                                                                                                                                                     | ARR 9.000E-13 0 0                                                                                                                     |
| 221 | CATECHOL + OH -> 7.000E-02 CATEC1O + 2.2995E-01 BENZ3OH + 2.205E-02 PBZQ1OH + 4.095E-02 CATECBIPERO2 + 3.18525E-01 C6H6O3 + 1.8792975E-01 gdBPR_CAT + 1.3059525E-01 C6H6O4 + 6.7907025E-01 HO2 | ARR 1.000E-10 0 0                                                                                                                     |
| 222 | CATECHOL + NO3 -> CATEC1O + HNO3                                                                                                                                                               | ARR 9.900E-11 0 0                                                                                                                     |
| 223 | CATECHOL + O3 -> CATECOOA                                                                                                                                                                      | ARR 9.200E-18 0 0                                                                                                                     |
| 224 | CATECOOA -> HCOCO2H + HO2 + MALDALCO2H + OH                                                                                                                                                    | ARR 1.000E+06 0 0                                                                                                                     |
| 225 | CATEC1O + NO2 -> NCATECHOL                                                                                                                                                                     | ARR 2.080E-12 0 0                                                                                                                     |
| 226 | CATEC1O + O3 -> CATEC1O2                                                                                                                                                                       | ARR 2.860E-13 0 0                                                                                                                     |
| 227 | CATEC1O2 + NO -> CATEC1O + NO2                                                                                                                                                                 | ARR 2.700E-12 0 -360.00                                                                                                               |
| 228 | CATEC1O2 + NO3 -> CATEC1O + NO2                                                                                                                                                                | ARR 2.300E-12 0 0                                                                                                                     |
| 229 | CATEC1O2 + HO2 -> CATEC1OOH                                                                                                                                                                    | ARR 2.241E-13 0 -1300.00                                                                                                              |
| 230 | CATEC1O2 -> CATEC1O                                                                                                                                                                            | RO2 1 ARR 8.800E-13 0 0                                                                                                               |
| 231 | CATEC1OOH -> CATEC1O + OH                                                                                                                                                                      | EXTRA 91 7.649E-06 0.682 0.279 1.0                                                                                                    |
| 232 | CATEC1OOH + OH -> CATEC1O2                                                                                                                                                                     | ARR 1.900E-12 0 -190.00                                                                                                               |
| 233 | NCATECHOL + OH -> NCATECO2                                                                                                                                                                     | ARR 3.470E-12 0 0                                                                                                                     |
| 234 | NCATECHOL ->                                                                                                                                                                                   | PHOTOLYSIS 1.42398E-04 1.40694E-04 1.35552E-04 1.26744E-04 1.1391E-04 9.651E-05 7.3944E-05 4.6367E-05 2.3588E-05 7.258E-06 0.0000E+00 |
| 235 | NCATECHOL + NO3 -> NNCATECO2                                                                                                                                                                   | ARR 2.600E-12 0 0                                                                                                                     |
| 236 | NCATECO2 + NO -> NCATECO + NO2                                                                                                                                                                 | ARR 2.700E-12 0 -360.00                                                                                                               |
| 237 | NCATECO2 + NO3 -> NCATECO + NO2                                                                                                                                                                | ARR 2.300E-12 0 0                                                                                                                     |
| 238 | NCATECO2 + HO2 -> NCATECOOH                                                                                                                                                                    | ARR 2.241E-13 0 -1300.00                                                                                                              |
| 239 | NCATECO2 -> NCATECO                                                                                                                                                                            | RO2 1 ARR 8.000E-13 0 0                                                                                                               |
| 240 | NCATECO -> HCOCO2H + HO2 + NC4DCO2H                                                                                                                                                            | ARR 1.000E+06 0 0                                                                                                                     |
| 241 | NCATECOOH -> NCATECO + OH                                                                                                                                                                      | EXTRA 91 7.649E-06 0.682 0.279 1.0                                                                                                    |
| 242 | NCATECOOH + OH -> NCATECO2                                                                                                                                                                     | ARR 1.900E-12 0 -190.00                                                                                                               |
| 243 | NNCATECO2 + NO -> NNCATECO + NO2                                                                                                                                                               | ARR 2.700E-12 0 -360.00                                                                                                               |
| 244 | NNCATECO2 + NO3 -> NNCATECO + NO2                                                                                                                                                              | ARR 2.300E-12 0 0                                                                                                                     |
| 245 | NNCATECO2 + HO2 -> NNCATECOOH                                                                                                                                                                  | ARR 2.241E-13 0 -1300.00                                                                                                              |
| 246 | NNCATECO2 -> NNCATECO                                                                                                                                                                          | RO2 1 ARR 8.000E-13 0 0                                                                                                               |
| 247 | NNCATECO -> HCOCO2H + NC4DCO2H + NO2                                                                                                                                                           | ARR 1.000E+06 0 0                                                                                                                     |
| 248 | NNCATECOOH -> NNCATECO + OH                                                                                                                                                                    | EXTRA 91 7.649E-06 0.682 0.279 1.0                                                                                                    |
| 249 | NNCATECOOH + OH -> NNCATECO2                                                                                                                                                                   | ARR 1.900E-12 0 -190.00                                                                                                               |
| 250 | NC4DCO2H + OH -> NC4DCO2                                                                                                                                                                       | ARR 1.900E-12 0 -190.00                                                                                                               |
| 251 | NC4DCO2 -> MALANHY + NO2                                                                                                                                                                       | ARR 1.000E+06 0 0                                                                                                                     |
| 252 | DNPHEN + OH -> DNPHENO2                                                                                                                                                                        | ARR 3.000E-14 0 0                                                                                                                     |
| 253 | DNPHEN + NO3 -> NDNPHENO2                                                                                                                                                                      | ARR 2.250E-15 0 0                                                                                                                     |
| 254 | DNPHENO2 + NO -> DNPHEO + NO2                                                                                                                                                                  | ARR 2.700E-12 0 -360.00                                                                                                               |
| 255 | DNPHENO2 + NO3 -> DNPHEO + NO2                                                                                                                                                                 | ARR 2.300E-12 0 0                                                                                                                     |
| 256 | DNPHENO2 + HO2 -> DNPHEOOH                                                                                                                                                                     | ARR 2.241E-13 0 -1300.00                                                                                                              |
| 257 | DNPHENO2 -> DNPHEO                                                                                                                                                                             | RO2 1 ARR 8.000E-13 0 0                                                                                                               |
| 258 | DNPHEO -> HCOCO2H + NC4DCO2H + NO2                                                                                                                                                             | ARR 1.000E+06 0 0                                                                                                                     |
| 259 | DNPHEOOH -> DNPHEO + OH                                                                                                                                                                        | EXTRA 91 7.649E-06 0.682 0.279 1.0                                                                                                    |

|     |                                                                                                               |                                    |
|-----|---------------------------------------------------------------------------------------------------------------|------------------------------------|
| 260 | DNPHEOOH + OH -> DNPHEO2                                                                                      | ARR 1.900E-12 0 -190.00            |
| 261 | NDNPHEO2 + NO -> NDNPHEO + NO2                                                                                | ARR 2.700E-12 0 -360.00            |
| 262 | NDNPHEO2 + NO3 -> NDNPHEO + NO2                                                                               | ARR 2.300E-12 0 0                  |
| 263 | NDNPHEO2 + HO2 -> NDNPHEOOH                                                                                   | ARR 2.241E-13 0 -1300.00           |
| 264 | NDNPHEO2 -> NDNPHEO                                                                                           | RO2 1 ARR 8.000E-13 0 0            |
| 265 | NDNPHEO -> 2.000E+00 CO + HNO3 + NC4DCO2H + NO2                                                               | ARR 1.000E+06 0 0                  |
| 266 | NDNPHEOOH -> NDNPHEO + OH                                                                                     | EXTRA 91 7.649E-06 0.682 0.279 1.0 |
| 267 | NDNPHEOOH + OH -> NDNPHEO2                                                                                    | ARR 1.900E-12 0 -190.00            |
| 268 | PHENO2 + NO -> NO2 + PHENO                                                                                    | ARR 2.700E-12 0 -360.00            |
| 269 | PHENO2 + NO3 -> NO2 + PHENO                                                                                   | ARR 2.300E-12 0 0                  |
| 270 | PHENO2 + HO2 -> PHENOOH                                                                                       | ARR 2.241E-13 0 -1300.00           |
| 271 | PHENO2 -> 7.000E-01 PHENO + 3.000E-01 PHENOH                                                                  | RO2 1 ARR 8.000E-13 0 0            |
| 272 | PHENOOH -> OH + PHENO                                                                                         | EXTRA 91 7.649E-06 0.682 0.279 1.0 |
| 273 | PHENOOH + OH -> PHENO2                                                                                        | ARR 1.160E-10 0 0                  |
| 274 | PHENOH + OH -> PHENO                                                                                          | ARR 1.130E-10 0 0                  |
| 275 | NPHENO2 + NO -> NO2 + NPHENO                                                                                  | ARR 2.700E-12 0 -360.00            |
| 276 | NPHENO2 + NO3 -> NO2 + NPHENO                                                                                 | ARR 2.300E-12 0 0                  |
| 277 | NPHENO2 + HO2 -> NPHENOOH                                                                                     | ARR 2.241E-13 0 -1300.00           |
| 278 | NPHENO2 -> 7.000E-01 NPHENO + 3.000E-01 NPHENOH                                                               | RO2 1 ARR 8.000E-13 0 0            |
| 279 | NPHENO -> GLY + MALDALCO2H + NO2                                                                              | ARR 1.000E+06 0 0                  |
| 280 | NPHENOOH -> NPHENO + OH                                                                                       | EXTRA 91 7.649E-06 0.682 0.279 1.0 |
| 281 | NPHENOOH + OH -> NPHENO2                                                                                      | ARR 1.070E-10 0 0                  |
| 282 | NPHENOOH -> GLY + MALDALCO2H + NO2 + OH                                                                       | EXTRA 91 4.095E-06 1.111 0.316 1.0 |
| 283 | NPHENOH + OH -> NPHENO                                                                                        | ARR 1.040E-10 0 0                  |
| 284 | NPHENOH -> GLY + HO2 + MALDALCO2H + NO2                                                                       | EXTRA 91 4.095E-06 1.111 0.316 1.0 |
| 285 | MALDALCO2H -> 2.000E+00 CO + HCOCO2H + 2.000E+00 HO2                                                          | EXTRA 91 1.140E-05 0.396 0.298 1.0 |
| 286 | MALDALCO2H -> 2.000E+00 CO + HCOCO2H + 2.000E+00 HO2                                                          | EXTRA 91 1.140E-05 0.396 0.298 1.0 |
| 287 | MALDALCO2H + OH -> MALDIALCO2                                                                                 | ARR 3.700E-11 0 0                  |
| 288 | MALDALCO3H -> MALDIALCO2 + OH                                                                                 | EXTRA 91 1.520E-03 0.396 0.298 1.0 |
| 289 | MALDALCO3H + OH -> MALDIALCO3                                                                                 | ARR 4.000E-11 0 0                  |
| 290 | C5CO2OHC03 + NO -> CO + HO2 + HOCOC4DIAL + NO2                                                                | ARR 7.500E-12 0 -290.00            |
| 291 | C5CO2OHC03 + NO2 -> C5CO2OHPAN                                                                                | EXTRA 93 21 1.0                    |
| 292 | C5CO2OHC03 + NO3 -> CO + HO2 + HOCOC4DIAL + NO2                                                               | ARR 4.002E-12 0 0                  |
| 293 | C5CO2OHC03 + HO2 -> 5.600E-01 C5COOHCO3H + 4.400E-01 CO + 4.400E-01 HO2 + 4.400E-01 HOCOC4DIAL + 4.400E-01 OH | ARR 5.200E-13 0 -980.00            |
| 294 | C5CO2OHC03 -> CO + HO2 + HOCOC4DIAL                                                                           | RO2 1 ARR 1.000E-11 0 0            |
| 295 | C5CO2OHPAN -> C5CO2OHC03 + NO2                                                                                | EXTRA 93 22 1.0                    |
| 296 | C5CO2OHPAN + OH -> 2.000E+00 CO + HOCOC4DIAL + NO2                                                            | ARR 7.660E-11 0 0                  |
| 297 | C5COOHCO3H + OH -> C5CO2OHC03                                                                                 | ARR 8.010E-11 0 0                  |
| 298 | C5COOHCO3H -> CO + HO2 + HOCOC4DIAL + OH                                                                      | EXTRA 91 7.649E-06 0.682 0.279 1.0 |
| 299 | MALDIALCO2 -> 4.000E-01 CO + 4.000E-01 GLY + HO2 + 6.000E-01 MALANHY                                          | ARR 1.000E+06 0 0                  |
| 300 | NBZFUO2 + NO -> NBZFUO + NO2                                                                                  | ARR 2.700E-12 0 -360.00            |
| 301 | NBZFUO2 + NO3 -> NBZFUO + NO2                                                                                 | ARR 2.300E-12 0 0                  |
| 302 | NBZFUO2 + HO2 -> NBZFUOOH                                                                                     | ARR 1.819E-13 0 -1300.00           |
| 303 | NBZFUO2 -> NBZFUO                                                                                             | RO2 1 ARR 8.800E-13 0 0            |
| 304 | NBZFUO -> 5.000E-01 CO14O3CHO + 5.000E-01 NO2 + 5.000E-01 HO2 + 5.000E-01 NBZFUONE                            | ARR 1.000E+06 0 0                  |
| 305 | NBZFUONE + OH -> BZFUCO + NO2                                                                                 | ARR 1.160E-12 0 0                  |

|     |                                                                                                                                                    |                                    |
|-----|----------------------------------------------------------------------------------------------------------------------------------------------------|------------------------------------|
| 306 | NBZFUOOH -> NBZFUO + OH                                                                                                                            | EXTRA 91 7.649E-06 0.682 0.279 1.0 |
| 307 | NBZFUOOH + OH -> NBZFUO2                                                                                                                           | ARR 6.180E-12 0 0                  |
| 308 | BZFUONOOA -> 5.000E-01 BZFUONOO + 5.000E-01 CO + 5.000E-01 HCOCH2O2 + 5.000E-01 OH                                                                 | ARR 1.000E+06 0 0                  |
| 309 | BZFUONOO + SO2 -> CO14O3CHO + SO3                                                                                                                  | ARR 7.000E-14 0 0                  |
| 310 | BZFUONOO + CO -> CO14O3CHO                                                                                                                         | ARR 1.200E-15 0 0                  |
| 311 | BZFUONOO + NO -> CO14O3CHO + NO2                                                                                                                   | ARR 1.000E-14 0 0                  |
| 312 | BZFUONOO + NO2 -> CO14O3CHO + NO3                                                                                                                  | ARR 1.000E-15 0 0                  |
| 313 | BZFUONOO -> CO14O3CHO + H2O2                                                                                                                       | TB H2O ARR 6.000E-18 0 0           |
| 314 | BZFUONOO -> CO14O3CO2H                                                                                                                             | TB H2O ARR 1.000E-17 0 0           |
| 315 | CO14O3CO2H + OH -> HCOCH2O2                                                                                                                        | ARR 2.190E-11 0 0                  |
| 316 | NBZQO2 + NO -> NBZQO + NO2                                                                                                                         | ARR 2.700E-12 0 -360.00            |
| 317 | NBZQO2 + NO3 -> NBZQO + NO2                                                                                                                        | ARR 2.300E-12 0 0                  |
| 318 | NBZQO2 + HO2 -> NBZQOOH                                                                                                                            | ARR 2.241E-13 0 -1300.00           |
| 319 | NBZQO2 -> NBZQO                                                                                                                                    | RO2 1 ARR 8.800E-13 0 0            |
| 320 | NBZQO -> C6CO4DB + NO2                                                                                                                             | ARR 1.000E+06 0 0                  |
| 321 | NBZQOOH -> NBZQO + OH                                                                                                                              | EXTRA 91 7.649E-06 0.682 0.279 1.0 |
| 322 | NBZQOOH + OH -> NBZQO2                                                                                                                             | ARR 6.680E-11 0 0                  |
| 323 | C6CO4DB -> C4CO2DBC03 + CO + HO2                                                                                                                   | EXTRA 91 3.074E-04 0.170 0.208 1.0 |
| 324 | C6CO4DB + OH -> C33CO + 3.000E+00 CO + HO2                                                                                                         | ARR 7.700E-11 0 0                  |
| 325 | C4CO2DBC03 + NO -> C33CO + CO + HO2 + NO2                                                                                                          | ARR 7.500E-12 0 -290.00            |
| 326 | C4CO2DBC03 + NO2 -> C4CO2DBPAN                                                                                                                     | EXTRA 93 21 1.0                    |
| 327 | C4CO2DBC03 + NO3 -> C33CO + CO + HO2 + NO2                                                                                                         | ARR 4.002E-12 0 0                  |
| 328 | C4CO2DBC03 + HO2 -> 5.600E-01 C4CO2DCO3H + 4.400E-01 C33CO + 4.400E-01 CO + 4.400E-01 HO2 + 4.400E-01 OH                                           | ARR 5.200E-13 0 -980.00            |
| 329 | C4CO2DBC03 -> C33CO + CO + HO2                                                                                                                     | RO2 1 ARR 1.000E-11 0 0            |
| 330 | C4CO2DBPAN -> C4CO2DBC03 + NO2                                                                                                                     | EXTRA 93 22 1.0                    |
| 331 | C4CO2DBPAN + OH -> C33CO + CO + NO2                                                                                                                | ARR 2.740E-11 0 0                  |
| 332 | C4CO2DCO3H -> C33CO + CO + HO2 + OH                                                                                                                | EXTRA 91 7.649E-06 0.682 0.279 1.0 |
| 333 | C4CO2DCO3H -> C33CO + CO + HO2 + OH                                                                                                                | EXTRA 91 1.537E-04 0.170 0.208 1.0 |
| 334 | C4CO2DCO3H + OH -> C4CO2DBC03                                                                                                                      | ARR 3.060E-11 0 0                  |
| 335 | C6H5O2 + NO -> C6H5O + NO2                                                                                                                         | ARR 2.700E-12 0 -360.00            |
| 336 | C6H5O2 + NO3 -> C6H5O + NO2                                                                                                                        | ARR 2.300E-12 0 0                  |
| 337 | C6H5O2 + HO2 -> C6H5OOH                                                                                                                            | ARR 2.241E-13 0 -1300.00           |
| 338 | C6H5O2 -> C6H5O                                                                                                                                    | RO2 1 ARR 2.500E-13 0 0            |
| 339 | NO2 -> 0.5 HONO + 0.5 HNO3                                                                                                                         | EXTRA 95 1.654                     |
| 340 | BENZ3OH + OH -> 7.000E-02 BENZ2OH1O + 7.300E-01 BENZ4OH + 7.300E-01 HO2 + 7.000E-02 PBZQOH + 1.300E-01 BENZ3OHBIPERO2                              | ARR 4.64E-10 0 0                   |
| 341 | BENZ4OH + OH -> 7.000E-02 BENZ3OH1O + 7.300E-01 BENZ5OH + 7.300E-01 HO2 + 7.000E-02 PBZQ3OH + 1.300E-01 BENZ4OHBIPERO2                             | ARR 1.05E-09 0 0                   |
| 342 | CATECBIPERO2 + NO -> CATECBIPERO + NO2                                                                                                             | ARR 2.700E-12 0 -360.00            |
| 343 | CATECBIPERO2 + NO3 -> CATECBIPERO + NO2                                                                                                            | ARR 2.300E-12 0 0                  |
| 344 | CATECBIPERO2 + HO2 -> CATECBIPEROOH                                                                                                                | ARR 2.241E-13 0 -1300.00           |
| 345 | CATECBIPERO2 -> 7.000E-01 CATECBIPERO + 3.000E-01 CATECBIPER2OH                                                                                    | RO2 1 ARR 8.800E-13 0 0            |
| 346 | CATECBIPERO -> 0.330 MALDALCO2HOH + 0.330 GLY + 0.165 MALDIAL + 0.165 ACOX + 0.330 MALDALCO2H + 0.330 HCOCO2H + 0.165 MALDIAL2OH + 0.165 GLY + HO2 | ARR 1.000E+06 0 0                  |
| 347 | CATECBIPEROOH -> CATECBIPERO + OH                                                                                                                  | EXTRA 91 7.649E-06 0.682 0.279 1.0 |
| 348 | CATECBIPEROOH + OH -> CATECBIPERO2                                                                                                                 | ARR 1.16E-10 0 0                   |

|     |                                                                                                                             |                                    |
|-----|-----------------------------------------------------------------------------------------------------------------------------|------------------------------------|
| 349 | CATECBIPER2OH + OH -> CATECBIPERO                                                                                           | ARR 1.130E-10 0 0                  |
| 350 | BENZ3OHBIPERO2 + NO -> BENZ3OHBIPERO + NO2                                                                                  | ARR 2.700E-12 0 -360.00            |
| 351 | BENZ3OHBIPERO2 + NO3 -> BENZ3OHBIPERO + NO2                                                                                 | ARR 2.300E-12 0 0                  |
| 352 | BENZ3OHBIPERO2 + HO2 -> BENZ3OHBIPEROOH                                                                                     | ARR 2.241E-13 0 -1300.00           |
| 353 | BENZ3OHBIPERO2 -> 7.000E-01 BENZ3OHBIPERO + 3.000E-01 BENZ3OHBIPER2OH                                                       | RO2 1 ARR 8.800E-13 0 0            |
| 354 | BENZ3OHBIPERO -> 0.500 MALDALCO2H2OH + 0.500 GLY + 0.250 MALDALCO2HOH + 0.250 HCOCO2H + 0.250 MALDALCO2H + 0.250 ACOX + HO2 | ARR 1.000E+06 0 0                  |
| 355 | BENZ3OHBIPEROOH -> BENZ3OHBIPERO + OH                                                                                       | EXTRA 91 7.649E-06 0.682 0.279 1.0 |
| 356 | BENZ3OHBIPEROOH + OH -> BENZ3OHBIPERO2                                                                                      | ARR 9.770E-11 0 0                  |
| 357 | BENZ3OHBIPER2OH + OH -> BENZ3OHBIPERO                                                                                       | ARR 1.210E-10 0 0                  |
| 358 | BENZ4OHBIPERO2 + NO -> BENZ4OHBIPERO + NO2                                                                                  | ARR 2.700E-12 0 -360.00            |
| 359 | BENZ4OHBIPERO2 + NO3 -> BENZ4OHBIPERO + NO2                                                                                 | ARR 2.300E-12 0 0                  |
| 360 | BENZ4OHBIPERO2 + HO2 -> BENZ4OHBIPEROOH                                                                                     | ARR 2.241E-13 0 -1300.00           |
| 361 | BENZ4OHBIPERO2 -> 7.000E-01 BENZ4OHBIPERO + 3.000E-01 BENZ4OHBIPER2OH                                                       | RO2 1 ARR 8.800E-13 0 0            |
| 362 | BENZ4OHBIPERO -> 0.250 ACMAL2OH + 0.250 GLY + 0.5 MALDALCO2H2OH + 0.5 HCOCO2H + 0.250 MALDALCO2HOH + 0.250 ACOX + HO2       | ARR 1.000E+06 0 0                  |
| 363 | BENZ4OHBIPEROOH -> BENZ4OHBIPERO + OH                                                                                       | EXTRA 91 7.649E-06 0.682 0.279 1.0 |
| 364 | BENZ4OHBIPEROOH + OH -> BENZ4OHBIPERO2                                                                                      | ARR 9.770E-11 0 0                  |
| 365 | BENZ4OHBIPER2OH + OH -> BENZ4OHBIPERO                                                                                       | ARR 1.210E-10 0 0                  |
| 366 | BENZ2OH1O + NO2 -> NBENZ3OH                                                                                                 | ARR 2.080E-12 0 0                  |
| 367 | BENZ2OH1O + O3 -> BENZ2OHO2                                                                                                 | ARR 2.860E-13 0 0                  |
| 368 | BENZ2OHO2 + NO -> BENZ2OH1O + NO2                                                                                           | ARR 2.700E-12 0 -360.00            |
| 369 | BENZ2OHO2 + NO3 -> BENZ2OH1O + NO2                                                                                          | ARR 2.300E-12 0 0                  |
| 370 | BENZ2OHO2 + HO2 -> BENZ2OHOOH                                                                                               | ARR 2.241E-13 0 -1300.00           |
| 371 | BENZ2OHO2 -> BENZ2OH1O                                                                                                      | RO2 1 ARR 8.800E-13 0 0            |
| 372 | BENZ2OHOOH -> BENZ2OH1O + OH                                                                                                | EXTRA 91 7.649E-06 0.682 0.279 1.0 |
| 373 | BENZ2OHOOH + OH -> BENZ2OHO2                                                                                                | ARR 4.65E-10 0 0                   |
| 374 | NBENZ3OH + OH -> NBENZ3OHO2                                                                                                 | ARR 4.59E-11 0 0                   |
| 375 | NBENZ3OH + NO3 -> NNBENZ3OHO2                                                                                               | ARR 2.600E-12 0 0                  |
| 376 | NBENZ3OHO2 + NO -> NBENZ3OHO + NO2                                                                                          | ARR 2.700E-12 0 -360.00            |
| 377 | NBENZ3OHO2 + NO3 -> NBENZ3OHO + NO2                                                                                         | ARR 2.300E-12 0 0                  |
| 378 | NBENZ3OHO2 + HO2 -> NBENZ3OHOOH                                                                                             | ARR 2.241E-13 0 -1300.00           |
| 379 | NBENZ3OHO2 -> NBENZ3OHO                                                                                                     | RO2 1 ARR 8.000E-13 0 0            |
| 380 | NBENZ3OHO -> HCOCO2H + HO2 + NC4DCO2HOH                                                                                     | ARR 1.000E+06 0 0                  |
| 381 | NBENZ3OHOOH -> NBENZ3OHO + OH                                                                                               | EXTRA 91 7.649E-06 0.682 0.279 1.0 |
| 382 | NBENZ3OHOOH + OH -> NBENZ3OHO2                                                                                              | ARR 1.900E-12 0 -190.00            |
| 383 | NNBENZ3OHO2 + NO -> NNBENZ3OHO + NO2                                                                                        | ARR 2.700E-12 0 -360.00            |
| 384 | NNBENZ3OHO2 + NO3 -> NNBENZ3OHO + NO2                                                                                       | ARR 2.300E-12 0 0                  |
| 385 | NNBENZ3OHO2 + HO2 -> NNBENZ3OHOOH                                                                                           | ARR 2.241E-13 0 -1300.00           |
| 386 | NNBENZ3OHO2 -> NNBENZ3OHO                                                                                                   | RO2 1 ARR 8.000E-13 0 0            |
| 387 | NNBENZ3OHO -> HCOCO2H + NC4DCO2HOH + NO2                                                                                    | ARR 1.000E+06 0 0                  |
| 388 | NNBENZ3OHOOH -> NNBENZ3OHO + OH                                                                                             | EXTRA 91 7.649E-06 0.682 0.279 1.0 |
| 389 | NNBENZ3OHOOH + OH -> NNBENZ3OHO2                                                                                            | ARR 1.900E-12 0 -190.00            |
| 390 | BENZ3OH1O + NO2 -> NBENZ4OH                                                                                                 | ARR 2.080E-12 0 0                  |
| 391 | BENZ3OH1O + O3 -> BENZ3OHO2                                                                                                 | ARR 2.860E-13 0 0                  |
| 392 | BENZ3OHO2 + NO -> BENZ3OH1O + NO2                                                                                           | ARR 2.700E-12 0 -360.00            |

|     |                                                                                 |                                    |
|-----|---------------------------------------------------------------------------------|------------------------------------|
| 393 | BENZ3OHO2 + NO3 -> BENZ3OH1O + NO2                                              | ARR 2.300E-12 0 0                  |
| 394 | BENZ3OHO2 + HO2 -> BENZ3OHOOH                                                   | ARR 2.241E-13 0 -1300.00           |
| 395 | BENZ3OHO2 -> BENZ3OH1O                                                          | RO2 1 ARR 8.800E-13 0 0            |
| 396 | BENZ3OHOOH -> BENZ3OH1O + OH                                                    | EXTRA 91 7.649E-06 0.682 0.279 1.0 |
| 397 | BENZ3OHOOH + OH -> BENZ3OHO2                                                    | ARR 1.900E-12 0 -190.00            |
| 398 | NBENZ4OH + OH -> NBENZ4OHO2                                                     | ARR 3.470E-12 0 0                  |
| 399 | NBENZ4OH + NO3 -> NNBNZ4OHO2                                                    | ARR 2.600E-12 0 0                  |
| 400 | NBENZ4OHO2 + NO -> NBENZ4OHO + NO2                                              | ARR 2.700E-12 0 -360.00            |
| 401 | NBENZ4OHO2 + NO3 -> NBENZ4OHO + NO2                                             | ARR 2.300E-12 0 0                  |
| 402 | NBENZ4OHO2 + HO2 -> NBENZ4OHOOH                                                 | ARR 2.241E-13 0 -1300.00           |
| 403 | NBENZ4OHO2 -> NBENZ4OHO                                                         | RO2 1 ARR 8.000E-13 0 0            |
| 404 | NBENZ4OHO -> ACOX + HO2 + NC4DCO2HOH                                            | ARR 1.000E+06 0 0                  |
| 405 | NBENZ4OHOOH -> NBENZ4OHO + OH                                                   | EXTRA 91 7.649E-06 0.682 0.279 1.0 |
| 406 | NBENZ4OHOOH + OH -> NBENZ4OHO2                                                  | ARR 1.900E-12 0 -190.00            |
| 407 | NNBNZ4OHO2 + NO -> NNBNZ4OHO + NO2                                              | ARR 2.700E-12 0 -360.00            |
| 408 | NNBNZ4OHO2 + NO3 -> NNBNZ4OHO + NO2                                             | ARR 2.300E-12 0 0                  |
| 409 | NNBNZ4OHO2 + HO2 -> NNBNZ4OHOOH                                                 | ARR 2.241E-13 0 -1300.00           |
| 410 | NNBNZ4OHO2 -> NNBNZ4OHO                                                         | RO2 1 ARR 8.000E-13 0 0            |
| 411 | NNBNZ4OHO -> ACOX + NC4DCO2HOH + NO2                                            | ARR 1.000E+06 0 0                  |
| 412 | NNBNZ4OHOOH -> NNBNZ4OHO + OH                                                   | EXTRA 91 7.649E-06 0.682 0.279 1.0 |
| 413 | NNBNZ4OHOOH + OH -> NNBNZ4OHO2                                                  | ARR 1.900E-12 0 -190.00            |
| 414 | BZBIPERO2 -> PC2                                                                | ARR 5.00E-3 0 0                    |
| 415 | PC2 -> R1bRO2                                                                   | ARR 2.3E2 0 0                      |
| 416 | R1bRO2 -> C6H7O7                                                                | ARR 2.3E2 0 0                      |
| 417 | C6H7O7 -> C6H7O9                                                                | ARR 2E2 0 0                        |
| 418 | C6H7O9 + HO2 -> C6H8O9                                                          | ARR 0.266E-12 0 -1300.             |
| 419 | C6H7O9 + NO -> C6H7O10N                                                         | ARR 5.52E-13 0 -360.               |
| 420 | gdBPR_PHEN + NO ->                                                              | ARR 2.542E-12 0 -360.              |
| 421 | gdBPR_PHEN + HO2 ->                                                             | ARR 0.239E-12 0 -1300.             |
| 422 | gdBPR_PHEN -> C6H7O6                                                            | ARR 9400 0 0                       |
| 423 | C6H7O6 -> C6H7O8                                                                | ARR 4.4 0 0                        |
| 424 | C6H7O8 + HO2 -> C6H8O8                                                          | ARR 0.239E-12 0 -1300.             |
| 425 | C6H7O8 + NO -> C6H7O9N                                                          | ARR 5.19e-13 0 -360.               |
| 426 | gdBPR_CAT + NO ->                                                               | ARR 2.542E-12 0 -360.              |
| 427 | gdBPR_CAT + HO2 ->                                                              | ARR 0.239E-12 0 -1300.             |
| 428 | gdBPR_CAT -> cat_PC2                                                            | ARR 19.2 0 0                       |
| 429 | cat_PC2 -> 0.5 C6H6O7 + 0.5 C6H7O9gd                                            | ARR 3.9 0 0                        |
| 430 | C6H7O9gd -> C6H7O11                                                             | ARR 3.6 0 0                        |
| 431 | C6H7O11 + HO2 -> C6H8O11                                                        | ARR 0.239E-12 0 -1300.             |
| 432 | C6H7O11 + NO -> C6H7O12N                                                        | ARR 1.28E-13 0 -360.               |
| 433 | KETENOL -> 0.76 BZFUONE + 0.24 KETB                                             | ARR 3.800E-03 0 0                  |
| 434 | KETB -> MALANHYO2 + HO2                                                         | ARR 2.600E-3 0 0                   |
| 435 | MALANHYO2 + HO2 -> MALANHY + HO2 + OH                                           | ARR 2.910E-13 0 -1300.0            |
| 436 | MALANHYO2 + NO -> 0.85 MALANHY + 0.85 NO2 + 0.85 HO2 + 0.15 MALANHYONO2         | ARR 2.700E-12 0 -360.00            |
| 437 | MALANHYO2 -> MALANHY + HO2                                                      | RO2 1 ARR 8.8e-13 0 0              |
| 438 | KETENOL + OH -> 0.64 MALDALCO2H + 0.64 HO2 + 0.36 ORA1 + 0.36 KETENAL + 0.36 OH | ARR 1.18e-10 0 0                   |

|     |                                                                                                                               |                                    |
|-----|-------------------------------------------------------------------------------------------------------------------------------|------------------------------------|
| 439 | KETENOL + O3 -> 0.16 KETENAL + 0.16 OH + 0.16 HO2 + 0.84 GLY + 0.84 ORA1                                                      | ARR 1.8e-15 0 0                    |
| 440 | KETENAL + OH -> GLY + OH                                                                                                      | ARR 1.0e-12 0 0                    |
| 441 | MALDALCO2H + OH -> 0.62 M1O2A + 0.38 C32OH13CO + 0.38 OH                                                                      | ARR 2.3e-11 0 0                    |
| 442 | M1O2A + NO -> GLY + HO2 + M1C2O2                                                                                              | ARR 2.700E-12 0 -360.00            |
| 443 | M1C2O2 + NO -> ORA1 + HO2                                                                                                     | ARR 2.700E-12 0 -360.00            |
| 444 | C2H4 + OH -> HOCH2CH2O2                                                                                                       | EXTRA 93 15 1.0                    |
| 445 | C2H4 + O3 -> CH2OOA + HCHO                                                                                                    | ARR 9.100E-15 0 2580.00            |
| 446 | C2H4 + NO3 -> ETHENO3O2                                                                                                       | ARR 3.300E-12 0 2880.00            |
| 447 | HOCH2CH2O2 + NO -> 9.950E-01 HOCH2CH2O + 9.950E-01 NO2 + 5.000E-03 ETHOHNO3                                                   | ARR 2.700E-12 0 -360.00            |
| 448 | HOCH2CH2O2 + NO3 -> HOCH2CH2O + NO2                                                                                           | ARR 2.300E-12 0 0                  |
| 449 | HOCH2CH2O2 + HO2 -> HYETHO2H                                                                                                  | ARR 1.530E-13 0 -1300.00           |
| 450 | HOCH2CH2O2 -> 6.000E-01 HOCH2CH2O + 2.000E-01 ETHGLY + 2.000E-01 HOCH2CHO                                                     | RO2 1 ARR 1.7926e-13 0 -682.5      |
| 451 | HOCH2CH2O -> 2.000E+00 HCHO + HO2                                                                                             | ARR 9.500E+13 0 5988.00            |
| 452 | HOCH2CH2O -> HO2 + HOCH2CHO                                                                                                   | TB O2 ARR 2.500E-14 0 300.00       |
| 453 | ETHOHNO3 + OH -> HOCH2CHO + NO2                                                                                               | ARR 8.400E-13 0 0                  |
| 454 | HYETHO2H -> HOCH2CH2O + OH                                                                                                    | EXTRA 91 7.649E-06 0.682 0.279 1.0 |
| 455 | HYETHO2H + OH -> HOCH2CH2O2                                                                                                   | ARR 1.900E-12 0 -190.00            |
| 456 | HYETHO2H + OH -> HOCH2CHO + OH                                                                                                | ARR 1.380E-11 0 0                  |
| 457 | CH2OO + NO -> HCHO + NO2                                                                                                      | ARR 1.000E-14 0 0                  |
| 458 | CH2OO + NO2 -> HCHO + NO3                                                                                                     | ARR 1.000E-15 0 0                  |
| 459 | CH2OO + SO2 -> HCHO + SO3                                                                                                     | ARR 7.000E-14 0 0                  |
| 460 | CH2OO -> ORA1                                                                                                                 | TB H2O ARR 1.000E-17 0 0           |
| 461 | CH2OO -> H2O2 + HCHO                                                                                                          | TB H2O ARR 6.000E-18 0 0           |
| 462 | CH2OO + CO -> HCHO                                                                                                            | ARR 1.200E-15 0 0                  |
| 463 | CH2OOA -> 3.700E-01 CH2OO                                                                                                     | ARR 1.000E+06 0 0                  |
| 464 | ETHENO3O2 + NO -> ETHENO3O + NO2                                                                                              | ARR 2.700E-12 0 -360.00            |
| 465 | ETHENO3O2 + HO2 -> ETHO2HNO3                                                                                                  | ARR 1.126E-13 0 -1300.00           |
| 466 | ETHENO3O2 + NO3 -> ETHENO3O + NO2                                                                                             | ARR 2.300E-12 0 0                  |
| 467 | ETHENO3O2 -> 6.000E-01 ETHENO3O + 2.000E-01 ETHOHNO3 + 2.000E-01 NO3CH2CHO                                                    | RO2 1 ARR 6.000E-13 0 0            |
| 468 | ETHENO3O -> HO2 + NO3CH2CHO                                                                                                   | TB O2 ARR 2.500E-14 0 300.00       |
| 469 | ETHENO3O -> 2.000E+00 HCHO + NO2                                                                                              | ARR 7.000E+03 0 0                  |
| 470 | ETHO2HNO3 -> ETHENO3O + OH                                                                                                    | EXTRA 91 7.649E-06 0.682 0.279 1.0 |
| 471 | ETHO2HNO3 + OH -> ETHENO3O2                                                                                                   | ARR 1.900E-12 0 -190.00            |
| 472 | ETHO2HNO3 + OH -> NO3CH2CHO + OH                                                                                              | ARR 1.620E-12 0 0                  |
| 473 | NO3CH2CHO -> HCOCH2O + NO2                                                                                                    | EXTRA 91 3.246E-05 1.015 0.324 1.0 |
| 474 | NO3CH2CHO + OH -> NO3CH2CO3                                                                                                   | ARR 3.400E-12 0 0                  |
| 475 | NO3CH2CHO + NO3 -> HNO3 + NO3CH2CO3                                                                                           | ARR 1.400E-12 0 1860.00            |
| 476 | NO3CH2CO3 + NO -> HCHO + 2.000E+00 NO2                                                                                        | ARR 7.500E-12 0 -290.00            |
| 477 | NO3CH2CO3 + NO2 -> NO3CH2PAN                                                                                                  | EXTRA 93 21 1.0                    |
| 478 | NO3CH2CO3 + NO3 -> HCHO + 2.000E+00 NO2                                                                                       | ARR 4.002E-12 0 0                  |
| 479 | NO3CH2CO3 + HO2 -> 4.100E-01 NO3CH2CO3H + 1.500E-01 NO3CH2CO2H + 1.500E-01 O3 + 4.400E-01 HCHO + 4.400E-01 NO2 + 4.400E-01 OH | ARR 5.200E-13 0 -980.00            |
| 480 | NO3CH2CO3 -> 7.000E-01 HCHO + 7.000E-01 NO2 + 3.000E-01 NO3CH2CO2H                                                            | RO2 1 ARR 1.000E-11 0 0            |
| 481 | NO3CH2PAN -> NO2 + NO3CH2CO3                                                                                                  | EXTRA 93 22 1.0                    |
| 482 | NO3CH2PAN + OH -> HCHO + 2.000E+00 NO2                                                                                        | ARR 1.120E-14 0 0                  |

|     |                                                                                                             |                                    |
|-----|-------------------------------------------------------------------------------------------------------------|------------------------------------|
| 483 | NO3CH2CO3H -> HCHO + NO2 + OH                                                                               | EXTRA 91 7.649E-06 0.682 0.279 1.0 |
| 484 | NO3CH2CO3H + OH -> NO3CH2CO3                                                                                | ARR 3.630E-12 0 0                  |
| 485 | NO3CH2CO2H + OH -> HCHO + NO2                                                                               | ARR 1.680E-13 0 0                  |
| 486 | CH2OOB -> 2.400E-01 CH2OO + 7.600E-01 CO + 3.600E-01 HO2 + 3.600E-01 OH                                     | ARR 1.000E+06 0 0                  |
| 487 | HOCH2COCHO -> CO + HO2 + HOCH2CO3                                                                           | EXTRA 91 1.537E-04 0.170 0.208 1.0 |
| 488 | HOCH2COCHO + OH -> CO + HOCH2CO3                                                                            | ARR 1.440E-11 0 0                  |
| 489 | HOCH2COCHO + NO3 -> CO + HNO3 + HOCH2CO3                                                                    | ARR 3.360E-12 0 1860.00            |
| 490 | C42AOH -> CO + 2.000E+00 HO2 + NO3CH2CHO                                                                    | EXTRA 91 2.792E-05 0.805 0.338 1.0 |
| 491 | C42AOH + OH -> HO2 + NMGLYOX                                                                                | ARR 2.920E-11 0 0                  |
| 492 | NMGLYOX -> CO + HO2 + NO3CH2CO3                                                                             | EXTRA 91 1.537E-04 0.170 0.208 1.0 |
| 493 | NMGLYOX -> 2.000E+00 CO + HCHO + HO2 + NO2                                                                  | EXTRA 91 2.485E-06 1.196 0.328 1.0 |
| 494 | NMGLYOX + OH -> CO + NO3CH2CO3                                                                              | ARR 1.240E-11 0 0                  |
| 495 | NMGLYOX + NO3 -> CO + HNO3 + NO3CH2CO3                                                                      | ARR 3.360E-12 0 1860.00            |
| 496 | GLYOOB -> 2.400E-01 GLYOO + 9.200E-01 CO + 7.600E-01 HO2 + 3.600E-01 OH + 2.000E-01 HCHO                    | ARR 1.000E+06 0 0                  |
| 497 | C3DIOLO2 + NO -> C3DIOLO + NO2                                                                              | ARR 2.700E-12 0 -360.00            |
| 498 | C3DIOLO2 + NO3 -> C3DIOLO + NO2                                                                             | ARR 2.300E-12 0 0                  |
| 499 | C3DIOLO2 + HO2 -> C3DIOLOOH                                                                                 | ARR 1.513E-13 0 -1300.00           |
| 500 | C3DIOLO2 -> C3DIOLO                                                                                         | RO2 1 ARR 2.000E-12 0 0            |
| 501 | C3DIOLO -> HCHO + HO2 + HOCH2CHO                                                                            | ARR 1.000E+06 0 0                  |
| 502 | C3DIOLOOH + OH -> C3DIOLO2                                                                                  | ARR 2.780E-11 0 0                  |
| 503 | C3DIOLOOH -> C3DIOLO + OH                                                                                   | EXTRA 91 7.649E-06 0.682 0.279 1.0 |
| 504 | ETHGLY + OH -> HO2 + HOCH2CHO                                                                               | ARR 1.450E-11 0 0                  |
| 505 | A2PANOO + HO2 -> 4.400E-01 A2PANO + 4.400E-01 OH + 4.100E-01 C2OHOCO2H + 1.500E-01 C2OHOCO2H + 1.500E-01 O3 | ARR 5.200E-13 0 -980.00            |
| 506 | A2PANOO + NO -> A2PANO + NO2                                                                                | ARR 7.500E-12 0 -290.00            |
| 507 | A2PANOO + NO3 -> A2PANO + NO2                                                                               | ARR 4.002E-12 0 0                  |
| 508 | A2PANOO + NO2 -> A2PAN                                                                                      | EXTRA 93 21 1.0                    |
| 509 | A2PANOO -> 7.000E-01 A2PANO + 3.000E-01 C2OHOCO2H                                                           | RO2 1 ARR 1.000E-11 0 0            |
| 510 | ACR + OH -> ACO3                                                                                            | ARR 1.360E-11 0 0                  |
| 511 | ACR + OH -> OCCO2HCO2                                                                                       | ARR 1.300E-12 0 0                  |
| 512 | ACR + OH -> ACRO2                                                                                           | ARR 5.100E-12 0 0                  |
| 513 | ACR -> 4.000E-01 C2H4 + 3.000E-01 HCHO + 3.000E-01 ACO3                                                     | EXTRA 91 1.140E-05 0.396 0.298 1.0 |
| 514 | ACR + NO3 -> ACO3 + HNO3                                                                                    | ARR 1.720E-13 0 1190.00            |
| 515 | ACR + O3 -> CH2OOB + GLY                                                                                    | ARR 1.450E-19 0 0                  |
| 516 | ACR + O3 -> GLYOOB + HCHO                                                                                   | ARR 1.450E-19 0 0                  |
| 517 | OCCO2HCO2 + NO -> NO2 + OCCO2HCO                                                                            | ARR 2.565E-12 0 -360.00            |
| 518 | OCCO2HCO2 + NO -> C42AOH                                                                                    | ARR 1.350E-13 0 -360.00            |
| 519 | OCCO2HCO2 + NO3 -> C42AOH + NO2                                                                             | ARR 2.300E-12 0 0                  |
| 520 | OCCO2HCO2 + HO2 -> OCCO2HCOOH                                                                               | ARR 9.079E-14 0 -1300.00           |
| 521 | OCCO2HCO2 + HO2 -> C32OH13CO + 5.200E-01 O3                                                                 | ARR 6.053E-14 0 -1300.00           |
| 522 | OCCO2HCO2 -> 6.000E-01 OCCO2HCO + 2.000E-01 C32OH13CO + 2.000E-01 OCCO2HCOH                                 | RO2 1 ARR 2.000E-12 0 0            |
| 523 | OCCO2HCO -> GLY + HCHO + HO2                                                                                | ARR 1.000E+06 0 0                  |
| 524 | OCCO2HCOOH -> OCCO2HCO + OH                                                                                 | EXTRA 91 7.649E-06 0.682 0.279 1.0 |
| 525 | OCCO2HCOOH + OH -> OCCO2HCO2                                                                                | ARR 9.258E-11 0 0                  |
| 526 | OCCO2HCOH + OH -> A2PANOO                                                                                   | ARR 6.220E-11 0 0                  |
| 527 | A2PAN -> A2PANOO + NO2                                                                                      | EXTRA 93 22 1.0                    |

|     |                                                                                                                                                                                                                                                                                                                                                                                  |                                    |
|-----|----------------------------------------------------------------------------------------------------------------------------------------------------------------------------------------------------------------------------------------------------------------------------------------------------------------------------------------------------------------------------------|------------------------------------|
| 528 | A2PAN + OH -> CO + HOCH2CHO + NO2                                                                                                                                                                                                                                                                                                                                                | ARR 1.865E-11 0 0                  |
| 529 | C2OHOCOOH -> C3DIOL2                                                                                                                                                                                                                                                                                                                                                             | EXTRA 91 7.649E-06 0.682 0.279 1.0 |
| 530 | C2OHOCOOH + OH -> A2PANOO                                                                                                                                                                                                                                                                                                                                                        | ARR 1.513E-11 0 0                  |
| 531 | C2OHOCO2H + OH -> C3DIOL2                                                                                                                                                                                                                                                                                                                                                        | ARR 1.867E-11 0 0                  |
| 532 | A2PANO -> HO2 + HOCH2CHO                                                                                                                                                                                                                                                                                                                                                         | ARR 1.000E+06 0 0                  |
| 533 | ACRO2 + NO -> CHOCO2HCO + NO2                                                                                                                                                                                                                                                                                                                                                    | ARR 2.700E-12 0 -360.00            |
| 534 | ACRO2 + NO3 -> CHOCO2HCO + NO2                                                                                                                                                                                                                                                                                                                                                   | ARR 2.300E-12 0 0                  |
| 535 | ACRO2 + HO2 -> HOCHOCOOH                                                                                                                                                                                                                                                                                                                                                         | ARR 1.513E-13 0 -1300.00           |
| 536 | ACRO2 -> 6.000E-01 CHOCO2HCO + 2.000E-01 HOCH2COCHO + 2.000E-01 OCCO2HCOH                                                                                                                                                                                                                                                                                                        | RO2 1 ARR 8.800E-13 0 0            |
| 537 | ACRO2 -> CO + HOCH2CHO + OH                                                                                                                                                                                                                                                                                                                                                      | ARR 3.000E+07 0 5300.00            |
| 538 | CHOCO2HCO -> CO + HO2 + HOCH2CHO                                                                                                                                                                                                                                                                                                                                                 | ARR 1.000E+06 0 0                  |
| 539 | HOCHOCOOH + OH -> HOCH2COCHO + OH                                                                                                                                                                                                                                                                                                                                                | ARR 4.770E-11 0 0                  |
| 540 | HOCHOCOOH -> CHOCO2HCO + OH                                                                                                                                                                                                                                                                                                                                                      | EXTRA 91 7.649E-06 0.682 0.279 1.0 |
| 541 | ACOX + OH ->                                                                                                                                                                                                                                                                                                                                                                     | ARR 5.74E-14 0 -880                |
| 542 | MALDIAL2OH + OH ->                                                                                                                                                                                                                                                                                                                                                               | ARR 3.82E-11 0 0                   |
| 543 | MALDIAL2OH + O3 ->                                                                                                                                                                                                                                                                                                                                                               | ARR 3.60E-18 0 0                   |
| 544 | MALDIAL2OH + NO3 ->                                                                                                                                                                                                                                                                                                                                                              | ARR 8.35E-12 0 0                   |
| 545 | MALDALCO2HOH + OH ->                                                                                                                                                                                                                                                                                                                                                             | ARR 3.82E-11 0 0                   |
| 546 | MALDALCO2HOH + O3 ->                                                                                                                                                                                                                                                                                                                                                             | ARR 3.60E-18 0 0                   |
| 547 | MALDALCO2HOH + NO3 ->                                                                                                                                                                                                                                                                                                                                                            | ARR 8.35E-12 0 0                   |
| 548 | MALDALCO2H2OH + OH ->                                                                                                                                                                                                                                                                                                                                                            | ARR 4.69E-11 0 0                   |
| 549 | MALDALCO2H2OH + NO3 ->                                                                                                                                                                                                                                                                                                                                                           | ARR 8.03E-15 0 0                   |
| 550 | ACMAL2OH + OH ->                                                                                                                                                                                                                                                                                                                                                                 | ARR 2.58E-11 0 0                   |
| 551 | ACMAL2OH + NO3 ->                                                                                                                                                                                                                                                                                                                                                                | ARR 3.40E-13 0 0                   |
| 552 | PBZQ1OH + OH ->                                                                                                                                                                                                                                                                                                                                                                  | ARR 9.180E-11 0 0                  |
| 553 | PBZQ3OH + OH ->                                                                                                                                                                                                                                                                                                                                                                  | ARR 9.180E-11 0 0                  |
| 554 | NBENZ3OH + OH ->                                                                                                                                                                                                                                                                                                                                                                 | ARR 0.683E-11 0 0                  |
| 555 | NBENZ3OH + NO3 ->                                                                                                                                                                                                                                                                                                                                                                | ARR 0.503E-11 0 0                  |
| 556 | NBENZ4OH + OH ->                                                                                                                                                                                                                                                                                                                                                                 | ARR 0.683E-11 0 0                  |
| 557 | NBENZ4OH + NO3 ->                                                                                                                                                                                                                                                                                                                                                                | ARR 0.503E-11 0 0                  |
| 558 | C6DIALPEROHONO2 + OH ->                                                                                                                                                                                                                                                                                                                                                          | ARR 6.75E-11 0 0                   |
| 559 | C6DIALPEROHONO2 + OH ->                                                                                                                                                                                                                                                                                                                                                          | ARR 6.75E-11 0 0                   |
| 560 | C6DIALPEROHONO2 + NO3 ->                                                                                                                                                                                                                                                                                                                                                         | ARR 5.12E-13 0 0                   |
| 561 | MALDIALONO2 + OH ->                                                                                                                                                                                                                                                                                                                                                              | ARR 3.21E-11 0 0                   |
| 562 | MALDIALONO2 + NO3 ->                                                                                                                                                                                                                                                                                                                                                             | ARR 4.83E-13 0 0                   |
| 563 | NC4DCO2HOH + OH ->                                                                                                                                                                                                                                                                                                                                                               | ARR 5.26E-12 0 -490.00             |
| 564 | NC4DCO2HOH + NO3 ->                                                                                                                                                                                                                                                                                                                                                              | ARR 2.15E-14 0 0                   |
| 565 | C6H6O3 + OH -> C6H6O3_1                                                                                                                                                                                                                                                                                                                                                          | ARR 5.038E-12 0 -630.              |
| 566 | C6H6O3 + O3 -> 0.043 C6H6O3_12 + 0.086 HO2 + 0.043 CO2 + 0.554 C6H6O3_12 + 1.208 HO2 + 0.704 CO2 + 0.043 C6H6O3_12 + 0.086 HO2 + 0.043 CO2 + 0.005 C6H6O3_28 + 0.005 C6H6O3_29 + 0.031 C6H6O3_28 + 0.031 C6H6O3_29 + 0.0156 C6H6O3_2 + 0.0234 CO2 + 0.0156 HO2 + 0.0078 C6H6O3_24 + 0.0156 C6H6O3_19 + 0.0156 CO + 0.100 C6H6O3_2 + 0.050 C6H6O3_24 + 0.100 C6H6O3_19 + 0.100 CO | ARR 3.012E-16 0 1008.              |
| 567 | C6H6O3 + O3 -> 0.004 C6H6O3_31 + 0.004 C6H6O3_32 + 0.026 C6H6O3_31 + 0.026 C6H6O3_32 + 0.0128 C6H6O3_3 + 0.0192 CO2 + 0.0128 HO2 + 0.0064 C6H6O3_26 + 0.0128 C6H6O3_21 + 0.0128 CO + 0.082 C6H6O3_3 + 0.489 CO2 + 0.326 HO2 + 0.041 C6H6O3_26 + 0.082 C6H6O3_21 + 0.326 CO + 0.0188 C6H6O3_4 + 0.0282 CO2 + 0.0188 HO2 + 0.0094 C6H6O3_23 + 0.0188                               | ARR 3.012E-16 0 1008.              |

|     |                                                                                                                                                                          |                                                                                                                                     |
|-----|--------------------------------------------------------------------------------------------------------------------------------------------------------------------------|-------------------------------------------------------------------------------------------------------------------------------------|
|     | C6H6O3_16 + 0.0188 CO + 0.244 C6H6O3_4 + 0.122 C6H6O3_23 + 0.244 C6H6O3_16 + 0.0188 C6H6O3_4 + 0.0282 CO2 + 0.0188 HO2 + 0.0094 C6H6O3_23 + 0.0188 C6H6O3_16 + 0.0188 CO |                                                                                                                                     |
| 568 | C6H6O3 + NO3 -> C6H6O3_5                                                                                                                                                 | ARR 5.569E-12 0 0                                                                                                                   |
| 569 | C6H6O3_1 + NO -> NO2 + C6H6O3_6                                                                                                                                          | ARR 2.203E-12 0 -360.                                                                                                               |
| 570 | C6H6O3_1 + NO -> C6H6O3_14                                                                                                                                               | ARR 4.972E-13 0 -360.                                                                                                               |
| 571 | C6H6O3_1 + HO2 -> 0.920 C6H6O3_10 + 0.080 C6H6O3_6 + 0.080 OH                                                                                                            | ARR 2.519E-13 0 -1300.                                                                                                              |
| 572 | C6H6O3_1 + NO3 -> C6H6O3_6 + NO2                                                                                                                                         | ARR 8.900E-12 0 390.                                                                                                                |
| 573 | C6H6O3_1 -> 0.600 C6H6O3_6 + 0.200 C6H6O3_35 + 0.200 C6H6O3_40                                                                                                           | RO2 1 ARR 1.000E-13 0 -973.                                                                                                         |
| 574 | C6H6O3_2 -> C6H6O3_7 + GLY                                                                                                                                               | ARR 1.120E+09 0 2768.                                                                                                               |
| 575 | C6H6O3_3 -> C6H6O3_22 + CO + HO2                                                                                                                                         | ARR 1.120E+09 0 3573.                                                                                                               |
| 576 | C6H6O3_4 + NO -> MALDALCO2H + CO2 + HO2 + NO2                                                                                                                            | ARR 7.500E-12 0 -290.                                                                                                               |
| 577 | C6H6O3_4 + NO2 -> C6H6O3_15                                                                                                                                              | ARR 6.143E-09 0 0                                                                                                                   |
| 578 | C6H6O3_4 + NO3 -> MALDALCO2H + CO2 + HO2 + NO2                                                                                                                           | ARR 8.900E-12 0 305.                                                                                                                |
| 579 | C6H6O3_4 + HO2 -> 0.370 C6H6O3_25 + 0.130 C6H6O3_16 + 0.130 O3 + 0.500 MALDALCO2H + 0.500 CO2 + 0.500 HO2 + 0.500 OH                                                     | ARR 3.058E-12 0 -730.                                                                                                               |
| 580 | C6H6O3_4 -> 0.800 MALDALCO2H + 0.800 CO2 + 0.800 HO2 + 0.200 C6H6O3_16                                                                                                   | RO2 1 ARR 2.000E-12 0 -508.                                                                                                         |
| 581 | C6H6O3_5 + NO -> NO2 + C6H6O3_8                                                                                                                                          | ARR 2.175E-12 0 -360.                                                                                                               |
| 582 | C6H6O3_5 + NO -> C6H6O3_13                                                                                                                                               | ARR 5.248E-13 0 -360.                                                                                                               |
| 583 | C6H6O3_5 + HO2 -> 0.500 C6H6O3_11 + 0.500 C6H6O3_8 + 0.500 OH                                                                                                            | ARR 2.659E-13 0 -1300.                                                                                                              |
| 584 | C6H6O3_5 + NO3 -> C6H6O3_8 + NO2                                                                                                                                         | ARR 8.900E-12 0 390.                                                                                                                |
| 585 | C6H6O3_5 -> 0.600 C6H6O3_8 + 0.200 C6H6O3_36 + 0.200 C6H6O3_41                                                                                                           | RO2 1 ARR 1.000E-13 0 -611.                                                                                                         |
| 586 | C6H6O3_6 -> C6H6O3_9 + HO2                                                                                                                                               | ARR 1.120E+09 0 2302.                                                                                                               |
| 587 | C6H6O3_7 + NO -> HCOCO2H + CO2 + HO2 + NO2                                                                                                                               | ARR 7.500E-12 0 -290.                                                                                                               |
| 588 | C6H6O3_7 + NO2 -> C6H6O3_18                                                                                                                                              | ARR 6.143E-09 0 0                                                                                                                   |
| 589 | C6H6O3_7 + NO3 -> HCOCO2H + CO2 + HO2 + NO2                                                                                                                              | ARR 8.900E-12 0 305.                                                                                                                |
| 590 | C6H6O3_7 + HO2 -> 0.370 C6H6O3_27 + 0.130 C6H6O3_39 + 0.130 O3 + 0.500 HCOCO2H + 0.500 CO2 + 0.500 HO2 + 0.500 OH                                                        | ARR 2.800E-12 0 -730.                                                                                                               |
| 591 | C6H6O3_7 -> 0.800 HCOCO2H + 0.800 CO2 + 0.800 HO2 + 0.200 C6H6O3_39                                                                                                      | RO2 1 ARR 2.000E-12 0 -508.                                                                                                         |
| 592 | C6H6O3_8 -> C6H6O3_9 + NO2                                                                                                                                               | ARR 1.120E+09 0 4428.                                                                                                               |
| 593 | C6H6O3_9 + OH ->                                                                                                                                                         | ARR 1.173E-11 0 -25.                                                                                                                |
| 594 | C6H6O3_9 + OH ->                                                                                                                                                         | ARR 1.303E-11 0 0                                                                                                                   |
| 595 | C6H6O3_9 + OH ->                                                                                                                                                         | ARR 1.823E-12 0 -395.                                                                                                               |
| 596 | C6H6O3_9 + OH ->                                                                                                                                                         | ARR 1.344E-12 0 -910.                                                                                                               |
| 597 | C6H6O3_9 + O3 ->                                                                                                                                                         | ARR 5.950E-18 0 0                                                                                                                   |
| 598 | C6H6O3_9 + NO3 ->                                                                                                                                                        | ARR 4.925E-15 0 0                                                                                                                   |
| 599 | C6H6O3_9 + NO3 ->                                                                                                                                                        | ARR 2.426E-15 0 0                                                                                                                   |
| 600 | C6H6O3_9 ->                                                                                                                                                              | PHOTOLYSIS 1.3993E-05 1.3687E-05 1.2773E-05 1.1268E-05 9.2156E-06 6.7805E-06 4.1825E-06 1.8855E-06 6.5962E-07 1.1592E-07 0.0000E+00 |
| 601 | C6H6O3_9 ->                                                                                                                                                              | PHOTOLYSIS 8.7717E-04 8.7094E-04 8.5109E-04 8.1417E-04 7.5391E-04 6.6369E-04 5.3173E-04 3.4985E-04 1.7813E-04 4.4607E-05 0.0000E+00 |
| 602 | C6H6O3_9 ->                                                                                                                                                              | PHOTOLYSIS 8.7717E-04 8.7094E-04 8.5109E-04 8.1417E-04 7.5391E-04 6.6369E-04 5.3173E-04 3.4985E-04 1.7813E-04 4.4607E-05 0.0000E+00 |
| 603 | C6H6O3_10 + OH ->                                                                                                                                                        | ARR 2.052E-13 0 -1693.                                                                                                              |
| 604 | C6H6O3_10 + OH ->                                                                                                                                                        | ARR 4.477E-12 0 -784.                                                                                                               |

|     |                    |                                                                                                                                              |
|-----|--------------------|----------------------------------------------------------------------------------------------------------------------------------------------|
| 605 | C6H6O3_10 + OH ->  | ARR 1.468E-12 0 -910.                                                                                                                        |
| 606 | C6H6O3_10 + O3 ->  | ARR 1.560E-18 0 0                                                                                                                            |
| 607 | C6H6O3_10 + NO3 -> | ARR 6.277E-15 0 0                                                                                                                            |
| 608 | C6H6O3_10 + NO3 -> | ARR 3.455E-15 0 0                                                                                                                            |
| 609 | C6H6O3_10 + NO3 -> | ARR 3.455E-15 0 0                                                                                                                            |
| 610 | C6H6O3_10 ->       | PHOTOLYSIS 7.1608E-06 7.0590E-06<br>6.7481E-06 6.2123E-06 5.4266E-06 4.3964E-06<br>3.1263E-06 1.7392E-06 7.6263E-07 1.7820E-07<br>0.0000E+00 |
| 611 | C6H6O3_11 + OH ->  | ARR 6.679E-14 0 -1403.                                                                                                                       |
| 612 | C6H6O3_11 + OH ->  | ARR 4.591E-12 0 -442.                                                                                                                        |
| 613 | C6H6O3_11 + OH ->  | ARR 1.432E-12 0 -910.                                                                                                                        |
| 614 | C6H6O3_11 + O3 ->  | ARR 1.560E-18 0 0                                                                                                                            |
| 615 | C6H6O3_11 + NO3 -> | ARR 3.666E-15 0 0                                                                                                                            |
| 616 | C6H6O3_11 + NO3 -> | ARR 3.666E-15 0 0                                                                                                                            |
| 617 | C6H6O3_11 ->       | PHOTOLYSIS 3.5767E-06 3.4991E-06<br>3.2674E-06 2.8868E-06 2.3685E-06 1.7539E-06<br>1.0960E-06 5.0716E-07 1.8427E-07 3.4435E-08<br>0.0000E+00 |
| 618 | C6H6O3_11 ->       | PHOTOLYSIS 7.1608E-06 7.0590E-06<br>6.7481E-06 6.2123E-06 5.4266E-06 4.3964E-06<br>3.1263E-06 1.7392E-06 7.6263E-07 1.7820E-07<br>0.0000E+00 |
| 619 | C6H6O3_12 + OH ->  | ARR 1.303E-11 0 0                                                                                                                            |
| 620 | C6H6O3_12 + OH ->  | ARR 1.823E-12 0 -395.                                                                                                                        |
| 621 | C6H6O3_12 + OH ->  | ARR 1.345E-12 0 -910.                                                                                                                        |
| 622 | C6H6O3_12 + O3 ->  | ARR 5.000E-18 0 0                                                                                                                            |
| 623 | C6H6O3_12 + NO3 -> | ARR 2.429E-15 0 0                                                                                                                            |
| 624 | C6H6O3_12 ->       | PHOTOLYSIS 1.4998E-04 1.4871E-04<br>1.4471E-04 1.3738E-04 1.2567E-04 1.0858E-04<br>8.4431E-05 5.2968E-05 2.5829E-05 6.6301E-06<br>0.0000E+00 |
| 625 | C6H6O3_12 ->       | PHOTOLYSIS 8.7717E-04 8.7094E-04<br>8.5109E-04 8.1417E-04 7.5391E-04 6.6369E-04<br>5.3173E-04 3.4985E-04 1.7813E-04 4.4607E-05<br>0.0000E+00 |
| 626 | C6H6O3_12 ->       | PHOTOLYSIS 8.7717E-04 8.7094E-04<br>8.5109E-04 8.1417E-04 7.5391E-04 6.6369E-04<br>5.3173E-04 3.4985E-04 1.7813E-04 4.4607E-05<br>0.0000E+00 |
| 627 | C6H6O3_13 + OH ->  | ARR 4.379E-12 0 14.                                                                                                                          |
| 628 | C6H6O3_13 + OH ->  | ARR 1.366E-12 0 -910.                                                                                                                        |
| 629 | C6H6O3_13 + O3 ->  | ARR 6.864E-20 0 0                                                                                                                            |
| 630 | C6H6O3_13 + NO3 -> | ARR 3.666E-15 0 0                                                                                                                            |
| 631 | C6H6O3_13 + NO3 -> | ARR 3.666E-15 0 0                                                                                                                            |
| 632 | C6H6O3_13 ->       | PHOTOLYSIS 3.5767E-06 3.4991E-06<br>3.2674E-06 2.8868E-06 2.3685E-06 1.7539E-06<br>1.0960E-06 5.0716E-07 1.8427E-07 3.4435E-08<br>0.0000E+00 |
| 633 | C6H6O3_13 ->       | PHOTOLYSIS 3.5767E-06 3.4991E-06<br>3.2674E-06 2.8868E-06 2.3685E-06 1.7539E-06<br>1.0960E-06 5.0716E-07 1.8427E-07 3.4435E-08<br>0.0000E+00 |
| 634 | C6H6O3_14 + OH ->  | ARR 4.701E-12 0 -329.                                                                                                                        |
| 635 | C6H6O3_14 + OH ->  | ARR 1.542E-12 0 -910.                                                                                                                        |
| 636 | C6H6O3_14 + O3 ->  | ARR 6.864E-20 0 0                                                                                                                            |
| 637 | C6H6O3_14 + NO3 -> | ARR 6.277E-15 0 0                                                                                                                            |
| 638 | C6H6O3_14 + NO3 -> | ARR 3.455E-15 0 0                                                                                                                            |

|     |                    |                                                                                                                                              |
|-----|--------------------|----------------------------------------------------------------------------------------------------------------------------------------------|
| 639 | C6H6O3_14 + NO3 -> | ARR 3.455E-15 0 0                                                                                                                            |
| 640 | C6H6O3_14 ->       | PHOTOLYSIS 3.5767E-06 3.4991E-06<br>3.2674E-06 2.8868E-06 2.3685E-06 1.7539E-06<br>1.0960E-06 5.0716E-07 1.8427E-07 3.4435E-08<br>0.0000E+00 |
| 641 | C6H6O3_15 ->       | ARR 5.200E+16 0 13850.                                                                                                                       |
| 642 | C6H6O3_15 + OH ->  | ARR 1.303E-11 0 0                                                                                                                            |
| 643 | C6H6O3_15 + OH ->  | ARR 4.098E-12 0 -730.                                                                                                                        |
| 644 | C6H6O3_15 + OH ->  | ARR 1.823E-12 0 -395.                                                                                                                        |
| 645 | C6H6O3_15 + O3 ->  | ARR 1.666E-18 0 0                                                                                                                            |
| 646 | C6H6O3_15 + NO3 -> | ARR 2.431E-15 0 0                                                                                                                            |
| 647 | C6H6O3_15 + NO3 -> | ARR 3.114E-16 0 0                                                                                                                            |
| 648 | C6H6O3_15 + NO3 -> | ARR 3.114E-16 0 0                                                                                                                            |
| 649 | C6H6O3_15 ->       | PHOTOLYSIS 1.1627E-06 1.1412E-06<br>1.0767E-06 9.6915E-07 8.1900E-07 6.3424E-07<br>4.2450E-07 2.1828E-07 8.9068E-08 1.9298E-08<br>0.0000E+00 |
| 650 | C6H6O3_15 ->       | PHOTOLYSIS 4.0033E-06 3.9636E-06<br>3.8397E-06 3.6166E-06 3.2684E-06 2.7748E-06<br>2.1033E-06 1.2727E-06 6.0161E-07 1.5165E-07<br>0.0000E+00 |
| 651 | C6H6O3_15 ->       | PHOTOLYSIS 3.8855E-06 3.8471E-06<br>3.7268E-06 3.5103E-06 3.1723E-06 2.6932E-06<br>2.0414E-06 1.2353E-06 5.8391E-07 1.4719E-07<br>0.0000E+00 |
| 652 | C6H6O3_15 ->       | PHOTOLYSIS 3.8855E-06 3.8471E-06<br>3.7268E-06 3.5103E-06 3.1723E-06 2.6932E-06<br>2.0414E-06 1.2353E-06 5.8391E-07 1.4719E-07<br>0.0000E+00 |
| 653 | C6H6O3_16 + OH ->  | ARR 1.400E-11 0 0                                                                                                                            |
| 654 | C6H6O3_16 + OH ->  | ARR 4.187E-12 0 -920.                                                                                                                        |
| 655 | C6H6O3_16 + O3 ->  | ARR 1.666E-18 0 0                                                                                                                            |
| 656 | C6H6O3_16 + NO3 -> | ARR 2.431E-15 0 0                                                                                                                            |
| 657 | C6H6O3_16 + NO3 -> | ARR 3.114E-16 0 0                                                                                                                            |
| 658 | C6H6O3_16 + NO3 -> | ARR 3.114E-16 0 0                                                                                                                            |
| 659 | C6H6O3_16 ->       | PHOTOLYSIS 4.0033E-06 3.9636E-06<br>3.8397E-06 3.6166E-06 3.2684E-06 2.7748E-06<br>2.1033E-06 1.2727E-06 6.0161E-07 1.5165E-07<br>0.0000E+00 |
| 660 | C6H6O3_16 ->       | PHOTOLYSIS 3.8855E-06 3.8471E-06<br>3.7268E-06 3.5103E-06 3.1723E-06 2.6932E-06<br>2.0414E-06 1.2353E-06 5.8391E-07 1.4719E-07<br>0.0000E+00 |
| 661 | C6H6O3_16 ->       | PHOTOLYSIS 3.8855E-06 3.8471E-06<br>3.7268E-06 3.5103E-06 3.1723E-06 2.6932E-06<br>2.0414E-06 1.2353E-06 5.8391E-07 1.4719E-07<br>0.0000E+00 |
| 662 | C6H6O3_18 ->       | ARR 5.200E+16 0 13850.                                                                                                                       |
| 663 | C6H6O3_18 + OH ->  | ARR 1.183E-11 0 -25.                                                                                                                         |
| 664 | C6H6O3_18 + NO3 -> | ARR 4.922E-15 0 0                                                                                                                            |
| 665 | C6H6O3_18 ->       | PHOTOLYSIS 1.1627E-06 1.1412E-06<br>1.0767E-06 9.6915E-07 8.1900E-07 6.3424E-07<br>4.2450E-07 2.1828E-07 8.9068E-08 1.9298E-08<br>0.0000E+00 |
| 666 | C6H6O3_18 ->       | PHOTOLYSIS 1.3993E-05 1.3687E-05<br>1.2773E-05 1.1268E-05 9.2156E-06 6.7805E-06<br>4.1825E-06 1.8855E-06 6.5962E-07 1.1592E-07<br>0.0000E+00 |
| 667 | C6H6O3_19 + OH ->  | ARR 1.202E-11 0 -25.                                                                                                                         |
| 668 | C6H6O3_19 + OH ->  | ARR 5.218E-12 0 -420.                                                                                                                        |
| 669 | C6H6O3_19 + NO3 -> | ARR 2.318E-14 0 0                                                                                                                            |

|     |                    |                                                                                                                                              |
|-----|--------------------|----------------------------------------------------------------------------------------------------------------------------------------------|
| 670 | C6H6O3_19 + NO3 -> | ARR 1.165E-14 0 0                                                                                                                            |
| 671 | C6H6O3_19 ->       | PHOTOLYSIS 1.3993E-05 1.3687E-05<br>1.2773E-05 1.1268E-05 9.2156E-06 6.7805E-06<br>4.1825E-06 1.8855E-06 6.5962E-07 1.1592E-07<br>0.0000E+00 |
| 672 | C6H6O3_19 ->       | PHOTOLYSIS 6.3200E-06 6.1814E-06<br>5.7672E-06 5.0855E-06 4.1552E-06 3.0520E-06<br>1.8766E-06 8.4112E-07 2.9197E-07 5.0853E-08<br>0.0000E+00 |
| 673 | C6H6O3_19 ->       | PHOTOLYSIS 2.5975E-05 2.5431E-05<br>2.3802E-05 2.1107E-05 1.7397E-05 1.2944E-05<br>8.1150E-06 3.7471E-06 1.3458E-06 2.4407E-07<br>0.0000E+00 |
| 674 | C6H6O3_21 + OH ->  | ARR 1.302E-11 0 78.                                                                                                                          |
| 675 | C6H6O3_21 + OH ->  | ARR 1.980E-12 0 -590.                                                                                                                        |
| 676 | C6H6O3_21 + NO3 -> | ARR 1.087E-14 0 0                                                                                                                            |
| 677 | C6H6O3_21 + NO3 -> | ARR 7.437E-15 0 0                                                                                                                            |
| 678 | C6H6O3_21 + NO3 -> | ARR 6.817E-15 0 0                                                                                                                            |
| 679 | C6H6O3_21 ->       | PHOTOLYSIS 2.5975E-05 2.5431E-05<br>2.3802E-05 2.1107E-05 1.7397E-05 1.2944E-05<br>8.1150E-06 3.7471E-06 1.3458E-06 2.4407E-07<br>0.0000E+00 |
| 680 | C6H6O3_21 ->       | PHOTOLYSIS 1.0382E-04 1.0277E-04<br>9.9520E-05 9.3759E-05 8.4963E-05 7.2773E-05<br>5.6464E-05 3.6026E-05 1.8062E-05 4.3355E-06<br>0.0000E+00 |
| 681 | C6H6O3_21 ->       | PHOTOLYSIS 5.7680E-06 5.7096E-06<br>5.5289E-06 5.2088E-06 4.7202E-06 4.0430E-06<br>3.1369E-06 2.0014E-06 1.0035E-06 2.4086E-07<br>0.0000E+00 |
| 682 | C6H6O3_22 + OH ->  | ARR 1.176E-11 0 -25.                                                                                                                         |
| 683 | C6H6O3_22 + OH ->  | ARR 1.790E-12 0 -590.                                                                                                                        |
| 684 | C6H6O3_22 + NO3 -> | ARR 1.506E-14 0 0                                                                                                                            |
| 685 | C6H6O3_22 + NO3 -> | ARR 4.747E-15 0 0                                                                                                                            |
| 686 | C6H6O3_22 ->       | PHOTOLYSIS 1.3993E-05 1.3687E-05<br>1.2773E-05 1.1268E-05 9.2156E-06 6.7805E-06<br>4.1825E-06 1.8855E-06 6.5962E-07 1.1592E-07<br>0.0000E+00 |
| 687 | C6H6O3_22 ->       | PHOTOLYSIS 1.0382E-04 1.0277E-04<br>9.9520E-05 9.3759E-05 8.4963E-05 7.2773E-05<br>5.6464E-05 3.6026E-05 1.8062E-05 4.3355E-06<br>0.0000E+00 |
| 688 | C6H6O3_22 ->       | PHOTOLYSIS 5.7680E-06 5.7096E-06<br>5.5289E-06 5.2088E-06 4.7202E-06 4.0430E-06<br>3.1369E-06 2.0014E-06 1.0035E-06 2.4086E-07<br>0.0000E+00 |
| 689 | C6H6O3_23 + OH ->  | ARR 6.913E-12 0 -730.                                                                                                                        |
| 690 | C6H6O3_23 + O3 ->  | ARR 1.666E-18 0 0                                                                                                                            |
| 691 | C6H6O3_23 + NO3 -> | ARR 5.330E-15 0 0                                                                                                                            |
| 692 | C6H6O3_23 + NO3 -> | ARR 2.626E-15 0 0                                                                                                                            |
| 693 | C6H6O3_23 ->       | PHOTOLYSIS 1.3993E-05 1.3687E-05<br>1.2773E-05 1.1268E-05 9.2156E-06 6.7805E-06<br>4.1825E-06 1.8855E-06 6.5962E-07 1.1592E-07<br>0.0000E+00 |
| 694 | C6H6O3_23 ->       | PHOTOLYSIS 4.0033E-06 3.9636E-06<br>3.8397E-06 3.6166E-06 3.2684E-06 2.7748E-06<br>2.1033E-06 1.2727E-06 6.0161E-07 1.5165E-07<br>0.0000E+00 |
| 695 | C6H6O3_23 ->       | PHOTOLYSIS 3.8855E-06 3.8471E-06<br>3.7268E-06 3.5103E-06 3.1723E-06 2.6932E-06<br>2.0414E-06 1.2353E-06 5.8391E-07 1.4719E-07<br>0.0000E+00 |
| 696 | C6H6O3_23 ->       | PHOTOLYSIS 3.8855E-06 3.8471E-06<br>3.7268E-06 3.5103E-06 3.1723E-06 2.6932E-06<br>2.0414E-06 1.2353E-06 5.8391E-07 1.4719E-07<br>0.0000E+00 |

|     |                    |                                                                                                                                              |
|-----|--------------------|----------------------------------------------------------------------------------------------------------------------------------------------|
| 697 | C6H6O3_24 + OH ->  | ARR 1.293E-11 0 -25.                                                                                                                         |
| 698 | C6H6O3_24 + OH ->  | ARR 1.483E-12 0 -910.                                                                                                                        |
| 699 | C6H6O3_24 + O3 ->  | ARR 6.188E-18 0 0                                                                                                                            |
| 700 | C6H6O3_24 + NO3 -> | ARR 5.186E-15 0 0                                                                                                                            |
| 701 | C6H6O3_24 ->       | PHOTOLYSIS 1.3993E-05 1.3687E-05<br>1.2773E-05 1.1268E-05 9.2156E-06 6.7805E-06<br>4.1825E-06 1.8855E-06 6.5962E-07 1.1592E-07<br>0.0000E+00 |
| 702 | C6H6O3_24 ->       | PHOTOLYSIS 6.4760E-07 6.4117E-07<br>6.2110E-07 5.8499E-07 5.2867E-07 4.4890E-07<br>3.4047E-07 2.0636E-07 9.7703E-08 2.4532E-08<br>0.0000E+00 |
| 703 | C6H6O3_24 ->       | PHOTOLYSIS 6.4760E-06 6.4117E-06<br>6.2110E-06 5.8499E-06 5.2867E-06 4.4890E-06<br>3.4047E-06 2.0636E-06 9.7703E-07 2.4532E-07<br>0.0000E+00 |
| 704 | C6H6O3_25 + OH ->  | ARR 6.082E-12 0 -730.                                                                                                                        |
| 705 | C6H6O3_25 + O3 ->  | ARR 1.666E-18 0 0                                                                                                                            |
| 706 | C6H6O3_25 + NO3 -> | ARR 3.054E-15 0 0                                                                                                                            |
| 707 | C6H6O3_25 ->       | PHOTOLYSIS 7.1608E-06 7.0590E-06<br>6.7481E-06 6.2123E-06 5.4266E-06 4.3964E-06<br>3.1263E-06 1.7392E-06 7.6263E-07 1.7820E-07<br>0.0000E+00 |
| 708 | C6H6O3_25 ->       | PHOTOLYSIS 4.0033E-06 3.9636E-06<br>3.8397E-06 3.6166E-06 3.2684E-06 2.7748E-06<br>2.1033E-06 1.2727E-06 6.0161E-07 1.5165E-07<br>0.0000E+00 |
| 709 | C6H6O3_25 ->       | PHOTOLYSIS 3.8855E-06 3.8471E-06<br>3.7268E-06 3.5103E-06 3.1723E-06 2.6932E-06<br>2.0414E-06 1.2353E-06 5.8391E-07 1.4719E-07<br>0.0000E+00 |
| 710 | C6H6O3_25 ->       | PHOTOLYSIS 3.8855E-06 3.8471E-06<br>3.7268E-06 3.5103E-06 3.1723E-06 2.6932E-06<br>2.0414E-06 1.2353E-06 5.8391E-07 1.4719E-07<br>0.0000E+00 |
| 711 | C6H6O3_26 + OH ->  | ARR 5.576E-12 0 -730.                                                                                                                        |
| 712 | C6H6O3_26 + O3 ->  | ARR 1.304E-15 0 1690.                                                                                                                        |
| 713 | C6H6O3_26 + NO3 -> | ARR 1.358E-14 0 0                                                                                                                            |
| 714 | C6H6O3_26 ->       | PHOTOLYSIS 1.0382E-04 1.0277E-04<br>9.9520E-05 9.3759E-05 8.4963E-05 7.2773E-05<br>5.6464E-05 3.6026E-05 1.8062E-05 4.3355E-06<br>0.0000E+00 |
| 715 | C6H6O3_26 ->       | PHOTOLYSIS 5.7680E-06 5.7096E-06<br>5.5289E-06 5.2088E-06 4.7202E-06 4.0430E-06<br>3.1369E-06 2.0014E-06 1.0035E-06 2.4086E-07<br>0.0000E+00 |
| 716 | C6H6O3_27 + OH ->  | ARR 1.468E-11 0 -25.                                                                                                                         |
| 717 | C6H6O3_27 + NO3 -> | ARR 4.922E-15 0 0                                                                                                                            |
| 718 | C6H6O3_27 ->       | PHOTOLYSIS 7.1608E-06 7.0590E-06<br>6.7481E-06 6.2123E-06 5.4266E-06 4.3964E-06<br>3.1263E-06 1.7392E-06 7.6263E-07 1.7820E-07<br>0.0000E+00 |
| 719 | C6H6O3_27 ->       | PHOTOLYSIS 1.3993E-05 1.3687E-05<br>1.2773E-05 1.1268E-05 9.2156E-06 6.7805E-06<br>4.1825E-06 1.8855E-06 6.5962E-07 1.1592E-07<br>0.0000E+00 |
| 720 | C6H6O3_28 + OH ->  | ARR 7.722E-12 0 -490.                                                                                                                        |
| 721 | C6H6O3_28 + NO3 -> | ARR 3.622E-12 0 0                                                                                                                            |
| 722 | C6H6O3_28 ->       | PHOTOLYSIS 1.3993E-05 1.3687E-05<br>1.2773E-05 1.1268E-05 9.2156E-06 6.7805E-06<br>4.1825E-06 1.8855E-06 6.5962E-07 1.1592E-07<br>0.0000E+00 |
| 723 | C6H6O3_28 ->       | PHOTOLYSIS 6.3200E-06 6.1814E-06<br>5.7672E-06 5.0855E-06 4.1552E-06 3.0520E-06<br>1.8766E-06 8.4112E-07 2.9197E-07 5.0853E-08<br>0.0000E+00 |

|     |                    |                                                                                                                                              |
|-----|--------------------|----------------------------------------------------------------------------------------------------------------------------------------------|
| 724 | C6H6O3_28 ->       | PHOTOLYSIS 6.8267E-05 6.7157E-05<br>6.3779E-05 5.8001E-05 4.9642E-05 3.8921E-05<br>2.6222E-05 1.3337E-05 5.2691E-06 1.0571E-06<br>0.0000E+00 |
| 725 | C6H6O3_29 + OH ->  | ARR 1.202E-11 0 -25.                                                                                                                         |
| 726 | C6H6O3_29 + OH ->  | ARR 5.218E-12 0 -420.                                                                                                                        |
| 727 | C6H6O3_29 + NO3 -> | ARR 4.124E-14 0 0                                                                                                                            |
| 728 | C6H6O3_29 ->       | PHOTOLYSIS 1.3993E-05 1.3687E-05<br>1.2773E-05 1.1268E-05 9.2156E-06 6.7805E-06<br>4.1825E-06 1.8855E-06 6.5962E-07 1.1592E-07<br>0.0000E+00 |
| 729 | C6H6O3_29 ->       | PHOTOLYSIS 3.1034E-04 3.0825E-04<br>3.0160E-04 2.8920E-04 2.6889E-04 2.3831E-04<br>1.9313E-04 1.2954E-04 6.7220E-05 1.6652E-05<br>0.0000E+00 |
| 730 | C6H6O3_29 ->       | PHOTOLYSIS 2.5975E-05 2.5431E-05<br>2.3802E-05 2.1107E-05 1.7397E-05 1.2944E-05<br>8.1150E-06 3.7471E-06 1.3458E-06 2.4407E-07<br>0.0000E+00 |
| 731 | C6H6O3_30 + OH ->  | ARR 7.760E-12 0 -730.                                                                                                                        |
| 732 | C6H6O3_30 + O3 ->  | ARR 1.932E-18 0 0                                                                                                                            |
| 733 | C6H6O3_30 + NO3 -> | ARR 4.283E-15 0 0                                                                                                                            |
| 734 | C6H6O3_30 ->       | PHOTOLYSIS 7.1608E-06 7.0590E-06<br>6.7481E-06 6.2123E-06 5.4266E-06 4.3964E-06<br>3.1263E-06 1.7392E-06 7.6263E-07 1.7820E-07<br>0.0000E+00 |
| 735 | C6H6O3_30 ->       | PHOTOLYSIS 4.8066E-06 4.7122E-06<br>4.4297E-06 3.9632E-06 3.3204E-06 2.5430E-06<br>1.6791E-06 8.5031E-07 3.4350E-07 7.4208E-08<br>0.0000E+00 |
| 736 | C6H6O3_30 ->       | PHOTOLYSIS 4.0033E-06 3.9636E-06<br>3.8397E-06 3.6166E-06 3.2684E-06 2.7748E-06<br>2.1033E-06 1.2727E-06 6.0161E-07 1.5165E-07<br>0.0000E+00 |
| 737 | C6H6O3_30 ->       | PHOTOLYSIS 3.8855E-06 3.8471E-06<br>3.7268E-06 3.5103E-06 3.1723E-06 2.6932E-06<br>2.0414E-06 1.2353E-06 5.8391E-07 1.4719E-07<br>0.0000E+00 |
| 738 | C6H6O3_30 ->       | PHOTOLYSIS 3.8855E-06 3.8471E-06<br>3.7268E-06 3.5103E-06 3.1723E-06 2.6932E-06<br>2.0414E-06 1.2353E-06 5.8391E-07 1.4719E-07<br>0.0000E+00 |
| 739 | C6H6O3_31 + OH ->  | ARR 7.754E-12 0 -490.                                                                                                                        |
| 740 | C6H6O3_31 + NO3 -> | ARR 3.638E-12 0 0                                                                                                                            |
| 741 | C6H6O3_31 ->       | PHOTOLYSIS 1.0382E-04 1.0277E-04<br>9.9520E-05 9.3759E-05 8.4963E-05 7.2773E-05<br>5.6464E-05 3.6026E-05 1.8062E-05 4.3355E-06<br>0.0000E+00 |
| 742 | C6H6O3_31 ->       | PHOTOLYSIS 5.7680E-06 5.7096E-06<br>5.5289E-06 5.2088E-06 4.7202E-06 4.0430E-06<br>3.1369E-06 2.0014E-06 1.0035E-06 2.4086E-07<br>0.0000E+00 |
| 743 | C6H6O3_31 ->       | PHOTOLYSIS 6.8267E-05 6.7157E-05<br>6.3779E-05 5.8001E-05 4.9642E-05 3.8921E-05<br>2.6222E-05 1.3337E-05 5.2691E-06 1.0571E-06<br>0.0000E+00 |
| 744 | C6H6O3_32 + OH ->  | ARR 8.451E-12 0 -420.                                                                                                                        |
| 745 | C6H6O3_32 + NO3 -> | ARR 2.352E-14 0 0                                                                                                                            |
| 746 | C6H6O3_32 ->       | PHOTOLYSIS 2.5975E-05 2.5431E-05<br>2.3802E-05 2.1107E-05 1.7397E-05 1.2944E-05<br>8.1150E-06 3.7471E-06 1.3458E-06 2.4407E-07<br>0.0000E+00 |
| 747 | C6H6O3_32 ->       | PHOTOLYSIS 4.8066E-06 4.7122E-06<br>4.4297E-06 3.9632E-06 3.3204E-06 2.5430E-06<br>1.6791E-06 8.5031E-07 3.4350E-07 7.4208E-08<br>0.0000E+00 |
| 748 | C6H6O3_32 ->       | PHOTOLYSIS 1.0382E-04 1.0277E-04<br>9.9520E-05 9.3759E-05 8.4963E-05 7.2773E-05                                                              |

|     |                    |                                                                                                                                              |
|-----|--------------------|----------------------------------------------------------------------------------------------------------------------------------------------|
|     |                    | 5.6464E-05 3.6026E-05 1.8062E-05 4.3355E-06<br>0.0000E+00                                                                                    |
| 749 | C6H6O3_32 ->       | PHOTOLYSIS 5.7680E-06 5.7096E-06<br>5.5289E-06 5.2088E-06 4.7202E-06 4.0430E-06<br>3.1369E-06 2.0014E-06 1.0035E-06 2.4086E-07<br>0.0000E+00 |
| 750 | C6H6O3_33 + OH ->  | ARR 8.096E-14 0 -2150.                                                                                                                       |
| 751 | C6H6O3_33 + O3 ->  | ARR 5.950E-18 0 0                                                                                                                            |
| 752 | C6H6O3_33 + NO3 -> | ARR 6.305E-15 0 0                                                                                                                            |
| 753 | C6H6O3_33 ->       | PHOTOLYSIS 7.1608E-06 7.0590E-06<br>6.7481E-06 6.2123E-06 5.4266E-06 4.3964E-06<br>3.1263E-06 1.7392E-06 7.6263E-07 1.7820E-07<br>0.0000E+00 |
| 754 | C6H6O3_33 ->       | PHOTOLYSIS 8.7717E-04 8.7094E-04<br>8.5109E-04 8.1417E-04 7.5391E-04 6.6369E-04<br>5.3173E-04 3.4985E-04 1.7813E-04 4.4607E-05<br>0.0000E+00 |
| 755 | C6H6O3_33 ->       | PHOTOLYSIS 8.7717E-04 8.7094E-04<br>8.5109E-04 8.1417E-04 7.5391E-04 6.6369E-04<br>5.3173E-04 3.4985E-04 1.7813E-04 4.4607E-05<br>0.0000E+00 |
| 756 | C6H6O3_34 + OH ->  | ARR 1.444E-12 0 -1500.                                                                                                                       |
| 757 | C6H6O3_34 + O3 ->  | ARR 4.641E-17 0 0                                                                                                                            |
| 758 | C6H6O3_34 + NO3 -> | ARR 5.766E-15 0 0                                                                                                                            |
| 759 | C6H6O3_34 + NO3 -> | ARR 3.559E-15 0 0                                                                                                                            |
| 760 | C6H6O3_34 + NO3 -> | ARR 3.559E-15 0 0                                                                                                                            |
| 761 | C6H6O3_34 ->       | PHOTOLYSIS 7.1608E-06 7.0590E-06<br>6.7481E-06 6.2123E-06 5.4266E-06 4.3964E-06<br>3.1263E-06 1.7392E-06 7.6263E-07 1.7820E-07<br>0.0000E+00 |
| 762 | C6H6O3_34 ->       | PHOTOLYSIS 6.4760E-07 6.4117E-07<br>6.2110E-07 5.8499E-07 5.2867E-07 4.4890E-07<br>3.4047E-07 2.0636E-07 9.7703E-08 2.4532E-08<br>0.0000E+00 |
| 763 | C6H6O3_34 ->       | PHOTOLYSIS 6.4760E-06 6.4117E-06<br>6.2110E-06 5.8499E-06 5.2867E-06 4.4890E-06<br>3.4047E-06 2.0636E-06 9.7703E-07 2.4532E-07<br>0.0000E+00 |
| 764 | C6H6O3_34 ->       | PHOTOLYSIS 1.3993E-05 1.3687E-05<br>1.2773E-05 1.1268E-05 9.2156E-06 6.7805E-06<br>4.1825E-06 1.8855E-06 6.5962E-07 1.1592E-07<br>0.0000E+00 |
| 765 | C6H6O3_35 + OH ->  | ARR 2.682E-14 0 -1763.                                                                                                                       |
| 766 | C6H6O3_35 + OH ->  | ARR 1.347E-12 0 -910.                                                                                                                        |
| 767 | C6H6O3_35 + OH ->  | ARR 1.347E-12 0 -910.                                                                                                                        |
| 768 | C6H6O3_35 + O3 ->  | ARR 3.120E-20 0 0                                                                                                                            |
| 769 | C6H6O3_35 + NO3 -> | ARR 2.631E-15 0 0                                                                                                                            |
| 770 | C6H6O3_36 + OH ->  | ARR 1.362E-12 0 -910.                                                                                                                        |
| 771 | C6H6O3_36 + OH ->  | ARR 1.432E-12 0 -568.                                                                                                                        |
| 772 | C6H6O3_36 + O3 ->  | ARR 3.120E-20 0 0                                                                                                                            |
| 773 | C6H6O3_36 + NO3 -> | ARR 1.464E-16 0 0                                                                                                                            |
| 774 | C6H6O3_36 + NO3 -> | ARR 7.299E-17 0 0                                                                                                                            |
| 775 | C6H6O3_36 + NO3 -> | ARR 7.299E-17 0 0                                                                                                                            |
| 776 | C6H6O3_36 ->       | PHOTOLYSIS 5.2032E-05 5.1093E-05<br>4.8258E-05 4.3488E-05 3.6749E-05 2.8358E-05<br>1.8760E-05 9.3794E-06 3.6776E-06 7.4565E-07<br>0.0000E+00 |
| 777 | C6H6O3_37 + OH ->  | ARR 6.927E-12 0 -730.                                                                                                                        |
| 778 | C6H6O3_37 + O3 ->  | ARR 1.932E-18 0 0                                                                                                                            |
| 779 | C6H6O3_37 + NO3 -> | ARR 1.795E-15 0 0                                                                                                                            |
| 780 | C6H6O3_37 + NO3 -> | ARR 2.805E-15 0 0                                                                                                                            |

|     |                    |                                                                                                                                              |
|-----|--------------------|----------------------------------------------------------------------------------------------------------------------------------------------|
| 781 | C6H6O3_37 ->       | PHOTOLYSIS 1.0382E-04 1.0277E-04<br>9.9520E-05 9.3759E-05 8.4963E-05 7.2773E-05<br>5.6464E-05 3.6026E-05 1.8062E-05 4.3355E-06<br>0.0000E+00 |
| 782 | C6H6O3_37 ->       | PHOTOLYSIS 5.7680E-06 5.7096E-06<br>5.5289E-06 5.2088E-06 4.7202E-06 4.0430E-06<br>3.1369E-06 2.0014E-06 1.0035E-06 2.4086E-07<br>0.0000E+00 |
| 783 | C6H6O3_37 ->       | PHOTOLYSIS 4.0033E-06 3.9636E-06<br>3.8397E-06 3.6166E-06 3.2684E-06 2.7748E-06<br>2.1033E-06 1.2727E-06 6.0161E-07 1.5165E-07<br>0.0000E+00 |
| 784 | C6H6O3_37 ->       | PHOTOLYSIS 3.8855E-06 3.8471E-06<br>3.7268E-06 3.5103E-06 3.1723E-06 2.6932E-06<br>2.0414E-06 1.2353E-06 5.8391E-07 1.4719E-07<br>0.0000E+00 |
| 785 | C6H6O3_37 ->       | PHOTOLYSIS 3.8855E-06 3.8471E-06<br>3.7268E-06 3.5103E-06 3.1723E-06 2.6932E-06<br>2.0414E-06 1.2353E-06 5.8391E-07 1.4719E-07<br>0.0000E+00 |
| 786 | C6H6O3_38 + OH ->  | ARR 1.568E-12 0 -1500.                                                                                                                       |
| 787 | C6H6O3_38 + O3 ->  | ARR 9.408E-17 0 0                                                                                                                            |
| 788 | C6H6O3_38 + NO3 -> | ARR 1.394E-13 0 0                                                                                                                            |
| 789 | C6H6O3_38 + NO3 -> | ARR 1.394E-13 0 0                                                                                                                            |
| 790 | C6H6O3_38 ->       | PHOTOLYSIS 7.1608E-06 7.0590E-06<br>6.7481E-06 6.2123E-06 5.4266E-06 4.3964E-06<br>3.1263E-06 1.7392E-06 7.6263E-07 1.7820E-07<br>0.0000E+00 |
| 791 | C6H6O3_38 ->       | PHOTOLYSIS 1.0382E-04 1.0277E-04<br>9.9520E-05 9.3759E-05 8.4963E-05 7.2773E-05<br>5.6464E-05 3.6026E-05 1.8062E-05 4.3355E-06<br>0.0000E+00 |
| 792 | C6H6O3_38 ->       | PHOTOLYSIS 5.7680E-06 5.7096E-06<br>5.5289E-06 5.2088E-06 4.7202E-06 4.0430E-06<br>3.1369E-06 2.0014E-06 1.0035E-06 2.4086E-07<br>0.0000E+00 |
| 793 | C6H6O3_39 + OH ->  | ARR 1.233E-11 0 -25.                                                                                                                         |
| 794 | C6H6O3_39 + NO3 -> | ARR 4.922E-15 0 0                                                                                                                            |
| 795 | C6H6O3_39 ->       | PHOTOLYSIS 1.3993E-05 1.3687E-05<br>1.2773E-05 1.1268E-05 9.2156E-06 6.7805E-06<br>4.1825E-06 1.8855E-06 6.5962E-07 1.1592E-07<br>0.0000E+00 |
| 796 | C6H6O3_40 + OH ->  | ARR 2.618E-13 0 -1693.                                                                                                                       |
| 797 | C6H6O3_40 + OH ->  | ARR 5.430E-12 0 -920.                                                                                                                        |
| 798 | C6H6O3_40 + O3 ->  | ARR 2.184E-18 0 0                                                                                                                            |
| 799 | C6H6O3_40 + NO3 -> | ARR 1.533E-14 0 0                                                                                                                            |
| 800 | C6H6O3_41 + OH ->  | ARR 4.693E-12 0 -578.                                                                                                                        |
| 801 | C6H6O3_41 + OH ->  | ARR 1.539E-12 0 -910.                                                                                                                        |
| 802 | C6H6O3_41 + O3 ->  | ARR 2.184E-18 0 0                                                                                                                            |
| 803 | C6H6O3_41 + NO3 -> | ARR 3.171E-15 0 0                                                                                                                            |
| 804 | C6H6O3_41 + NO3 -> | ARR 3.153E-15 0 0                                                                                                                            |
| 805 | C6H6O3_41 + NO3 -> | ARR 3.153E-15 0 0                                                                                                                            |
| 806 | C6H6O3_41 ->       | PHOTOLYSIS 3.5767E-06 3.4991E-06<br>3.2674E-06 2.8868E-06 2.3685E-06 1.7539E-06<br>1.0960E-06 5.0716E-07 1.8427E-07 3.4435E-08<br>0.0000E+00 |
| 807 | C6H6O3_42 + OH ->  | ARR 5.825E-12 0 -730.                                                                                                                        |
| 808 | C6H6O3_42 + O3 ->  | ARR 1.932E-18 0 0                                                                                                                            |
| 809 | C6H6O3_42 + NO3 -> | ARR 3.054E-15 0 0                                                                                                                            |
| 810 | C6H6O3_42 ->       | PHOTOLYSIS 1.4998E-04 1.4871E-04<br>1.4471E-04 1.3738E-04 1.2567E-04 1.0858E-04<br>8.4431E-05 5.2968E-05 2.5829E-05 6.6301E-06<br>0.0000E+00 |

|     |                             |                                                                                                                                              |
|-----|-----------------------------|----------------------------------------------------------------------------------------------------------------------------------------------|
| 811 | C6H6O3_42 ->                | PHOTOLYSIS 4.0033E-06 3.9636E-06<br>3.8397E-06 3.6166E-06 3.2684E-06 2.7748E-06<br>2.1033E-06 1.2727E-06 6.0161E-07 1.5165E-07<br>0.0000E+00 |
| 812 | C6H6O3_42 ->                | PHOTOLYSIS 3.8855E-06 3.8471E-06<br>3.7268E-06 3.5103E-06 3.1723E-06 2.6932E-06<br>2.0414E-06 1.2353E-06 5.8391E-07 1.4719E-07<br>0.0000E+00 |
| 813 | C6H6O3_42 ->                | PHOTOLYSIS 3.8855E-06 3.8471E-06<br>3.7268E-06 3.5103E-06 3.1723E-06 2.6932E-06<br>2.0414E-06 1.2353E-06 5.8391E-07 1.4719E-07<br>0.0000E+00 |
| 814 | C6H6O3_43 + OH ->           | ARR 2.310E-12 0 -910.                                                                                                                        |
| 815 | C6H6O3_43 + O3 ->           | ARR 5.950E-18 0 0                                                                                                                            |
| 816 | C6H6O3_43 + NO3 ->          | ARR 2.449E-15 0 0                                                                                                                            |
| 817 | C6H6O3_43 ->                | PHOTOLYSIS 8.7717E-04 8.7094E-04<br>8.5109E-04 8.1417E-04 7.5391E-04 6.6369E-04<br>5.3173E-04 3.4985E-04 1.7813E-04 4.4607E-05<br>0.0000E+00 |
| 818 | C6H6O3_43 ->                | PHOTOLYSIS 8.7717E-04 8.7094E-04<br>8.5109E-04 8.1417E-04 7.5391E-04 6.6369E-04<br>5.3173E-04 3.4985E-04 1.7813E-04 4.4607E-05<br>0.0000E+00 |
| 819 | C6H6O3_44 + OH ->           | ARR 2.559E-12 0 -910.                                                                                                                        |
| 820 | C6H6O3_44 + O3 ->           | ARR 2.737E-18 0 0                                                                                                                            |
| 821 | C6H6O3_44 + NO3 ->          | ARR 4.911E-15 0 0                                                                                                                            |
| 822 | C6H6O3_44 + NO3 ->          | ARR 3.406E-15 0 0                                                                                                                            |
| 823 | C6H6O3_44 + NO3 ->          | ARR 3.406E-15 0 0                                                                                                                            |
| 824 | C6H6O3_44 ->                | PHOTOLYSIS 6.4760E-07 6.4117E-07<br>6.2110E-07 5.8499E-07 5.2867E-07 4.4890E-07<br>3.4047E-07 2.0636E-07 9.7703E-08 2.4532E-08<br>0.0000E+00 |
| 825 | C6H6O3_44 ->                | PHOTOLYSIS 6.4760E-06 6.4117E-06<br>6.2110E-06 5.8499E-06 5.2867E-06 4.4890E-06<br>3.4047E-06 2.0636E-06 9.7703E-07 2.4532E-07<br>0.0000E+00 |
| 826 | C6H6O3_44 ->                | PHOTOLYSIS 1.3993E-05 1.3687E-05<br>1.2773E-05 1.1268E-05 9.2156E-06 6.7805E-06<br>4.1825E-06 1.8855E-06 6.5962E-07 1.1592E-07<br>0.0000E+00 |
| 827 | C6H6O3_45 + OH ->           | ARR 6.331E-12 0 -730.                                                                                                                        |
| 828 | C6H6O3_45 + O3 ->           | ARR 3.174E-18 0 0                                                                                                                            |
| 829 | C6H6O3_45 + NO3 ->          | ARR 1.555E-13 0 0                                                                                                                            |
| 830 | C6H6O3_45 + NO3 ->          | ARR 1.555E-13 0 0                                                                                                                            |
| 831 | C6H6O3_45 ->                | PHOTOLYSIS 1.0382E-04 1.0277E-04<br>9.9520E-05 9.3759E-05 8.4963E-05 7.2773E-05<br>5.6464E-05 3.6026E-05 1.8062E-05 4.3355E-06<br>0.0000E+00 |
| 832 | C6H6O3_45 ->                | PHOTOLYSIS 5.7680E-06 5.7096E-06<br>5.5289E-06 5.2088E-06 4.7202E-06 4.0430E-06<br>3.1369E-06 2.0014E-06 1.0035E-06 2.4086E-07<br>0.0000E+00 |
| 833 | BZBIPERO2 -> BZo_RO2_O7     | ARR 0.32 0 0                                                                                                                                 |
| 834 | BZBIPERO -> BZeo_RO2_O6     | ARR 0.1E-6 0 0                                                                                                                               |
| 835 | BZBIPERO2 -> C5_RO2_O6 + CO | ARR 0.022 0 0                                                                                                                                |
| 836 | BZEMUCO2 -> BZeo_RO2_O8     | ARR 0.07 0 0                                                                                                                                 |
| 837 | BZEMUCO2 -> C5_RO2_O7 + CO  | ARR 0.25 0 0                                                                                                                                 |
| 838 | PHENO2 -> BZeo_RO2_O8       | ARR 0.07 0 0                                                                                                                                 |
| 839 | PHENO2 -> C5_RO2_O7 + CO    | ARR 0.25 0 0                                                                                                                                 |
| 840 | BZo_RO2_O7 -> BZo_RO2_O9    | ARR 1.5 0 0                                                                                                                                  |
| 841 | BZo_RO2_O9 -> BZo_RO2_O11   | ARR 0.45 0 0                                                                                                                                 |

|     |                                            |                       |
|-----|--------------------------------------------|-----------------------|
| 842 | BZeo_RO2_O6 -> BZeo_RO2_O8                 | ARR 0.1 0 0           |
| 843 | BZeo_RO2_O8 -> BZeo_RO2_O10                | ARR 0.01 0 0          |
| 844 | BZo2_RO_O6 -> BZeo_RO2_O8                  | ARR 0.90E-6 0 0       |
| 845 | BZo2_RO_O8 -> BZeo_RO2_O10                 | ARR 0.85E-6 0 0       |
| 846 | BZeo2_RO_O5 -> BZo_RO2_O7                  | ARR 0.90E-6 0 0       |
| 847 | BZeo2_RO_O7 -> BZo_RO2_O9                  | ARR 0.90E-6 0 0       |
| 848 | BZeo2_RO_O9 -> BZo_RO2_O11                 | ARR 0.40E-6 0 0       |
| 849 | BZo_RO_O6 -> BZeo_RO2_O8                   | ARR 0.2E-6 0 0        |
| 850 | BZo_RO_O8 -> BZeo_RO2_O10                  | ARR 0.1E-6 0 0        |
| 851 | BZeo_RO_O5 -> BZo_RO2_O7                   | ARR 0.45E-6 0 0       |
| 852 | BZeo_RO_O7 -> BZo_RO2_O9                   | ARR 0.35E-6 0 0       |
| 853 | BZeo_RO_O9 -> BZo_RO2_O11                  | ARR 0.45E-6 0 0       |
| 854 | C5_RO_O5 -> C5_RO2_O7                      | ARR 0.90E-6 0 0       |
| 855 | C5_RO_O6 -> C5_RO2_O8                      | ARR 0.90E-6 0 0       |
| 856 | C5_RO_O7 -> C5_RO2_O9                      | ARR 0.85E-6 0 0       |
| 857 | C5_RO_O8 -> C5_RO2_O10                     | ARR 0.70E-6 0 0       |
| 858 | BZo_RO2_O7 + NO -> BZo_O5_NO3              | ARR 0.024E-12 0 -360  |
| 859 | BZo_RO2_O9 + NO -> BZo_O7_NO3              | ARR 0.014E-12 0 -360  |
| 860 | BZo_RO2_O11 + NO -> BZo_O9_NO3             | ARR 0.324E-12 0 -360  |
| 861 | BZeo_RO2_O6 + NO -> BZeo_O4_NO3            | ARR 0.005E-12 0 -360  |
| 862 | BZeo_RO2_O8 + NO -> BZeo_O6_NO3            | ARR 0.016E-12 0 -360  |
| 863 | BZeo_RO2_O10 + NO -> BZeo_O8_NO3           | ARR 0.027E-12 0 -360  |
| 864 | C5_RO2_O6 + NO -> C5e_O4_NO3               | ARR 0.108E-12 0 -360  |
| 865 | C5_RO2_O7 + NO -> C5_O5_NO3                | ARR 0.011E-12 0 -360  |
| 866 | C5_RO2_O8 + NO -> C5e_O6_NO3               | ARR 0.022E-12 0 -360  |
| 867 | C5_RO2_O9 + NO -> C5_O7_NO3                | ARR 0.054E-12 0 -360  |
| 868 | C5_RO2_O10 + NO -> C5e_O8_NO3              | ARR 0.054E-12 0 -360  |
| 869 | BZo_RO2_O7 + NO -> BZo2_RO_O6 + NO2        | ARR 2.422E-12 0 -360  |
| 870 | BZo_RO2_O9 + NO -> BZo2_RO_O8 + NO2        | ARR 2.641E-12 0 -360  |
| 871 | BZo_RO2_O11 + NO -> BZo2_RO_O10 + NO2      | ARR 2.511E-12 0 -360  |
| 872 | BZeo_RO2_O6 + NO -> BZeo2_RO_O5 + NO2      | ARR 2.425E-12 0 -360  |
| 873 | BZeo_RO2_O8 + NO -> BZeo2_RO_O7 + NO2      | ARR 2.414E-12 0 -360  |
| 874 | BZeo_RO2_O10 + NO -> BZeo2_RO_O9 + NO2     | ARR 1.593E-12 0 -360  |
| 875 | C5_RO2_O6 + NO -> C5_RO_O5 + NO2           | ARR 2.592E-12 0 -360  |
| 876 | C5_RO2_O7 + NO -> C5_RO_O6 + NO2           | ARR 2.695E-12 0 -360  |
| 877 | C5_RO2_O8 + NO -> C5_RO_O7 + NO2           | ARR 2.689E-12 0 -360  |
| 878 | C5_RO2_O9 + NO -> C5_RO_O8 + NO2           | ARR 2.646E-12 0 -360  |
| 879 | C5_RO2_O10 + NO -> C5_RO_O9 + NO2          | ARR 2.646E-12 0 -360  |
| 880 | BZo_RO2_O7 + NO -> BZo_O5_O + NO2 + HO2    | ARR 0.27E-12 0 -360   |
| 881 | BZo_RO2_O9 + NO -> BZo_O7_O + NO2 + HO2    | ARR 0.054E-12 0 -360  |
| 882 | BZo_RO2_O11 + NO -> BZo_O9_O + NO2 + HO2   | ARR 0.081E-12 0 -360  |
| 883 | BZeo_RO2_O6 + NO -> BZeo_O4_O + NO2 + HO2  | ARR 0.27E-12 0 -360   |
| 884 | BZeo_RO2_O8 + NO -> BZeo_O6_O + NO2 + HO2  | ARR 0.27E-12 0 -360   |
| 885 | BZeo_RO2_O10 + NO -> BZeo_O8_O + NO2 + HO2 | ARR 1.08E-12 0 -360   |
| 886 | BZo_RO2_O7 + HO2 -> BZo_O5_OOH             | ARR 0.022E-13 0 -1300 |
| 887 | BZo_RO2_O9 + HO2 -> BZo_O7_OOH             | ARR 0.134E-13 0 -1300 |

|     |                                           |                        |
|-----|-------------------------------------------|------------------------|
| 888 | BZo_RO2_O11 + HO2 -> BZo_O9_OOH           | ARR 0.448E-13 0 -1300  |
| 889 | BZeo_RO2_O6 + HO2 -> BZeo_O4_OOH          | ARR 1.344E-13 0 -1300  |
| 890 | BZeo_RO2_O8 + HO2 -> BZeo_O6_OOH          | ARR 0.09E-13 0 -1300   |
| 891 | BZeo_RO2_O10 + HO2 -> BZeo_O8_OOH         | ARR 1.232E-13 0 -1300  |
| 892 | C5_RO2_O6 + HO2 -> C5e_O4_OOH             | ARR 0.01E-13 0 -1300   |
| 893 | C5_RO2_O7 + HO2 -> C5_O5_OOH              | ARR 0.616E-13 0 -1300  |
| 894 | C5_RO2_O8 + HO2 -> C5e_O6_OOH             | ARR 1.233E-13 0 -1300  |
| 895 | C5_RO2_O9 + HO2 -> C5_O7_OOH              | ARR 0.205E-13 0 -1300  |
| 896 | C5_RO2_O10 + HO2 -> C5e_O8_OOH            | ARR 1.233E-13 0 -1300  |
| 897 | BZo_RO2_O7 + HO2 -> BZo_RO_O6 + OH        | ARR 2.218E-13 0 -1300  |
| 898 | BZo_RO2_O9 + HO2 -> BZo_RO_O8 + OH        | ARR 2.061E-13 0 -1300  |
| 899 | BZo_RO2_O11 + HO2 -> BZo_RO_O10 + OH      | ARR 1.905E-13 0 -1300  |
| 900 | BZeo_RO2_O6 + HO2 -> BZeo_RO_O5 + OH      | ARR 0.896E-13 0 -1300  |
| 901 | BZeo_RO2_O8 + HO2 -> BZeo_RO_O7 + OH      | ARR 2.196E-13 0 -1300  |
| 902 | BZeo_RO2_O10 + HO2 -> BZeo_RO_O9 + OH     | ARR 1.008E-13 0 -1300  |
| 903 | C5_RO2_O6 + HO2 -> MALDIAL + CO + HO2     | ARR 2.229E-13 0 -1300  |
| 904 | C5_RO2_O7 + HO2 -> MALDIAL + CO + HO2     | ARR 0.896E-13 0 -1300  |
| 905 | C5_RO2_O8 + HO2 -> MALDIAL + CO + HO2     | ARR 0.896E-13 0 -1300  |
| 906 | C5_RO2_O9 + HO2 -> MALDIAL + CO + HO2     | ARR 2.017E-13 0 -1300  |
| 907 | C5_RO2_O10 + HO2 -> MALDIAL + CO + HO2    | ARR 0.896E-13 0 -1300  |
| 908 | BZo_RO2_O7 -> BZo_RO_O6                   | RO2 1 ARR 0.63E-11 0 0 |
| 909 | BZo_RO2_O9 -> BZo_RO_O8                   | RO2 1 ARR 1.29E-11 0 0 |
| 910 | BZo_RO2_O11 -> BZo_RO_O10                 | RO2 1 ARR 1.95E-11 0 0 |
| 911 | BZeo_RO2_O6 -> BZeo_RO_O5                 | RO2 1 ARR 0.3E-11 0 0  |
| 912 | BZeo_RO2_O8 -> BZeo_RO_O7                 | RO2 1 ARR 0.96E-11 0 0 |
| 913 | BZeo_RO2_O10 -> BZeo_RO_O9                | RO2 1 ARR 1.62E-11 0 0 |
| 914 | BZo_RO2_O7 + BZo_RO2_O7 -> BZoO6_BZoO6    | ARR 4.17E-11 0 0       |
| 915 | BZo_RO2_O7 + BZo_RO2_O9 -> BZoO6_BZoO8    | ARR 1.0E-10 0 0        |
| 916 | BZo_RO2_O7 + BZo_RO2_O11 -> BZoO6_BZoO10  | ARR 9.69E-11 0 0       |
| 917 | BZo_RO2_O7 + BZeo_RO2_O6 -> BZoO6_BZeoO5  | ARR 2.79E-11 0 0       |
| 918 | BZo_RO2_O7 + BZeo_RO2_O8 -> BZoO6_BZeoO7  | ARR 5.55E-11 0 0       |
| 919 | BZo_RO2_O7 + BZeo_RO2_O10 -> BZoO6_BZeoO9 | ARR 8.31E-11 0 0       |
| 920 | BZo_RO2_O7 + C5_RO2_O6 -> BZoO6_C5eO5     | ARR 4.51E-11 0 0       |
| 921 | BZo_RO2_O7 + C5_RO2_O7 -> BZoO6_C5O6      | ARR 5.89E-11 0 0       |
| 922 | BZo_RO2_O7 + C5_RO2_O8 -> BZoO6_C5eO7     | ARR 7.27E-11 0 0       |
| 923 | BZo_RO2_O7 + C5_RO2_O9 -> BZoO6_C5O8      | ARR 8.65E-11 0 0       |
| 924 | BZo_RO2_O7 + C5_RO2_O10 -> BZoO6_C5eO9    | ARR 1.0E-10 0 0        |
| 925 | BZo_RO2_O7 + BZBIPERO2 -> BZoO6_BZBI      | ARR 0.21E-11 0 0       |
| 926 | BZo_RO2_O7 + BZEMUCCO3 -> BZoO6_BZMUa     | ARR 1.24E-11 0 0       |
| 927 | BZo_RO2_O7 + BZEMUCO2 -> BZoO6_BZMUb      | ARR 2.79E-11 0 0       |
| 928 | BZo_RO2_O7 + C5DIALO2 -> BZoO6_C5DI       | ARR 3.0E-13 0 0        |
| 929 | BZo_RO2_O7 + NPHENO2 -> BZoO6_NPHa        | ARR 6.67E-11 0 0       |
| 930 | BZo_RO2_O7 + PHENO2 -> BZoO6_PHEN         | ARR 2.79E-11 0 0       |
| 931 | BZo_RO2_O7 + MALDIALCO3 -> BZoO6_MALa     | ARR 3.0E-13 0 0        |
| 932 | BZo_RO2_O7 + EPXDLCO3 -> BZoO6_EPX        | ARR 3.0E-13 0 0        |
| 933 | BZo_RO2_O7 + C3DIALO2 -> BZoO6_C3DI       | ARR 3.0E-13 0 0        |

|     |                                           |                  |
|-----|-------------------------------------------|------------------|
| 934 | BZo_RO2_O7 + MALDIALO2 -> BZoO6_MALb      | ARR 3.0E-13 0 0  |
| 935 | BZo_RO2_O7 + C6H5O2 -> BZoO6_C6a          | ARR 3.0E-13 0 0  |
| 936 | BZo_RO2_O7 + NBZFUO2 -> BZoO6_NBZa        | ARR 3.05E-11 0 0 |
| 937 | BZo_RO2_O7 + BZFUO2 -> BZoO6_BZFU         | ARR 3.0E-13 0 0  |
| 938 | BZo_RO2_O7 + HCOCOHCO3 -> BZoO6_C3a       | ARR 3.0E-13 0 0  |
| 939 | BZo_RO2_O7 + CATEC1O2 -> BZoO6_CATE       | ARR 3.0E-13 0 0  |
| 940 | BZo_RO2_O7 + HCOCO3 -> BZoO6_C2a          | ARR 3.0E-13 0 0  |
| 941 | BZo_RO2_O7 + HCOCH2O2 -> BZoO6_C2b        | ARR 3.0E-13 0 0  |
| 942 | BZo_RO2_O7 + NPHEN1O2 -> BZoO6_NPHb       | ARR 9.78E-12 0 0 |
| 943 | BZo_RO2_O7 + NNCATECO2 -> BZoO6_NNC       | ARR 1.0E-10 0 0  |
| 944 | BZo_RO2_O7 + NCATECO2 -> BZoO6_NCAT       | ARR 8.05E-11 0 0 |
| 945 | BZo_RO2_O7 + NBZQO2 -> BZoO6_NBZb         | ARR 5.12E-11 0 0 |
| 946 | BZo_RO2_O7 + PBZQO2 -> BZoO6_PBZ          | ARR 1.24E-11 0 0 |
| 947 | BZo_RO2_O7 + MALANHYO2 -> BZoO6_MALc      | ARR 3.75E-12 0 0 |
| 948 | BZo_RO2_O7 + NDNPHENO2 -> BZoO6_NDN       | ARR 1.0E-10 0 0  |
| 949 | BZo_RO2_O7 + DNPHEO2 -> BZoO6_DNP         | ARR 1.0E-10 0 0  |
| 950 | BZo_RO2_O7 + HOCH2CO3 -> BZoO6_C2c        | ARR 3.0E-13 0 0  |
| 951 | BZo_RO2_O7 + C5CO2OHC03 -> BZoO6_C5a      | ARR 2.62E-11 0 0 |
| 952 | BZo_RO2_O7 + C4CO2DBC03 -> BZoO6_C4a      | ARR 3.0E-13 0 0  |
| 953 | BZo_RO2_O9 + BZo_RO2_O9 -> BZoO8_BZoO8    | ARR 9.69E-11 0 0 |
| 954 | BZo_RO2_O9 + BZo_RO2_O11 -> BZoO8_BZoO10  | ARR 1.0E-10 0 0  |
| 955 | BZo_RO2_O9 + BZeo_RO2_O6 -> BZoO8_BZeoO5  | ARR 5.55E-11 0 0 |
| 956 | BZo_RO2_O9 + BZeo_RO2_O8 -> BZoO8_BZeoO7  | ARR 8.31E-11 0 0 |
| 957 | BZo_RO2_O9 + BZeo_RO2_O10 -> BZoO8_BZeoO9 | ARR 1.0E-10 0 0  |
| 958 | BZo_RO2_O9 + C5_RO2_O6 -> BZoO8_C5eO5     | ARR 7.27E-11 0 0 |
| 959 | BZo_RO2_O9 + C5_RO2_O7 -> BZoO8_C5O6      | ARR 8.65E-11 0 0 |
| 960 | BZo_RO2_O9 + C5_RO2_O8 -> BZoO8_C5eO7     | ARR 1.0E-10 0 0  |
| 961 | BZo_RO2_O9 + C5_RO2_O9 -> BZoO8_C5O8      | ARR 1.0E-10 0 0  |
| 962 | BZo_RO2_O9 + C5_RO2_O10 -> BZoO8_C5eO9    | ARR 1.0E-10 0 0  |
| 963 | BZo_RO2_O9 + BZBIPERO2 -> BZoO8_BZBI      | ARR 2.08E-11 0 0 |
| 964 | BZo_RO2_O9 + BZEMUCCO3 -> BZoO8_BZMUa     | ARR 4.0E-11 0 0  |
| 965 | BZo_RO2_O9 + BZEMUCO2 -> BZoO8_BZMUb      | ARR 5.55E-11 0 0 |
| 966 | BZo_RO2_O9 + C5DIALO2 -> BZoO8_C5DI       | ARR 1.58E-11 0 0 |
| 967 | BZo_RO2_O9 + NPHENO2 -> BZoO8_NPHa        | ARR 9.43E-11 0 0 |
| 968 | BZo_RO2_O9 + PHENO2 -> BZoO8_PHEN         | ARR 5.55E-11 0 0 |
| 969 | BZo_RO2_O9 + MALDIALCO3 -> BZoO8_MALa     | ARR 3.75E-12 0 0 |
| 970 | BZo_RO2_O9 + EPXDLCO3 -> BZoO8_EPX        | ARR 1.75E-11 0 0 |
| 971 | BZo_RO2_O9 + C3DIALO2 -> BZoO8_C3DI       | ARR 3.0E-13 0 0  |
| 972 | BZo_RO2_O9 + MALDIALO2 -> BZoO8_MALb      | ARR 1.93E-11 0 0 |
| 973 | BZo_RO2_O9 + C6H5O2 -> BZoO8_C6a          | ARR 3.0E-13 0 0  |
| 974 | BZo_RO2_O9 + NBZFUO2 -> BZoO8_NBZa        | ARR 5.81E-11 0 0 |
| 975 | BZo_RO2_O9 + BZFUO2 -> BZoO8_BZFU         | ARR 1.93E-11 0 0 |
| 976 | BZo_RO2_O9 + HCOCOHCO3 -> BZoO8_C3a       | ARR 7.2E-12 0 0  |
| 977 | BZo_RO2_O9 + CATEC1O2 -> BZoO8_CATE       | ARR 1.24E-11 0 0 |
| 978 | BZo_RO2_O9 + HCOCO3 -> BZoO8_C2a          | ARR 3.0E-13 0 0  |
| 979 | BZo_RO2_O9 + HCOCH2O2 -> BZoO8_C2b        | ARR 3.0E-13 0 0  |

|      |                                             |                  |
|------|---------------------------------------------|------------------|
| 980  | BZo_RO2_O9 + NPHEN1O2 -> BZoO8_NPHb         | ARR 3.74E-11 0 0 |
| 981  | BZo_RO2_O9 + NNCATECO2 -> BZoO8_NNC         | ARR 1.0E-10 0 0  |
| 982  | BZo_RO2_O9 + NCATECO2 -> BZoO8_NCAT         | ARR 1.0E-10 0 0  |
| 983  | BZo_RO2_O9 + NBZQO2 -> BZoO8_NBZb           | ARR 7.87E-11 0 0 |
| 984  | BZo_RO2_O9 + PBZQO2 -> BZoO8_PBZ            | ARR 4.0E-11 0 0  |
| 985  | BZo_RO2_O9 + MALANHYO2 -> BZoO8_MALc        | ARR 3.13E-11 0 0 |
| 986  | BZo_RO2_O9 + NDNPHENO2 -> BZoO8_NDN         | ARR 1.0E-10 0 0  |
| 987  | BZo_RO2_O9 + DNPHEO2 -> BZoO8_DNP           | ARR 1.0E-10 0 0  |
| 988  | BZo_RO2_O9 + HOCH2CO3 -> BZoO8_C2c          | ARR 3.0E-13 0 0  |
| 989  | BZo_RO2_O9 + C5CO2OHC03 -> BZoO8_C5a        | ARR 5.37E-11 0 0 |
| 990  | BZo_RO2_O9 + C4CO2DBC03 -> BZoO8_C4a        | ARR 2.79E-11 0 0 |
| 991  | BZo_RO2_O11 + BZo_RO2_O11 -> BZoO10_BZoO10  | ARR 1.0E-10 0 0  |
| 992  | BZo_RO2_O11 + BZeo_RO2_O6 -> BZoO10_BZeoO5  | ARR 8.31E-11 0 0 |
| 993  | BZo_RO2_O11 + BZeo_RO2_O8 -> BZoO10_BZeoO7  | ARR 1.0E-10 0 0  |
| 994  | BZo_RO2_O11 + BZeo_RO2_O10 -> BZoO10_BZeoO9 | ARR 1.0E-10 0 0  |
| 995  | BZo_RO2_O11 + C5_RO2_O6 -> BZoO10_C5eO5     | ARR 1.0E-10 0 0  |
| 996  | BZo_RO2_O11 + C5_RO2_O7 -> BZoO10_C5O6      | ARR 1.0E-10 0 0  |
| 997  | BZo_RO2_O11 + C5_RO2_O8 -> BZoO10_C5eO7     | ARR 1.0E-10 0 0  |
| 998  | BZo_RO2_O11 + C5_RO2_O9 -> BZoO10_C5O8      | ARR 1.0E-10 0 0  |
| 999  | BZo_RO2_O11 + C5_RO2_O10 -> BZoO10_C5eO9    | ARR 1.0E-10 0 0  |
| 1000 | BZo_RO2_O11 + BZBIPERO2 -> BZoO10_BZBI      | ARR 1.0E-10 0 0  |
| 1001 | BZo_RO2_O11 + BZEMUCCO3 -> BZoO10_BZMUa     | ARR 6.75E-11 0 0 |
| 1002 | BZo_RO2_O11 + BZEMUCO2 -> BZoO10_BZMUb      | ARR 8.31E-11 0 0 |
| 1003 | BZo_RO2_O11 + C5DIALO2 -> BZoO10_C5DI       | ARR 4.34E-11 0 0 |
| 1004 | BZo_RO2_O11 + NPHEO2 -> BZoO10_NPHa         | ARR 1.0E-10 0 0  |
| 1005 | BZo_RO2_O11 + PHENO2 -> BZoO10_PHEN         | ARR 8.31E-11 0 0 |
| 1006 | BZo_RO2_O11 + MALDIALCO3 -> BZoO10_MALa     | ARR 3.13E-11 0 0 |
| 1007 | BZo_RO2_O11 + EPXDLCO3 -> BZoO10_EPX        | ARR 4.51E-11 0 0 |
| 1008 | BZo_RO2_O11 + C3DIALO2 -> BZoO10_C3DI       | ARR 2.1E-11 0 0  |
| 1009 | BZo_RO2_O11 + MALDIALO2 -> BZoO10_MALb      | ARR 4.69E-11 0 0 |
| 1010 | BZo_RO2_O11 + C6H5O2 -> BZoO10_C6a          | ARR 2.62E-11 0 0 |
| 1011 | BZo_RO2_O11 + NBZFUO2 -> BZoO10_NBZa        | ARR 8.56E-11 0 0 |
| 1012 | BZo_RO2_O11 + BZFUO2 -> BZoO10_BZFU         | ARR 4.69E-11 0 0 |
| 1013 | BZo_RO2_O11 + HCOCOHCO3 -> BZoO10_C3a       | ARR 3.48E-11 0 0 |
| 1014 | BZo_RO2_O11 + CATEC1O2 -> BZoO10_CATE       | ARR 4.0E-11 0 0  |
| 1015 | BZo_RO2_O11 + HCOCO3 -> BZoO10_C2a          | ARR 8.92E-12 0 0 |
| 1016 | BZo_RO2_O11 + HCOCH2O2 -> BZoO10_C2b        | ARR 3.0E-13 0 0  |
| 1017 | BZo_RO2_O11 + NPHEN1O2 -> BZoO10_NPHb       | ARR 6.5E-11 0 0  |
| 1018 | BZo_RO2_O11 + NNCATECO2 -> BZoO10_NNC       | ARR 1.0E-10 0 0  |
| 1019 | BZo_RO2_O11 + NCATECO2 -> BZoO10_NCAT       | ARR 1.0E-10 0 0  |
| 1020 | BZo_RO2_O11 + NBZQO2 -> BZoO10_NBZb         | ARR 1.0E-10 0 0  |
| 1021 | BZo_RO2_O11 + PBZQO2 -> BZoO10_PBZ          | ARR 6.75E-11 0 0 |
| 1022 | BZo_RO2_O11 + MALANHYO2 -> BZoO10_MALc      | ARR 5.89E-11 0 0 |
| 1023 | BZo_RO2_O11 + NDNPHENO2 -> BZoO10_NDN       | ARR 1.0E-10 0 0  |
| 1024 | BZo_RO2_O11 + DNPHEO2 -> BZoO10_DNP         | ARR 1.0E-10 0 0  |
| 1025 | BZo_RO2_O11 + HOCH2CO3 -> BZoO10_C2c        | ARR 1.06E-11 0 0 |

|      |                                             |                  |
|------|---------------------------------------------|------------------|
| 1026 | BZo_RO2_O11 + C5CO2OHC03 -> BZoO10_C5a      | ARR 8.13E-11 0 0 |
| 1027 | BZo_RO2_O11 + C4CO2DBC03 -> BZoO10_C4a      | ARR 5.55E-11 0 0 |
| 1028 | BZeo_RO2_O6 + BZeo_RO2_O6 -> BZeoO5_BZeoO5  | ARR 1.41E-11 0 0 |
| 1029 | BZeo_RO2_O6 + BZeo_RO2_O8 -> BZeoO5_BZeoO7  | ARR 4.17E-11 0 0 |
| 1030 | BZeo_RO2_O6 + BZeo_RO2_O10 -> BZeoO5_BZeoO9 | ARR 1.0E-10 0 0  |
| 1031 | BZeo_RO2_O6 + C5_RO2_O6 -> BZeoO5_C5eO5     | ARR 3.13E-11 0 0 |
| 1032 | BZeo_RO2_O6 + C5_RO2_O7 -> BZeoO5_C5O6      | ARR 4.51E-11 0 0 |
| 1033 | BZeo_RO2_O6 + C5_RO2_O8 -> BZeoO5_C5eO7     | ARR 5.89E-11 0 0 |
| 1034 | BZeo_RO2_O6 + C5_RO2_O9 -> BZeoO5_C5O8      | ARR 7.27E-11 0 0 |
| 1035 | BZeo_RO2_O6 + C5_RO2_O10 -> BZeoO5_C5eO9    | ARR 8.65E-11 0 0 |
| 1036 | BZeo_RO2_O6 + BZBIPERO2 -> BZeoO5_BZBI      | ARR 3.0E-13 0 0  |
| 1037 | BZeo_RO2_O6 + BZEMUCCO3 -> BZeoO5_BZMUa     | ARR 3.0E-13 0 0  |
| 1038 | BZeo_RO2_O6 + BZEMUCO2 -> BZeoO5_BZMUb      | ARR 1.41E-11 0 0 |
| 1039 | BZeo_RO2_O6 + C5DIALO2 -> BZeoO5_C5DI       | ARR 3.0E-13 0 0  |
| 1040 | BZeo_RO2_O6 + NPHEO2 -> BZeoO5_NPHa         | ARR 5.29E-11 0 0 |
| 1041 | BZeo_RO2_O6 + PHENO2 -> BZeoO5_PHEN         | ARR 1.41E-11 0 0 |
| 1042 | BZeo_RO2_O6 + MALDIALCO3 -> BZeoO5_MALa     | ARR 3.0E-13 0 0  |
| 1043 | BZeo_RO2_O6 + EPXDLCO3 -> BZeoO5_EPX        | ARR 3.0E-13 0 0  |
| 1044 | BZeo_RO2_O6 + C3DIALO2 -> BZeoO5_C3DI       | ARR 3.0E-13 0 0  |
| 1045 | BZeo_RO2_O6 + MALDIALO2 -> BZeoO5_MALb      | ARR 3.0E-13 0 0  |
| 1046 | BZeo_RO2_O6 + C6H5O2 -> BZeoO5_C6a          | ARR 3.0E-13 0 0  |
| 1047 | BZeo_RO2_O6 + NBZFUO2 -> BZeoO5_NBZa        | ARR 1.67E-11 0 0 |
| 1048 | BZeo_RO2_O6 + BZFUO2 -> BZeoO5_BZFU         | ARR 3.0E-13 0 0  |
| 1049 | BZeo_RO2_O6 + HCOCOHC03 -> BZeoO5_C3a       | ARR 3.0E-13 0 0  |
| 1050 | BZeo_RO2_O6 + CATEC1O2 -> BZeoO5_CATE       | ARR 3.0E-13 0 0  |
| 1051 | BZeo_RO2_O6 + HCOCO3 -> BZeoO5_C2a          | ARR 3.0E-13 0 0  |
| 1052 | BZeo_RO2_O6 + HCOCH2O2 -> BZeoO5_C2b        | ARR 3.0E-13 0 0  |
| 1053 | BZeo_RO2_O6 + NPHEO1O2 -> BZeoO5_NPHb       | ARR 3.0E-13 0 0  |
| 1054 | BZeo_RO2_O6 + NNCATECO2 -> BZeoO5_NNC       | ARR 1.0E-10 0 0  |
| 1055 | BZeo_RO2_O6 + NCATECO2 -> BZeoO5_NCAT       | ARR 6.67E-11 0 0 |
| 1056 | BZeo_RO2_O6 + NBZQO2 -> BZeoO5_NBZb         | ARR 3.74E-11 0 0 |
| 1057 | BZeo_RO2_O6 + PBZQO2 -> BZeoO5_PBZ          | ARR 3.0E-13 0 0  |
| 1058 | BZeo_RO2_O6 + MALANHYO2 -> BZeoO5_MALc      | ARR 3.0E-13 0 0  |
| 1059 | BZeo_RO2_O6 + NDNPHENO2 -> BZeoO5_NDN       | ARR 1.0E-10 0 0  |
| 1060 | BZeo_RO2_O6 + DNPHEO2 -> BZeoO5_DNP         | ARR 9.17E-11 0 0 |
| 1061 | BZeo_RO2_O6 + HOCH2CO3 -> BZeoO5_C2c        | ARR 3.0E-13 0 0  |
| 1062 | BZeo_RO2_O6 + C5CO2OHC03 -> BZeoO5_C5a      | ARR 1.24E-11 0 0 |
| 1063 | BZeo_RO2_O6 + C4CO2DBC03 -> BZeoO5_C4a      | ARR 3.0E-13 0 0  |
| 1064 | BZeo_RO2_O8 + BZeo_RO2_O8 -> BZeoO7_BZeoO7  | ARR 1.0E-10 0 0  |
| 1065 | BZeo_RO2_O8 + BZeo_RO2_O10 -> BZeoO7_BZeoO9 | ARR 9.69E-11 0 0 |
| 1066 | BZeo_RO2_O8 + C5_RO2_O6 -> BZeoO7_C5eO5     | ARR 5.89E-11 0 0 |
| 1067 | BZeo_RO2_O8 + C5_RO2_O7 -> BZeoO7_C5O6      | ARR 7.27E-11 0 0 |
| 1068 | BZeo_RO2_O8 + C5_RO2_O8 -> BZeoO7_C5eO7     | ARR 8.65E-11 0 0 |
| 1069 | BZeo_RO2_O8 + C5_RO2_O9 -> BZeoO7_C5O8      | ARR 1.0E-10 0 0  |
| 1070 | BZeo_RO2_O8 + C5_RO2_O10 -> BZeoO7_C5eO9    | ARR 1.0E-10 0 0  |
| 1071 | BZeo_RO2_O8 + BZBIPERO2 -> BZeoO7_BZBI      | ARR 0.84E-11 0 0 |

|      |                                              |                  |
|------|----------------------------------------------|------------------|
| 1072 | BZeo_RO2_O8 + BZEMUCCO3 -> BZeoO7_BZMUa      | ARR 2.62E-11 0 0 |
| 1073 | BZeo_RO2_O8 + BZEMUCO2 -> BZeoO7_BZMUb       | ARR 4.17E-11 0 0 |
| 1074 | BZeo_RO2_O8 + C5DIALO2 -> BZeoO7_C5DI        | ARR 2.02E-12 0 0 |
| 1075 | BZeo_RO2_O8 + NPHEO2 -> BZeoO7_NPHa          | ARR 8.05E-11 0 0 |
| 1076 | BZeo_RO2_O8 + PHENO2 -> BZeoO7_PHEN          | ARR 4.17E-11 0 0 |
| 1077 | BZeo_RO2_O8 + MALDIALCO3 -> BZeoO7_MALa      | ARR 3.0E-13 0 0  |
| 1078 | BZeo_RO2_O8 + EPXDLCO3 -> BZeoO7_EPX         | ARR 3.75E-12 0 0 |
| 1079 | BZeo_RO2_O8 + C3DIALO2 -> BZeoO7_C3DI        | ARR 3.0E-13 0 0  |
| 1080 | BZeo_RO2_O8 + MALDIALO2 -> BZeoO7_MALb       | ARR 5.47E-12 0 0 |
| 1081 | BZeo_RO2_O8 + C6H5O2 -> BZeoO7_C6a           | ARR 3.0E-13 0 0  |
| 1082 | BZeo_RO2_O8 + NBZFUO2 -> BZeoO7_NBZa         | ARR 4.43E-11 0 0 |
| 1083 | BZeo_RO2_O8 + BZFUO2 -> BZeoO7_BZFU          | ARR 5.47E-12 0 0 |
| 1084 | BZeo_RO2_O8 + HCOCOHCO3 -> BZeoO7_C3a        | ARR 3.0E-13 0 0  |
| 1085 | BZeo_RO2_O8 + CATEC1O2 -> BZeoO7_CATE        | ARR 3.0E-13 0 0  |
| 1086 | BZeo_RO2_O8 + HCOCO3 -> BZeoO7_C2a           | ARR 3.0E-13 0 0  |
| 1087 | BZeo_RO2_O8 + HCOCH2O2 -> BZeoO7_C2b         | ARR 3.0E-13 0 0  |
| 1088 | BZeo_RO2_O8 + NPHE1O2 -> BZeoO7_NPHb         | ARR 2.36E-11 0 0 |
| 1089 | BZeo_RO2_O8 + NNCATECO2 -> BZeoO7_NNC        | ARR 1.0E-10 0 0  |
| 1090 | BZeo_RO2_O8 + NCATECO2 -> BZeoO7_NCAT        | ARR 9.43E-11 0 0 |
| 1091 | BZeo_RO2_O8 + NBZQO2 -> BZeoO7_NBZb          | ARR 6.5E-11 0 0  |
| 1092 | BZeo_RO2_O8 + PBZQO2 -> BZeoO7_PBZ           | ARR 2.62E-11 0 0 |
| 1093 | BZeo_RO2_O8 + MALANHYO2 -> BZeoO7_MALc       | ARR 1.75E-11 0 0 |
| 1094 | BZeo_RO2_O8 + NDNPHENO2 -> BZeoO7_NDN        | ARR 1.0E-10 0 0  |
| 1095 | BZeo_RO2_O8 + DNPHEO2 -> BZeoO7_DNP          | ARR 1.0E-10 0 0  |
| 1096 | BZeo_RO2_O8 + HOCH2CO3 -> BZeoO7_C2c         | ARR 3.0E-13 0 0  |
| 1097 | BZeo_RO2_O8 + C5CO2OHCOC3 -> BZeoO7_C5a      | ARR 4.0E-11 0 0  |
| 1098 | BZeo_RO2_O8 + C4CO2DBCOC3 -> BZeoO7_C4a      | ARR 1.41E-11 0 0 |
| 1099 | BZeo_RO2_O10 + BZeo_RO2_O10 -> BZeoO9_BZeoO9 | ARR 1.0E-10 0 0  |
| 1100 | BZeo_RO2_O10 + C5_RO2_O6 -> BZeoO9_C5eO5     | ARR 8.65E-11 0 0 |
| 1101 | BZeo_RO2_O10 + C5_RO2_O7 -> BZeoO9_C5O6      | ARR 1.0E-10 0 0  |
| 1102 | BZeo_RO2_O10 + C5_RO2_O8 -> BZeoO9_C5eO7     | ARR 1.0E-10 0 0  |
| 1103 | BZeo_RO2_O10 + C5_RO2_O9 -> BZeoO9_C5O8      | ARR 1.0E-10 0 0  |
| 1104 | BZeo_RO2_O10 + C5_RO2_O10 -> BZeoO9_C5eO9    | ARR 1.0E-10 0 0  |
| 1105 | BZeo_RO2_O10 + BZBIPERO2 -> BZeoO9_BZBI      | ARR 5.55E-11 0 0 |
| 1106 | BZeo_RO2_O10 + BZEMUCCO3 -> BZeoO9_BZMUa     | ARR 5.37E-11 0 0 |
| 1107 | BZeo_RO2_O10 + BZEMUCO2 -> BZeoO9_BZMUb      | ARR 1.0E-10 0 0  |
| 1108 | BZeo_RO2_O10 + C5DIALO2 -> BZeoO9_C5DI       | ARR 2.96E-11 0 0 |
| 1109 | BZeo_RO2_O10 + NPHEO2 -> BZeoO9_NPHa         | ARR 1.0E-10 0 0  |
| 1110 | BZeo_RO2_O10 + PHENO2 -> BZeoO9_PHEN         | ARR 1.0E-10 0 0  |
| 1111 | BZeo_RO2_O10 + MALDIALCO3 -> BZeoO9_MALa     | ARR 1.75E-11 0 0 |
| 1112 | BZeo_RO2_O10 + EPXDLCO3 -> BZeoO9_EPX        | ARR 3.13E-11 0 0 |
| 1113 | BZeo_RO2_O10 + C3DIALO2 -> BZeoO9_C3DI       | ARR 7.2E-12 0 0  |
| 1114 | BZeo_RO2_O10 + MALDIALO2 -> BZeoO9_MALb      | ARR 3.31E-11 0 0 |
| 1115 | BZeo_RO2_O10 + C6H5O2 -> BZeoO9_C6a          | ARR 1.24E-11 0 0 |
| 1116 | BZeo_RO2_O10 + NBZFUO2 -> BZeoO9_NBZa        | ARR 7.19E-11 0 0 |
| 1117 | BZeo_RO2_O10 + BZFUO2 -> BZeoO9_BZFU         | ARR 3.31E-11 0 0 |

|      |                                         |                  |
|------|-----------------------------------------|------------------|
| 1118 | BZeo_RO2_O10 + HCOCOHC03 -> BZeoO9_C3a  | ARR 2.1E-11 0 0  |
| 1119 | BZeo_RO2_O10 + CATEC1O2 -> BZeoO9_CATE  | ARR 2.62E-11 0 0 |
| 1120 | BZeo_RO2_O10 + HCOCO3 -> BZeoO9_C2a     | ARR 3.0E-13 0 0  |
| 1121 | BZeo_RO2_O10 + HCOCH2O2 -> BZeoO9_C2b   | ARR 3.0E-13 0 0  |
| 1122 | BZeo_RO2_O10 + NPHEN1O2 -> BZeoO9_NPHb  | ARR 5.12E-11 0 0 |
| 1123 | BZeo_RO2_O10 + NNCATECO2 -> BZeoO9_NNC  | ARR 1.0E-10 0 0  |
| 1124 | BZeo_RO2_O10 + NCATECO2 -> BZeoO9_NCAT  | ARR 1.0E-10 0 0  |
| 1125 | BZeo_RO2_O10 + NBZQO2 -> BZeoO9_NBZb    | ARR 9.25E-11 0 0 |
| 1126 | BZeo_RO2_O10 + PBZQO2 -> BZeoO9_PBZ     | ARR 5.37E-11 0 0 |
| 1127 | BZeo_RO2_O10 + MALANHYO2 -> BZeoO9_MALc | ARR 4.51E-11 0 0 |
| 1128 | BZeo_RO2_O10 + NDNPHENO2 -> BZeoO9_NDN  | ARR 1.0E-10 0 0  |
| 1129 | BZeo_RO2_O10 + DNPHEO2 -> BZeoO9_DNP    | ARR 1.0E-10 0 0  |
| 1130 | BZeo_RO2_O10 + HOCH2CO3 -> BZeoO9_C2c   | ARR 3.0E-13 0 0  |
| 1131 | BZeo_RO2_O10 + C5CO2OHC03 -> BZeoO9_C5a | ARR 6.75E-11 0 0 |
| 1132 | BZeo_RO2_O10 + C4CO2DBC03 -> BZeoO9_C4a | ARR 4.17E-11 0 0 |
| 1133 | C5_RO2_O6 + C5_RO2_O6 -> C5eO5_C5eO5    | ARR 4.86E-11 0 0 |
| 1134 | C5_RO2_O6 + C5_RO2_O7 -> C5eO5_C5O6     | ARR 6.24E-11 0 0 |
| 1135 | C5_RO2_O6 + C5_RO2_O8 -> C5eO5_C5eO7    | ARR 7.62E-11 0 0 |
| 1136 | C5_RO2_O6 + C5_RO2_O9 -> C5eO5_C5O8     | ARR 9.0E-11 0 0  |
| 1137 | C5_RO2_O6 + C5_RO2_O10 -> C5eO5_C5eO9   | ARR 1.0E-10 0 0  |
| 1138 | C5_RO2_O6 + BZBIPERO2 -> C5eO5_BZBI     | ARR 1.75E-11 0 0 |
| 1139 | C5_RO2_O6 + BZEMUCCO3 -> C5eO5_BZMUa    | ARR 1.58E-11 0 0 |
| 1140 | C5_RO2_O6 + BZEMUCO2 -> C5eO5_BZMUb     | ARR 3.13E-11 0 0 |
| 1141 | C5_RO2_O6 + C5DIALO2 -> C5eO5_C5DI      | ARR 3.0E-13 0 0  |
| 1142 | C5_RO2_O6 + NPHENO2 -> C5eO5_NPHa       | ARR 7.01E-11 0 0 |
| 1143 | C5_RO2_O6 + PHENO2 -> C5eO5_PHEN        | ARR 3.13E-11 0 0 |
| 1144 | C5_RO2_O6 + MALDIALCO3 -> C5eO5_MALa    | ARR 3.0E-13 0 0  |
| 1145 | C5_RO2_O6 + EPXDLCO3 -> C5eO5_EPX       | ARR 3.0E-13 0 0  |
| 1146 | C5_RO2_O6 + C3DIALO2 -> C5eO5_C3DI      | ARR 3.0E-13 0 0  |
| 1147 | C5_RO2_O6 + MALDIALO2 -> C5eO5_MALb     | ARR 3.0E-13 0 0  |
| 1148 | C5_RO2_O6 + C6H5O2 -> C5eO5_C6a         | ARR 3.0E-13 0 0  |
| 1149 | C5_RO2_O6 + NBZFUO2 -> C5eO5_NBZa       | ARR 3.39E-11 0 0 |
| 1150 | C5_RO2_O6 + BZFUO2 -> C5eO5_BZFU        | ARR 3.0E-13 0 0  |
| 1151 | C5_RO2_O6 + HCOCOHC03 -> C5eO5_C3a      | ARR 3.0E-13 0 0  |
| 1152 | C5_RO2_O6 + CATEC1O2 -> C5eO5_CATE      | ARR 3.0E-13 0 0  |
| 1153 | C5_RO2_O6 + HCOCO3 -> C5eO5_C2a         | ARR 3.0E-13 0 0  |
| 1154 | C5_RO2_O6 + HCOCH2O2 -> C5eO5_C2b       | ARR 3.0E-13 0 0  |
| 1155 | C5_RO2_O6 + NPHEN1O2 -> C5eO5_NPHb      | ARR 1.32E-11 0 0 |
| 1156 | C5_RO2_O6 + NNCATECO2 -> C5eO5_NNC      | ARR 1.0E-10 0 0  |
| 1157 | C5_RO2_O6 + NCATECO2 -> C5eO5_NCAT      | ARR 8.39E-11 0 0 |
| 1158 | C5_RO2_O6 + NBZQO2 -> C5eO5_NBZb        | ARR 5.46E-11 0 0 |
| 1159 | C5_RO2_O6 + PBZQO2 -> C5eO5_PBZ         | ARR 1.58E-11 0 0 |
| 1160 | C5_RO2_O6 + MALANHYO2 -> C5eO5_MALc     | ARR 7.2E-12 0 0  |
| 1161 | C5_RO2_O6 + NDNPHENO2 -> C5eO5_NDN      | ARR 1.0E-10 0 0  |
| 1162 | C5_RO2_O6 + DNPHEO2 -> C5eO5_DNP        | ARR 1.0E-10 0 0  |
| 1163 | C5_RO2_O6 + HOCH2CO3 -> C5eO5_C2c       | ARR 3.0E-13 0 0  |

|      |                                       |                  |
|------|---------------------------------------|------------------|
| 1164 | C5_RO2_O6 + C5CO2OHCOC3 -> C5eO5_C5a  | ARR 2.96E-11 0 0 |
| 1165 | C5_RO2_O6 + C4CO2DBCOC3 -> C5eO5_C4a  | ARR 3.75E-12 0 0 |
| 1166 | C5_RO2_O7 + C5_RO2_O7 -> C5O6_C5O6    | ARR 7.62E-11 0 0 |
| 1167 | C5_RO2_O7 + C5_RO2_O8 -> C5O6_C5eO7   | ARR 9.0E-11 0 0  |
| 1168 | C5_RO2_O7 + C5_RO2_O9 -> C5O6_C5O8    | ARR 1.0E-10 0 0  |
| 1169 | C5_RO2_O7 + C5_RO2_O10 -> C5O6_C5eO9  | ARR 1.0E-10 0 0  |
| 1170 | C5_RO2_O7 + BZBIPERO2 -> C5O6_BZBI    | ARR 3.13E-11 0 0 |
| 1171 | C5_RO2_O7 + BZEMUCCOC3 -> C5O6_BZMUa  | ARR 2.96E-11 0 0 |
| 1172 | C5_RO2_O7 + BZEMUCOC2 -> C5O6_BZMUb   | ARR 4.51E-11 0 0 |
| 1173 | C5_RO2_O7 + C5DIALOC2 -> C5O6_C5DI    | ARR 5.47E-12 0 0 |
| 1174 | C5_RO2_O7 + NPHEOC2 -> C5O6_NPHa      | ARR 8.39E-11 0 0 |
| 1175 | C5_RO2_O7 + PHENOC2 -> C5O6_PHEN      | ARR 4.51E-11 0 0 |
| 1176 | C5_RO2_O7 + MALDIALCOC3 -> C5O6_MALa  | ARR 3.0E-13 0 0  |
| 1177 | C5_RO2_O7 + EPXDLCOC3 -> C5O6_EPX     | ARR 7.2E-12 0 0  |
| 1178 | C5_RO2_O7 + C3DIALOC2 -> C5O6_C3DI    | ARR 3.0E-13 0 0  |
| 1179 | C5_RO2_O7 + MALDIALOC2 -> C5O6_MALb   | ARR 8.92E-12 0 0 |
| 1180 | C5_RO2_O7 + C6H5OC2 -> C5O6_C6a       | ARR 3.0E-13 0 0  |
| 1181 | C5_RO2_O7 + NBZFUOC2 -> C5O6_NBZa     | ARR 4.77E-11 0 0 |
| 1182 | C5_RO2_O7 + BZFUOC2 -> C5O6_BZFU      | ARR 8.92E-12 0 0 |
| 1183 | C5_RO2_O7 + HCOCOCOC3 -> C5O6_C3a     | ARR 3.0E-13 0 0  |
| 1184 | C5_RO2_O7 + CATECIOC2 -> C5O6_CATE    | ARR 2.02E-12 0 0 |
| 1185 | C5_RO2_O7 + HCOCOC2 -> C5O6_C2a       | ARR 3.0E-13 0 0  |
| 1186 | C5_RO2_O7 + HCOCH2OC2 -> C5O6_C2b     | ARR 3.0E-13 0 0  |
| 1187 | C5_RO2_O7 + NPHEOCOC2 -> C5O6_NPHb    | ARR 2.7E-11 0 0  |
| 1188 | C5_RO2_O7 + NNCATECOC2 -> C5O6_NNC    | ARR 1.0E-10 0 0  |
| 1189 | C5_RO2_O7 + NCATECOC2 -> C5O6_NCAT    | ARR 9.77E-11 0 0 |
| 1190 | C5_RO2_O7 + NBZQOC2 -> C5O6_NBZb      | ARR 6.84E-11 0 0 |
| 1191 | C5_RO2_O7 + PBZQOC2 -> C5O6_PBZ       | ARR 2.96E-11 0 0 |
| 1192 | C5_RO2_O7 + MALANHYOC2 -> C5O6_MALc   | ARR 2.1E-11 0 0  |
| 1193 | C5_RO2_O7 + NDNPHENOC2 -> C5O6_NDN    | ARR 1.0E-10 0 0  |
| 1194 | C5_RO2_O7 + DNPHEOC2 -> C5O6_DNP      | ARR 1.0E-10 0 0  |
| 1195 | C5_RO2_O7 + HOCH2COC3 -> C5O6_C2c     | ARR 3.0E-13 0 0  |
| 1196 | C5_RO2_O7 + C5CO2OHCOC3 -> C5O6_C5a   | ARR 4.34E-11 0 0 |
| 1197 | C5_RO2_O7 + C4CO2DBCOC3 -> C5O6_C4a   | ARR 1.75E-11 0 0 |
| 1198 | C5_RO2_O8 + C5_RO2_O8 -> C5eO7_C5eO7  | ARR 1.0E-10 0 0  |
| 1199 | C5_RO2_O8 + C5_RO2_O9 -> C5eO7_C5O8   | ARR 1.0E-10 0 0  |
| 1200 | C5_RO2_O8 + C5_RO2_O10 -> C5eO7_C5eO9 | ARR 1.0E-10 0 0  |
| 1201 | C5_RO2_O8 + BZBIPERO2 -> C5eO7_BZBI   | ARR 1.35E-11 0 0 |
| 1202 | C5_RO2_O8 + BZEMUCCOC3 -> C5eO7_BZMUa | ARR 4.34E-11 0 0 |
| 1203 | C5_RO2_O8 + BZEMUCOC2 -> C5eO7_BZMUb  | ARR 5.89E-11 0 0 |
| 1204 | C5_RO2_O8 + C5DIALOC2 -> C5eO7_C5DI   | ARR 1.93E-11 0 0 |
| 1205 | C5_RO2_O8 + NPHEOC2 -> C5eO7_NPHa     | ARR 9.77E-11 0 0 |
| 1206 | C5_RO2_O8 + PHENOC2 -> C5eO7_PHEN     | ARR 5.89E-11 0 0 |
| 1207 | C5_RO2_O8 + MALDIALCOC3 -> C5eO7_MALa | ARR 7.2E-12 0 0  |
| 1208 | C5_RO2_O8 + EPXDLCOC3 -> C5eO7_EPX    | ARR 2.1E-11 0 0  |
| 1209 | C5_RO2_O8 + C3DIALOC2 -> C5eO7_C3DI   | ARR 3.0E-13 0 0  |

|      |                                      |                  |
|------|--------------------------------------|------------------|
| 1210 | C5_RO2_O8 + MALDIALO2 -> C5eO7_MALb  | ARR 2.27E-11 0 0 |
| 1211 | C5_RO2_O8 + C6H5O2 -> C5eO7_C6a      | ARR 2.02E-12 0 0 |
| 1212 | C5_RO2_O8 + NBZFUO2 -> C5eO7_NBZa    | ARR 6.15E-11 0 0 |
| 1213 | C5_RO2_O8 + BZFUO2 -> C5eO7_BZFU     | ARR 2.27E-11 0 0 |
| 1214 | C5_RO2_O8 + HCOCOHC03 -> C5eO7_C3a   | ARR 1.06E-11 0 0 |
| 1215 | C5_RO2_O8 + CATEC1O2 -> C5eO7_CATE   | ARR 1.58E-11 0 0 |
| 1216 | C5_RO2_O8 + HCOCO3 -> C5eO7_C2a      | ARR 3.0E-13 0 0  |
| 1217 | C5_RO2_O8 + HCOCH2O2 -> C5eO7_C2b    | ARR 3.0E-13 0 0  |
| 1218 | C5_RO2_O8 + NPHEN1O2 -> C5eO7_NPHb   | ARR 4.08E-11 0 0 |
| 1219 | C5_RO2_O8 + NNCATECO2 -> C5eO7_NNC   | ARR 1.0E-10 0 0  |
| 1220 | C5_RO2_O8 + NCATECO2 -> C5eO7_NCAT   | ARR 1.0E-10 0 0  |
| 1221 | C5_RO2_O8 + NBZQO2 -> C5eO7_NBZb     | ARR 8.22E-11 0 0 |
| 1222 | C5_RO2_O8 + PBZQO2 -> C5eO7_PBZ      | ARR 4.34E-11 0 0 |
| 1223 | C5_RO2_O8 + MALANHYO2 -> C5eO7_MALc  | ARR 3.48E-11 0 0 |
| 1224 | C5_RO2_O8 + NDNPHENO2 -> C5eO7_NDN   | ARR 1.0E-10 0 0  |
| 1225 | C5_RO2_O8 + DNPHEO2 -> C5eO7_DNP     | ARR 1.0E-10 0 0  |
| 1226 | C5_RO2_O8 + HOCH2CO3 -> C5eO7_C2c    | ARR 3.0E-13 0 0  |
| 1227 | C5_RO2_O8 + C5CO2OHC03 -> C5eO7_C5a  | ARR 5.72E-11 0 0 |
| 1228 | C5_RO2_O8 + C4CO2DBC03 -> C5eO7_C4a  | ARR 3.13E-11 0 0 |
| 1229 | C5_RO2_O9 + C5_RO2_O9 -> C5O8_C5O8   | ARR 1.0E-10 0 0  |
| 1230 | C5_RO2_O9 + C5_RO2_O10 -> C5O8_C5eO9 | ARR 1.0E-10 0 0  |
| 1231 | C5_RO2_O9 + BZBIPERO2 -> C5O8_BZBI   | ARR 5.89E-11 0 0 |
| 1232 | C5_RO2_O9 + BZEMUCCO3 -> C5O8_BZMUa  | ARR 5.72E-11 0 0 |
| 1233 | C5_RO2_O9 + BZEMUCO2 -> C5O8_BZMUb   | ARR 7.27E-11 0 0 |
| 1234 | C5_RO2_O9 + C5DIALO2 -> C5O8_C5DI    | ARR 3.31E-11 0 0 |
| 1235 | C5_RO2_O9 + NPHENO2 -> C5O8_NPHa     | ARR 1.0E-10 0 0  |
| 1236 | C5_RO2_O9 + PHENO2 -> C5O8_PHEN      | ARR 7.27E-11 0 0 |
| 1237 | C5_RO2_O9 + MALDIALCO3 -> C5O8_MALa  | ARR 2.1E-11 0 0  |
| 1238 | C5_RO2_O9 + EPXDLCO3 -> C5O8_EPX     | ARR 3.48E-11 0 0 |
| 1239 | C5_RO2_O9 + C3DIALO2 -> C5O8_C3DI    | ARR 1.06E-11 0 0 |
| 1240 | C5_RO2_O9 + MALDIALO2 -> C5O8_MALb   | ARR 3.65E-11 0 0 |
| 1241 | C5_RO2_O9 + C6H5O2 -> C5O8_C6a       | ARR 1.58E-11 0 0 |
| 1242 | C5_RO2_O9 + NBZFUO2 -> C5O8_NBZa     | ARR 7.53E-11 0 0 |
| 1243 | C5_RO2_O9 + BZFUO2 -> C5O8_BZFU      | ARR 3.65E-11 0 0 |
| 1244 | C5_RO2_O9 + HCOCOHC03 -> C5O8_C3a    | ARR 2.44E-11 0 0 |
| 1245 | C5_RO2_O9 + CATEC1O2 -> C5O8_CATE    | ARR 2.96E-11 0 0 |
| 1246 | C5_RO2_O9 + HCOCO3 -> C5O8_C2a       | ARR 3.0E-13 0 0  |
| 1247 | C5_RO2_O9 + HCOCH2O2 -> C5O8_C2b     | ARR 3.0E-13 0 0  |
| 1248 | C5_RO2_O9 + NPHEN1O2 -> C5O8_NPHb    | ARR 5.46E-11 0 0 |
| 1249 | C5_RO2_O9 + NNCATECO2 -> C5O8_NNC    | ARR 1.0E-10 0 0  |
| 1250 | C5_RO2_O9 + NCATECO2 -> C5O8_NCAT    | ARR 1.0E-10 0 0  |
| 1251 | C5_RO2_O9 + NBZQO2 -> C5O8_NBZb      | ARR 9.6E-11 0 0  |
| 1252 | C5_RO2_O9 + PBZQO2 -> C5O8_PBZ       | ARR 5.72E-11 0 0 |
| 1253 | C5_RO2_O9 + MALANHYO2 -> C5O8_MALc   | ARR 4.86E-11 0 0 |
| 1254 | C5_RO2_O9 + NDNPHENO2 -> C5O8_NDN    | ARR 1.0E-10 0 0  |
| 1255 | C5_RO2_O9 + DNPHEO2 -> C5O8_DNP      | ARR 1.0E-10 0 0  |

|      |                                        |                  |
|------|----------------------------------------|------------------|
| 1256 | C5_RO2_O9 + HOCH2CO3 -> C5O8_C2c       | ARR 3.0E-13 0 0  |
| 1257 | C5_RO2_O9 + C5CO2OHCO3 -> C5O8_C5a     | ARR 7.1E-11 0 0  |
| 1258 | C5_RO2_O9 + C4CO2DBC03 -> C5O8_C4a     | ARR 4.51E-11 0 0 |
| 1259 | C5_RO2_O10 + C5_RO2_O10 -> C5eO9_C5eO9 | ARR 1.0E-10 0 0  |
| 1260 | C5_RO2_O10 + BZBIPERO2 -> C5eO9_BZBI   | ARR 7.27E-11 0 0 |
| 1261 | C5_RO2_O10 + BZEMUCCO3 -> C5eO9_BZMUa  | ARR 7.1E-11 0 0  |
| 1262 | C5_RO2_O10 + BZEMUCO2 -> C5eO9_BZMUb   | ARR 8.65E-11 0 0 |
| 1263 | C5_RO2_O10 + C5DIALO2 -> C5eO9_C5DI    | ARR 4.69E-11 0 0 |
| 1264 | C5_RO2_O10 + NPHENO2 -> C5eO9_NPHa     | ARR 1.0E-10 0 0  |
| 1265 | C5_RO2_O10 + PHENO2 -> C5eO9_PHEN      | ARR 8.65E-11 0 0 |
| 1266 | C5_RO2_O10 + MALDIALCO3 -> C5eO9_MALa  | ARR 3.48E-11 0 0 |
| 1267 | C5_RO2_O10 + EPXDLCO3 -> C5eO9_EPX     | ARR 4.86E-11 0 0 |
| 1268 | C5_RO2_O10 + C3DIALO2 -> C5eO9_C3DI    | ARR 2.44E-11 0 0 |
| 1269 | C5_RO2_O10 + MALDIALO2 -> C5eO9_MALb   | ARR 5.03E-11 0 0 |
| 1270 | C5_RO2_O10 + C6H5O2 -> C5eO9_C6a       | ARR 2.96E-11 0 0 |
| 1271 | C5_RO2_O10 + NBZFUO2 -> C5eO9_NBZa     | ARR 8.91E-11 0 0 |
| 1272 | C5_RO2_O10 + BZFUO2 -> C5eO9_BZFU      | ARR 5.03E-11 0 0 |
| 1273 | C5_RO2_O10 + HCOCOHC03 -> C5eO9_C3a    | ARR 3.82E-11 0 0 |
| 1274 | C5_RO2_O10 + CATEC1O2 -> C5eO9_CATE    | ARR 4.34E-11 0 0 |
| 1275 | C5_RO2_O10 + HCOCO3 -> C5eO9_C2a       | ARR 1.24E-11 0 0 |
| 1276 | C5_RO2_O10 + HCOCH2O2 -> C5eO9_C2b     | ARR 3.0E-13 0 0  |
| 1277 | C5_RO2_O10 + NPHEN1O2 -> C5eO9_NPHb    | ARR 6.84E-11 0 0 |
| 1278 | C5_RO2_O10 + NNCATECO2 -> C5eO9_NNC    | ARR 1.0E-10 0 0  |
| 1279 | C5_RO2_O10 + NCATECO2 -> C5eO9_NCAT    | ARR 1.0E-10 0 0  |
| 1280 | C5_RO2_O10 + NBZQO2 -> C5eO9_NBZb      | ARR 1.0E-10 0 0  |
| 1281 | C5_RO2_O10 + PBZQO2 -> C5eO9_PBZ       | ARR 7.1E-11 0 0  |
| 1282 | C5_RO2_O10 + MALANHYO2 -> C5eO9_MALc   | ARR 6.24E-11 0 0 |
| 1283 | C5_RO2_O10 + NDNPHENO2 -> C5eO9_NDN    | ARR 1.0E-10 0 0  |
| 1284 | C5_RO2_O10 + DNPHEO2 -> C5eO9_DNP      | ARR 1.0E-10 0 0  |
| 1285 | C5_RO2_O10 + HOCH2CO3 -> C5eO9_C2c     | ARR 1.41E-11 0 0 |
| 1286 | C5_RO2_O10 + C5CO2OHCO3 -> C5eO9_C5a   | ARR 8.48E-11 0 0 |
| 1287 | C5_RO2_O10 + C4CO2DBC03 -> C5eO9_C4a   | ARR 5.89E-11 0 0 |
| 1288 | BZBIPERO2 + BZBIPERO2 -> BZBI_BZBI     | ARR 2.1E-13 0 0  |
| 1289 | BZBIPERO2 + BZEMUCCO3 -> BZBI_BZMUa    | ARR 3.0E-13 0 0  |
| 1290 | BZBIPERO2 + BZEMUCO2 -> BZBI_BZMUb     | ARR 3.0E-13 0 0  |
| 1291 | BZBIPERO2 + C5DIALO2 -> BZBI_C5DI      | ARR 3.0E-13 0 0  |
| 1292 | BZBIPERO2 + NPHENO2 -> BZBI_NPHa       | ARR 3.91E-11 0 0 |
| 1293 | BZBIPERO2 + PHENO2 -> BZBI_PHEN        | ARR 3.0E-13 0 0  |
| 1294 | BZBIPERO2 + MALDIALCO3 -> BZBI_MALa    | ARR 3.0E-13 0 0  |
| 1295 | BZBIPERO2 + EPXDLCO3 -> BZBI_EPX       | ARR 3.0E-13 0 0  |
| 1296 | BZBIPERO2 + C3DIALO2 -> BZBI_C3DI      | ARR 3.0E-13 0 0  |
| 1297 | BZBIPERO2 + MALDIALO2 -> BZBI_MALb     | ARR 3.0E-13 0 0  |
| 1298 | BZBIPERO2 + C6H5O2 -> BZBI_C6a         | ARR 3.0E-13 0 0  |
| 1299 | BZBIPERO2 + NBZFUO2 -> BZBI_NBZa       | ARR 2.89E-12 0 0 |
| 1300 | BZBIPERO2 + BZFUO2 -> BZBI_BZFU        | ARR 3.0E-13 0 0  |
| 1301 | BZBIPERO2 + HCOCOHC03 -> BZBI_C3a      | ARR 3.0E-13 0 0  |

|      |                                      |                  |
|------|--------------------------------------|------------------|
| 1302 | BZBIPERO2 + CATEC1O2 -> BZBI_CATE    | ARR 3.0E-13 0 0  |
| 1303 | BZBIPERO2 + HCOCO3 -> BZBI_C2a       | ARR 3.0E-13 0 0  |
| 1304 | BZBIPERO2 + HCOCH2O2 -> BZBI_C2b     | ARR 3.0E-13 0 0  |
| 1305 | BZBIPERO2 + NPHEN1O2 -> BZBI_NPHb    | ARR 3.0E-13 0 0  |
| 1306 | BZBIPERO2 + NNCATECO2 -> BZBI_NNC    | ARR 9.17E-11 0 0 |
| 1307 | BZBIPERO2 + NCATECO2 -> BZBI_NCAT    | ARR 5.29E-11 0 0 |
| 1308 | BZBIPERO2 + NBZQO2 -> BZBI_NBZb      | ARR 2.36E-11 0 0 |
| 1309 | BZBIPERO2 + PBZQO2 -> BZBI_PBZ       | ARR 3.0E-13 0 0  |
| 1310 | BZBIPERO2 + MALANHYO2 -> BZBI_MALc   | ARR 3.0E-13 0 0  |
| 1311 | BZBIPERO2 + NDNPHENO2 -> BZBI_NDN    | ARR 1.0E-10 0 0  |
| 1312 | BZBIPERO2 + DNPHEO2 -> BZBI_DNP      | ARR 7.79E-11 0 0 |
| 1313 | BZBIPERO2 + HOCH2CO3 -> BZBI_C2c     | ARR 3.0E-13 0 0  |
| 1314 | BZBIPERO2 + C5CO2OHCO3 -> BZBI_C5a   | ARR 3.0E-13 0 0  |
| 1315 | BZBIPERO2 + C4CO2DBC03 -> BZBI_C4a   | ARR 3.0E-13 0 0  |
| 1316 | BZEMUCCO3 + BZEMUCCO3 -> BZMUa_BZMUa | ARR 3.0E-13 0 0  |
| 1317 | BZEMUCCO3 + BZEMUCO2 -> BZMUa_BZMUb  | ARR 3.0E-13 0 0  |
| 1318 | BZEMUCCO3 + C5DIALO2 -> BZMUa_C5DI   | ARR 3.0E-13 0 0  |
| 1319 | BZEMUCCO3 + NPHEO2 -> BZMUa_NPHa     | ARR 3.74E-11 0 0 |
| 1320 | BZEMUCCO3 + PHENO2 -> BZMUa_PHEN     | ARR 3.0E-13 0 0  |
| 1321 | BZEMUCCO3 + MALDIALCO3 -> BZMUa_MALa | ARR 3.0E-13 0 0  |
| 1322 | BZEMUCCO3 + EPXDLCO3 -> BZMUa_EPX    | ARR 3.0E-13 0 0  |
| 1323 | BZEMUCCO3 + C3DIALO2 -> BZMUa_C3DI   | ARR 3.0E-13 0 0  |
| 1324 | BZEMUCCO3 + MALDIALO2 -> BZMUa_MALb  | ARR 3.0E-13 0 0  |
| 1325 | BZEMUCCO3 + C6H5O2 -> BZMUa_C6a      | ARR 3.0E-13 0 0  |
| 1326 | BZEMUCCO3 + NBZFUO2 -> BZMUa_NBZa    | ARR 1.16E-12 0 0 |
| 1327 | BZEMUCCO3 + BZFUO2 -> BZMUa_BZFU     | ARR 3.0E-13 0 0  |
| 1328 | BZEMUCCO3 + HCOCO3 -> BZMUa_C3a      | ARR 3.0E-13 0 0  |
| 1329 | BZEMUCCO3 + CATEC1O2 -> BZMUa_CATE   | ARR 3.0E-13 0 0  |
| 1330 | BZEMUCCO3 + HCOCO3 -> BZMUa_C2a      | ARR 3.0E-13 0 0  |
| 1331 | BZEMUCCO3 + HCOCH2O2 -> BZMUa_C2b    | ARR 3.0E-13 0 0  |
| 1332 | BZEMUCCO3 + NPHEN1O2 -> BZMUa_NPHb   | ARR 3.0E-13 0 0  |
| 1333 | BZEMUCCO3 + NNCATECO2 -> BZMUa_NNC   | ARR 9.0E-11 0 0  |
| 1334 | BZEMUCCO3 + NCATECO2 -> BZMUa_NCAT   | ARR 5.12E-11 0 0 |
| 1335 | BZEMUCCO3 + NBZQO2 -> BZMUa_NBZb     | ARR 2.19E-11 0 0 |
| 1336 | BZEMUCCO3 + PBZQO2 -> BZMUa_PBZ      | ARR 3.0E-13 0 0  |
| 1337 | BZEMUCCO3 + MALANHYO2 -> BZMUa_MALc  | ARR 3.0E-13 0 0  |
| 1338 | BZEMUCCO3 + NDNPHENO2 -> BZMUa_NDN   | ARR 1.0E-10 0 0  |
| 1339 | BZEMUCCO3 + DNPHEO2 -> BZMUa_DNP     | ARR 7.62E-11 0 0 |
| 1340 | BZEMUCCO3 + HOCH2CO3 -> BZMUa_C2c    | ARR 3.0E-13 0 0  |
| 1341 | BZEMUCCO3 + C5CO2OHCO3 -> BZMUa_C5a  | ARR 3.0E-13 0 0  |
| 1342 | BZEMUCCO3 + C4CO2DBC03 -> BZMUa_C4a  | ARR 3.0E-13 0 0  |
| 1343 | BZEMUCO2 + BZEMUCO2 -> BZMUb_BZMUb   | ARR 1.41E-11 0 0 |
| 1344 | BZEMUCO2 + C5DIALO2 -> BZMUb_C5DI    | ARR 3.0E-13 0 0  |
| 1345 | BZEMUCO2 + NPHEO2 -> BZMUb_NPHa      | ARR 5.29E-11 0 0 |
| 1346 | BZEMUCO2 + PHENO2 -> BZMUb_PHEN      | ARR 1.41E-11 0 0 |
| 1347 | BZEMUCO2 + MALDIALCO3 -> BZMUb_MALa  | ARR 3.0E-13 0 0  |

|      |                                     |                  |
|------|-------------------------------------|------------------|
| 1348 | BZEMUCO2 + EPXDLCO3 -> BZMUb_EPX    | ARR 3.0E-13 0 0  |
| 1349 | BZEMUCO2 + C3DIALO2 -> BZMUb_C3DI   | ARR 3.0E-13 0 0  |
| 1350 | BZEMUCO2 + MALDIALO2 -> BZMUb_MALb  | ARR 3.0E-13 0 0  |
| 1351 | BZEMUCO2 + C6H5O2 -> BZMUb_C6a      | ARR 3.0E-13 0 0  |
| 1352 | BZEMUCO2 + NBZFUO2 -> BZMUb_NBZa    | ARR 1.67E-11 0 0 |
| 1353 | BZEMUCO2 + BZFUO2 -> BZMUb_BZFU     | ARR 3.0E-13 0 0  |
| 1354 | BZEMUCO2 + HCOCOHCOC3 -> BZMUb_C3a  | ARR 3.0E-13 0 0  |
| 1355 | BZEMUCO2 + CATEC1O2 -> BZMUb_CATE   | ARR 3.0E-13 0 0  |
| 1356 | BZEMUCO2 + HCOCO3 -> BZMUb_C2a      | ARR 3.0E-13 0 0  |
| 1357 | BZEMUCO2 + HCOCH2O2 -> BZMUb_C2b    | ARR 3.0E-13 0 0  |
| 1358 | BZEMUCO2 + NPHEN1O2 -> BZMUb_NPHb   | ARR 3.0E-13 0 0  |
| 1359 | BZEMUCO2 + NNCATECO2 -> BZMUb_NNC   | ARR 1.0E-10 0 0  |
| 1360 | BZEMUCO2 + NCATECO2 -> BZMUb_NCAT   | ARR 6.67E-11 0 0 |
| 1361 | BZEMUCO2 + NBZQO2 -> BZMUb_NBZb     | ARR 3.74E-11 0 0 |
| 1362 | BZEMUCO2 + PBZQO2 -> BZMUb_PBZ      | ARR 3.0E-13 0 0  |
| 1363 | BZEMUCO2 + MALANHYO2 -> BZMUb_MALc  | ARR 3.0E-13 0 0  |
| 1364 | BZEMUCO2 + NDNPHENO2 -> BZMUb_NDN   | ARR 1.0E-10 0 0  |
| 1365 | BZEMUCO2 + DNPHEO2 -> BZMUb_DNP     | ARR 9.17E-11 0 0 |
| 1366 | BZEMUCO2 + HOCH2CO3 -> BZMUb_C2c    | ARR 3.0E-13 0 0  |
| 1367 | BZEMUCO2 + C5CO2OHCOC3 -> BZMUb_C5a | ARR 1.24E-11 0 0 |
| 1368 | BZEMUCO2 + C4CO2DBCOC3 -> BZMUb_C4a | ARR 3.0E-13 0 0  |
| 1369 | C5DIALO2 + C5DIALO2 -> C5DI_C5DI    | ARR 3.0E-13 0 0  |
| 1370 | C5DIALO2 + NPHEO2 -> C5DI_NPHa      | ARR 1.32E-11 0 0 |
| 1371 | C5DIALO2 + PHENO2 -> C5DI_PHEN      | ARR 3.0E-13 0 0  |
| 1372 | C5DIALO2 + MALDIALCO3 -> C5DI_MALa  | ARR 3.0E-13 0 0  |
| 1373 | C5DIALO2 + EPXDLCO3 -> C5DI_EPX     | ARR 3.0E-13 0 0  |
| 1374 | C5DIALO2 + C3DIALO2 -> C5DI_C3DI    | ARR 3.0E-13 0 0  |
| 1375 | C5DIALO2 + MALDIALO2 -> C5DI_MALb   | ARR 3.0E-13 0 0  |
| 1376 | C5DIALO2 + C6H5O2 -> C5DI_C6a       | ARR 3.0E-13 0 0  |
| 1377 | C5DIALO2 + NBZFUO2 -> C5DI_NBZa     | ARR 3.0E-13 0 0  |
| 1378 | C5DIALO2 + BZFUO2 -> C5DI_BZFU      | ARR 3.0E-13 0 0  |
| 1379 | C5DIALO2 + HCOCOHCOC3 -> C5DI_C3a   | ARR 3.0E-13 0 0  |
| 1380 | C5DIALO2 + CATEC1O2 -> C5DI_CATE    | ARR 3.0E-13 0 0  |
| 1381 | C5DIALO2 + HCOCO3 -> C5DI_C2a       | ARR 3.0E-13 0 0  |
| 1382 | C5DIALO2 + HCOCH2O2 -> C5DI_C2b     | ARR 3.0E-13 0 0  |
| 1383 | C5DIALO2 + NPHEN1O2 -> C5DI_NPHb    | ARR 3.0E-13 0 0  |
| 1384 | C5DIALO2 + NNCATECO2 -> C5DI_NNC    | ARR 6.58E-11 0 0 |
| 1385 | C5DIALO2 + NCATECO2 -> C5DI_NCAT    | ARR 2.7E-11 0 0  |
| 1386 | C5DIALO2 + NBZQO2 -> C5DI_NBZb      | ARR 3.0E-13 0 0  |
| 1387 | C5DIALO2 + PBZQO2 -> C5DI_PBZ       | ARR 3.0E-13 0 0  |
| 1388 | C5DIALO2 + MALANHYO2 -> C5DI_MALc   | ARR 3.0E-13 0 0  |
| 1389 | C5DIALO2 + NDNPHENO2 -> C5DI_NDN    | ARR 9.08E-11 0 0 |
| 1390 | C5DIALO2 + DNPHEO2 -> C5DI_DNP      | ARR 5.2E-11 0 0  |
| 1391 | C5DIALO2 + HOCH2CO3 -> C5DI_C2c     | ARR 3.0E-13 0 0  |
| 1392 | C5DIALO2 + C5CO2OHCOC3 -> C5DI_C5a  | ARR 3.0E-13 0 0  |
| 1393 | C5DIALO2 + C4CO2DBCOC3 -> C5DI_C4a  | ARR 3.0E-13 0 0  |

|      |                                   |                  |
|------|-----------------------------------|------------------|
| 1394 | NPHENO2 + NPHENO2 -> NPHa_NPHa    | ARR 9.17E-11 0 0 |
| 1395 | NPHENO2 + PHENO2 -> NPHa_PHEN     | ARR 5.29E-11 0 0 |
| 1396 | NPHENO2 + MALDIALCO3 -> NPHa_MALa | ARR 1.16E-12 0 0 |
| 1397 | NPHENO2 + EPXDLCO3 -> NPHa_EPX    | ARR 1.5E-11 0 0  |
| 1398 | NPHENO2 + C3DIALO2 -> NPHa_C3DI   | ARR 3.0E-13 0 0  |
| 1399 | NPHENO2 + MALDIALO2 -> NPHa_MALb  | ARR 1.67E-11 0 0 |
| 1400 | NPHENO2 + C6H5O2 -> NPHa_C6a      | ARR 3.0E-13 0 0  |
| 1401 | NPHENO2 + NBZFUO2 -> NPHa_NBZa    | ARR 5.55E-11 0 0 |
| 1402 | NPHENO2 + BZFUO2 -> NPHa_BZFU     | ARR 1.67E-11 0 0 |
| 1403 | NPHENO2 + HCOCOHCOC3 -> NPHa_C3a  | ARR 4.61E-12 0 0 |
| 1404 | NPHENO2 + CATEC1O2 -> NPHa_CATE   | ARR 9.78E-12 0 0 |
| 1405 | NPHENO2 + HCOCO3 -> NPHa_C2a      | ARR 3.0E-13 0 0  |
| 1406 | NPHENO2 + HCOCH2O2 -> NPHa_C2b    | ARR 3.0E-13 0 0  |
| 1407 | NPHENO2 + NPHEN1O2 -> NPHa_NPHb   | ARR 3.48E-11 0 0 |
| 1408 | NPHENO2 + NNCATECO2 -> NPHa_NNC   | ARR 1.0E-10 0 0  |
| 1409 | NPHENO2 + NCATECO2 -> NPHa_NCAT   | ARR 1.0E-10 0 0  |
| 1410 | NPHENO2 + NBZQO2 -> NPHa_NBZb     | ARR 7.62E-11 0 0 |
| 1411 | NPHENO2 + PBZQO2 -> NPHa_PBZ      | ARR 3.74E-11 0 0 |
| 1412 | NPHENO2 + MALANHYO2 -> NPHa_MALc  | ARR 2.87E-11 0 0 |
| 1413 | NPHENO2 + NDNPHENO2 -> NPHa_NDN   | ARR 1.0E-10 0 0  |
| 1414 | NPHENO2 + DNPHEO2 -> NPHa_DNP     | ARR 1.0E-10 0 0  |
| 1415 | NPHENO2 + HOCH2CO3 -> NPHa_C2c    | ARR 3.0E-13 0 0  |
| 1416 | NPHENO2 + C5CO2OHCOC3 -> NPHa_C5a | ARR 5.12E-11 0 0 |
| 1417 | NPHENO2 + C4CO2DBCOC3 -> NPHa_C4a | ARR 2.53E-11 0 0 |
| 1418 | PHENO2 + PHENO2 -> PHEN_PHEN      | ARR 1.41E-11 0 0 |
| 1419 | PHENO2 + MALDIALCO3 -> PHEN_MALa  | ARR 3.0E-13 0 0  |
| 1420 | PHENO2 + EPXDLCO3 -> PHEN_EPX     | ARR 3.0E-13 0 0  |
| 1421 | PHENO2 + C3DIALO2 -> PHEN_C3DI    | ARR 3.0E-13 0 0  |
| 1422 | PHENO2 + MALDIALO2 -> PHEN_MALb   | ARR 3.0E-13 0 0  |
| 1423 | PHENO2 + C6H5O2 -> PHEN_C6a       | ARR 3.0E-13 0 0  |
| 1424 | PHENO2 + NBZFUO2 -> PHEN_NBZa     | ARR 1.67E-11 0 0 |
| 1425 | PHENO2 + BZFUO2 -> PHEN_BZFU      | ARR 3.0E-13 0 0  |
| 1426 | PHENO2 + HCOCOHCOC3 -> PHEN_C3a   | ARR 3.0E-13 0 0  |
| 1427 | PHENO2 + CATEC1O2 -> PHEN_CATE    | ARR 3.0E-13 0 0  |
| 1428 | PHENO2 + HCOCO3 -> PHEN_C2a       | ARR 3.0E-13 0 0  |
| 1429 | PHENO2 + HCOCH2O2 -> PHEN_C2b     | ARR 3.0E-13 0 0  |
| 1430 | PHENO2 + NPHEN1O2 -> PHEN_NPHb    | ARR 3.0E-13 0 0  |
| 1431 | PHENO2 + NNCATECO2 -> PHEN_NNC    | ARR 1.0E-10 0 0  |
| 1432 | PHENO2 + NCATECO2 -> PHEN_NCAT    | ARR 6.67E-11 0 0 |
| 1433 | PHENO2 + NBZQO2 -> PHEN_NBZb      | ARR 3.74E-11 0 0 |
| 1434 | PHENO2 + PBZQO2 -> PHEN_PBZ       | ARR 3.0E-13 0 0  |
| 1435 | PHENO2 + MALANHYO2 -> PHEN_MALc   | ARR 3.0E-13 0 0  |
| 1436 | PHENO2 + NDNPHENO2 -> PHEN_NDN    | ARR 1.0E-10 0 0  |
| 1437 | PHENO2 + DNPHEO2 -> PHEN_DNP      | ARR 9.17E-11 0 0 |
| 1438 | PHENO2 + HOCH2CO3 -> PHEN_C2c     | ARR 3.0E-13 0 0  |
| 1439 | PHENO2 + C5CO2OHCOC3 -> PHEN_C5a  | ARR 1.24E-11 0 0 |

|      |                                      |                  |
|------|--------------------------------------|------------------|
| 1440 | PHENO2 + C4CO2DBC03 -> PHEN_C4a      | ARR 3.0E-13 0 0  |
| 1441 | MALDIALCO3 + MALDIALCO3 -> MALa_MALa | ARR 3.0E-13 0 0  |
| 1442 | MALDIALCO3 + EPXDLC03 -> MALa_EPX    | ARR 3.0E-13 0 0  |
| 1443 | MALDIALCO3 + C3DIALO2 -> MALa_C3DI   | ARR 3.0E-13 0 0  |
| 1444 | MALDIALCO3 + MALDIALO2 -> MALa_MALb  | ARR 3.0E-13 0 0  |
| 1445 | MALDIALCO3 + C6H5O2 -> MALa_C6a      | ARR 3.0E-13 0 0  |
| 1446 | MALDIALCO3 + NBZFUO2 -> MALa_NBZa    | ARR 3.0E-13 0 0  |
| 1447 | MALDIALCO3 + BZFUO2 -> MALa_BZFU     | ARR 3.0E-13 0 0  |
| 1448 | MALDIALCO3 + HCOCOHC03 -> MALa_C3a   | ARR 3.0E-13 0 0  |
| 1449 | MALDIALCO3 + CATEC1O2 -> MALa_CATE   | ARR 3.0E-13 0 0  |
| 1450 | MALDIALCO3 + HCOCO3 -> MALa_C2a      | ARR 3.0E-13 0 0  |
| 1451 | MALDIALCO3 + HCOCH2O2 -> MALa_C2b    | ARR 3.0E-13 0 0  |
| 1452 | MALDIALCO3 + NPHEN1O2 -> MALa_NPHb   | ARR 3.0E-13 0 0  |
| 1453 | MALDIALCO3 + NNCATECO2 -> MALa_NNC   | ARR 5.37E-11 0 0 |
| 1454 | MALDIALCO3 + NCATECO2 -> MALa_NCAT   | ARR 1.5E-11 0 0  |
| 1455 | MALDIALCO3 + NBZQO2 -> MALa_NBZb     | ARR 3.0E-13 0 0  |
| 1456 | MALDIALCO3 + PBZQO2 -> MALa_PBZ      | ARR 3.0E-13 0 0  |
| 1457 | MALDIALCO3 + MALANHYO2 -> MALa_MALc  | ARR 3.0E-13 0 0  |
| 1458 | MALDIALCO3 + NDNPHENO2 -> MALa_NDN   | ARR 7.87E-11 0 0 |
| 1459 | MALDIALCO3 + DNPHEO2 -> MALa_DNP     | ARR 4.0E-11 0 0  |
| 1460 | MALDIALCO3 + HOCH2CO3 -> MALa_C2c    | ARR 3.0E-13 0 0  |
| 1461 | MALDIALCO3 + C5CO2OHC03 -> MALa_C5a  | ARR 3.0E-13 0 0  |
| 1462 | MALDIALCO3 + C4CO2DBC03 -> MALa_C4a  | ARR 3.0E-13 0 0  |
| 1463 | EPXDLC03 + EPXDLC03 -> EPX_EPX       | ARR 3.0E-13 0 0  |
| 1464 | EPXDLC03 + C3DIALO2 -> EPX_C3DI      | ARR 3.0E-13 0 0  |
| 1465 | EPXDLC03 + MALDIALO2 -> EPX_MALb     | ARR 3.0E-13 0 0  |
| 1466 | EPXDLC03 + C6H5O2 -> EPX_C6a         | ARR 3.0E-13 0 0  |
| 1467 | EPXDLC03 + NBZFUO2 -> EPX_NBZa       | ARR 3.0E-13 0 0  |
| 1468 | EPXDLC03 + BZFUO2 -> EPX_BZFU        | ARR 3.0E-13 0 0  |
| 1469 | EPXDLC03 + HCOCOHC03 -> EPX_C3a      | ARR 3.0E-13 0 0  |
| 1470 | EPXDLC03 + CATEC1O2 -> EPX_CATE      | ARR 3.0E-13 0 0  |
| 1471 | EPXDLC03 + HCOCO3 -> EPX_C2a         | ARR 3.0E-13 0 0  |
| 1472 | EPXDLC03 + HCOCH2O2 -> EPX_C2b       | ARR 3.0E-13 0 0  |
| 1473 | EPXDLC03 + NPHEN1O2 -> EPX_NPHb      | ARR 3.0E-13 0 0  |
| 1474 | EPXDLC03 + NNCATECO2 -> EPX_NNC      | ARR 6.75E-11 0 0 |
| 1475 | EPXDLC03 + NCATECO2 -> EPX_NCAT      | ARR 2.87E-11 0 0 |
| 1476 | EPXDLC03 + NBZQO2 -> EPX_NBZb        | ARR 3.0E-13 0 0  |
| 1477 | EPXDLC03 + PBZQO2 -> EPX_PBZ         | ARR 3.0E-13 0 0  |
| 1478 | EPXDLC03 + MALANHYO2 -> EPX_MALc     | ARR 3.0E-13 0 0  |
| 1479 | EPXDLC03 + NDNPHENO2 -> EPX_NDN      | ARR 9.25E-11 0 0 |
| 1480 | EPXDLC03 + DNPHEO2 -> EPX_DNP        | ARR 5.37E-11 0 0 |
| 1481 | EPXDLC03 + HOCH2CO3 -> EPX_C2c       | ARR 3.0E-13 0 0  |
| 1482 | EPXDLC03 + C5CO2OHC03 -> EPX_C5a     | ARR 3.0E-13 0 0  |
| 1483 | EPXDLC03 + C4CO2DBC03 -> EPX_C4a     | ARR 3.0E-13 0 0  |
| 1484 | C3DIALO2 + C3DIALO2 -> C3DI_C3DI     | ARR 3.0E-13 0 0  |
| 1485 | C3DIALO2 + MALDIALO2 -> C3DI_MALb    | ARR 3.0E-13 0 0  |

|      |                                    |                  |
|------|------------------------------------|------------------|
| 1486 | C3DIALO2 + C6H5O2 -> C3DI_C6a      | ARR 3.0E-13 0 0  |
| 1487 | C3DIALO2 + NBZFUO2 -> C3DI_NBZa    | ARR 3.0E-13 0 0  |
| 1488 | C3DIALO2 + BZFUO2 -> C3DI_BZFU     | ARR 3.0E-13 0 0  |
| 1489 | C3DIALO2 + HCOCOHCO3 -> C3DI_C3a   | ARR 3.0E-13 0 0  |
| 1490 | C3DIALO2 + CATEC1O2 -> C3DI_CATE   | ARR 3.0E-13 0 0  |
| 1491 | C3DIALO2 + HCOCO3 -> C3DI_C2a      | ARR 3.0E-13 0 0  |
| 1492 | C3DIALO2 + HCOCH2O2 -> C3DI_C2b    | ARR 3.0E-13 0 0  |
| 1493 | C3DIALO2 + NPHEN1O2 -> C3DI_NPHb   | ARR 3.0E-13 0 0  |
| 1494 | C3DIALO2 + NNCATECO2 -> C3DI_NNC   | ARR 4.34E-11 0 0 |
| 1495 | C3DIALO2 + NCATECO2 -> C3DI_NCAT   | ARR 4.61E-12 0 0 |
| 1496 | C3DIALO2 + NBZQO2 -> C3DI_NBZb     | ARR 3.0E-13 0 0  |
| 1497 | C3DIALO2 + PBZQO2 -> C3DI_PBZ      | ARR 3.0E-13 0 0  |
| 1498 | C3DIALO2 + MALANHYO2 -> C3DI_MALc  | ARR 3.0E-13 0 0  |
| 1499 | C3DIALO2 + NDNPHENO2 -> C3DI_NDN   | ARR 6.84E-11 0 0 |
| 1500 | C3DIALO2 + DNPHEO2 -> C3DI_DNP     | ARR 2.96E-11 0 0 |
| 1501 | C3DIALO2 + HOCH2CO3 -> C3DI_C2c    | ARR 3.0E-13 0 0  |
| 1502 | C3DIALO2 + C5CO2OHCO3 -> C3DI_C5a  | ARR 3.0E-13 0 0  |
| 1503 | C3DIALO2 + C4CO2DBC03 -> C3DI_C4a  | ARR 3.0E-13 0 0  |
| 1504 | MALDIALO2 + MALDIALO2 -> MALb_MALb | ARR 3.0E-13 0 0  |
| 1505 | MALDIALO2 + C6H5O2 -> MALb_C6a     | ARR 3.0E-13 0 0  |
| 1506 | MALDIALO2 + NBZFUO2 -> MALb_NBZa   | ARR 3.0E-13 0 0  |
| 1507 | MALDIALO2 + BZFUO2 -> MALb_BZFU    | ARR 3.0E-13 0 0  |
| 1508 | MALDIALO2 + HCOCOHCO3 -> MALb_C3a  | ARR 3.0E-13 0 0  |
| 1509 | MALDIALO2 + CATEC1O2 -> MALb_CATE  | ARR 3.0E-13 0 0  |
| 1510 | MALDIALO2 + HCOCO3 -> MALb_C2a     | ARR 3.0E-13 0 0  |
| 1511 | MALDIALO2 + HCOCH2O2 -> MALb_C2b   | ARR 3.0E-13 0 0  |
| 1512 | MALDIALO2 + NPHEN1O2 -> MALb_NPHb  | ARR 3.0E-13 0 0  |
| 1513 | MALDIALO2 + NNCATECO2 -> MALb_NNC  | ARR 6.93E-11 0 0 |
| 1514 | MALDIALO2 + NCATECO2 -> MALb_NCAT  | ARR 3.05E-11 0 0 |
| 1515 | MALDIALO2 + NBZQO2 -> MALb_NBZb    | ARR 1.16E-12 0 0 |
| 1516 | MALDIALO2 + PBZQO2 -> MALb_PBZ     | ARR 3.0E-13 0 0  |
| 1517 | MALDIALO2 + MALANHYO2 -> MALb_MALc | ARR 3.0E-13 0 0  |
| 1518 | MALDIALO2 + NDNPHENO2 -> MALb_NDN  | ARR 9.43E-11 0 0 |
| 1519 | MALDIALO2 + DNPHEO2 -> MALb_DNP    | ARR 5.55E-11 0 0 |
| 1520 | MALDIALO2 + HOCH2CO3 -> MALb_C2c   | ARR 3.0E-13 0 0  |
| 1521 | MALDIALO2 + C5CO2OHCO3 -> MALb_C5a | ARR 3.0E-13 0 0  |
| 1522 | MALDIALO2 + C4CO2DBC03 -> MALb_C4a | ARR 3.0E-13 0 0  |
| 1523 | C6H5O2 + C6H5O2 -> C6a_C6a         | ARR 3.0E-13 0 0  |
| 1524 | C6H5O2 + NBZFUO2 -> C6a_NBZa       | ARR 3.0E-13 0 0  |
| 1525 | C6H5O2 + BZFUO2 -> C6a_BZFU        | ARR 3.0E-13 0 0  |
| 1526 | C6H5O2 + HCOCOHCO3 -> C6a_C3a      | ARR 3.0E-13 0 0  |
| 1527 | C6H5O2 + CATEC1O2 -> C6a_CATE      | ARR 3.0E-13 0 0  |
| 1528 | C6H5O2 + HCOCO3 -> C6a_C2a         | ARR 3.0E-13 0 0  |
| 1529 | C6H5O2 + HCOCH2O2 -> C6a_C2b       | ARR 3.0E-13 0 0  |
| 1530 | C6H5O2 + NPHEN1O2 -> C6a_NPHb      | ARR 3.0E-13 0 0  |
| 1531 | C6H5O2 + NNCATECO2 -> C6a_NNC      | ARR 4.86E-11 0 0 |

|      |                                  |                  |
|------|----------------------------------|------------------|
| 1532 | C6H5O2 + NCATECO2 -> C6a_NCAT    | ARR 9.78E-12 0 0 |
| 1533 | C6H5O2 + NBZQO2 -> C6a_NBZb      | ARR 3.0E-13 0 0  |
| 1534 | C6H5O2 + PBZQO2 -> C6a_PBZ       | ARR 3.0E-13 0 0  |
| 1535 | C6H5O2 + MALANHYO2 -> C6a_MALc   | ARR 3.0E-13 0 0  |
| 1536 | C6H5O2 + NDNPHENO2 -> C6a_NDN    | ARR 7.36E-11 0 0 |
| 1537 | C6H5O2 + DNPHEO2 -> C6a_DNP      | ARR 3.48E-11 0 0 |
| 1538 | C6H5O2 + HOCH2CO3 -> C6a_C2c     | ARR 3.0E-13 0 0  |
| 1539 | C6H5O2 + C5CO2OHC03 -> C6a_C5a   | ARR 3.0E-13 0 0  |
| 1540 | C6H5O2 + C4CO2DBC03 -> C6a_C4a   | ARR 3.0E-13 0 0  |
| 1541 | NBZFUO2 + NBZFUO2 -> NBZa_NBZa   | ARR 1.93E-11 0 0 |
| 1542 | NBZFUO2 + BZFUO2 -> NBZa_BZFU    | ARR 3.0E-13 0 0  |
| 1543 | NBZFUO2 + HCOCOHC03 -> NBZa_C3a  | ARR 3.0E-13 0 0  |
| 1544 | NBZFUO2 + CATEC1O2 -> NBZa_CATE  | ARR 3.0E-13 0 0  |
| 1545 | NBZFUO2 + HCOCO3 -> NBZa_C2a     | ARR 3.0E-13 0 0  |
| 1546 | NBZFUO2 + HCOCH2O2 -> NBZa_C2b   | ARR 3.0E-13 0 0  |
| 1547 | NBZFUO2 + NPHEO2 -> NBZa_NPHb    | ARR 3.0E-13 0 0  |
| 1548 | NBZFUO2 + NNCATECO2 -> NBZa_NNC  | ARR 1.0E-10 0 0  |
| 1549 | NBZFUO2 + NCATECO2 -> NBZa_NCAT  | ARR 6.93E-11 0 0 |
| 1550 | NBZFUO2 + NBZQO2 -> NBZa_NBZb    | ARR 4.0E-11 0 0  |
| 1551 | NBZFUO2 + PBZQO2 -> NBZa_PBZ     | ARR 1.16E-12 0 0 |
| 1552 | NBZFUO2 + MALANHYO2 -> NBZa_MALc | ARR 3.0E-13 0 0  |
| 1553 | NBZFUO2 + NDNPHENO2 -> NBZa_NDN  | ARR 1.0E-10 0 0  |
| 1554 | NBZFUO2 + DNPHEO2 -> NBZa_DNP    | ARR 9.43E-11 0 0 |
| 1555 | NBZFUO2 + HOCH2CO3 -> NBZa_C2c   | ARR 3.0E-13 0 0  |
| 1556 | NBZFUO2 + C5CO2OHC03 -> NBZa_C5a | ARR 1.5E-11 0 0  |
| 1557 | NBZFUO2 + C4CO2DBC03 -> NBZa_C4a | ARR 3.0E-13 0 0  |
| 1558 | BZFUO2 + BZFUO2 -> BZFU_BZFU     | ARR 3.0E-13 0 0  |
| 1559 | BZFUO2 + HCOCOHC03 -> BZFU_C3a   | ARR 3.0E-13 0 0  |
| 1560 | BZFUO2 + CATEC1O2 -> BZFU_CATE   | ARR 3.0E-13 0 0  |
| 1561 | BZFUO2 + HCOCO3 -> BZFU_C2a      | ARR 3.0E-13 0 0  |
| 1562 | BZFUO2 + HCOCH2O2 -> BZFU_C2b    | ARR 3.0E-13 0 0  |
| 1563 | BZFUO2 + NPHEO2 -> BZFU_NPHb     | ARR 3.0E-13 0 0  |
| 1564 | BZFUO2 + NNCATECO2 -> BZFU_NNC   | ARR 6.93E-11 0 0 |
| 1565 | BZFUO2 + NCATECO2 -> BZFU_NCAT   | ARR 3.05E-11 0 0 |
| 1566 | BZFUO2 + NBZQO2 -> BZFU_NBZb     | ARR 1.16E-12 0 0 |
| 1567 | BZFUO2 + PBZQO2 -> BZFU_PBZ      | ARR 3.0E-13 0 0  |
| 1568 | BZFUO2 + MALANHYO2 -> BZFU_MALc  | ARR 3.0E-13 0 0  |
| 1569 | BZFUO2 + NDNPHENO2 -> BZFU_NDN   | ARR 9.43E-11 0 0 |
| 1570 | BZFUO2 + DNPHEO2 -> BZFU_DNP     | ARR 5.55E-11 0 0 |
| 1571 | BZFUO2 + HOCH2CO3 -> BZFU_C2c    | ARR 3.0E-13 0 0  |
| 1572 | BZFUO2 + C5CO2OHC03 -> BZFU_C5a  | ARR 3.0E-13 0 0  |
| 1573 | BZFUO2 + C4CO2DBC03 -> BZFU_C4a  | ARR 3.0E-13 0 0  |
| 1574 | HCOCOHC03 + HCOCOHC03 -> C3a_C3a | ARR 3.0E-13 0 0  |
| 1575 | HCOCOHC03 + CATEC1O2 -> C3a_CATE | ARR 3.0E-13 0 0  |
| 1576 | HCOCOHC03 + HCOCO3 -> C3a_C2a    | ARR 3.0E-13 0 0  |
| 1577 | HCOCOHC03 + HCOCH2O2 -> C3a_C2b  | ARR 3.0E-13 0 0  |

|      |                                    |                  |
|------|------------------------------------|------------------|
| 1578 | HCOCOHCO3 + NPHEN1O2 -> C3a_NPHb   | ARR 3.0E-13 0 0  |
| 1579 | HCOCOHCO3 + NNCATECO2 -> C3a_NNC   | ARR 5.72E-11 0 0 |
| 1580 | HCOCOHCO3 + NCATECO2 -> C3a_NCAT   | ARR 1.84E-11 0 0 |
| 1581 | HCOCOHCO3 + NBZQO2 -> C3a_NBZb     | ARR 3.0E-13 0 0  |
| 1582 | HCOCOHCO3 + PBZQO2 -> C3a_PBZ      | ARR 3.0E-13 0 0  |
| 1583 | HCOCOHCO3 + MALANHYO2 -> C3a_MALc  | ARR 3.0E-13 0 0  |
| 1584 | HCOCOHCO3 + NDNPHENO2 -> C3a_NDN   | ARR 8.22E-11 0 0 |
| 1585 | HCOCOHCO3 + DNPHEO2 -> C3a_DNP     | ARR 4.34E-11 0 0 |
| 1586 | HCOCOHCO3 + HOCH2CO3 -> C3a_C2c    | ARR 3.0E-13 0 0  |
| 1587 | HCOCOHCO3 + C5CO2OHCOC3 -> C3a_C5a | ARR 3.0E-13 0 0  |
| 1588 | HCOCOHCO3 + C4CO2DBCOC3 -> C3a_C4a | ARR 3.0E-13 0 0  |
| 1589 | CATEC1O2 + CATEC1O2 -> CATE_CATE   | ARR 3.0E-13 0 0  |
| 1590 | CATEC1O2 + HCOCO3 -> CATE_C2a      | ARR 3.0E-13 0 0  |
| 1591 | CATEC1O2 + HCOCH2O2 -> CATE_C2b    | ARR 3.0E-13 0 0  |
| 1592 | CATEC1O2 + NPHEN1O2 -> CATE_NPHb   | ARR 3.0E-13 0 0  |
| 1593 | CATEC1O2 + NNCATECO2 -> CATE_NNC   | ARR 6.24E-11 0 0 |
| 1594 | CATEC1O2 + NCATECO2 -> CATE_NCAT   | ARR 2.36E-11 0 0 |
| 1595 | CATEC1O2 + NBZQO2 -> CATE_NBZb     | ARR 3.0E-13 0 0  |
| 1596 | CATEC1O2 + PBZQO2 -> CATE_PBZ      | ARR 3.0E-13 0 0  |
| 1597 | CATEC1O2 + MALANHYO2 -> CATE_MALc  | ARR 3.0E-13 0 0  |
| 1598 | CATEC1O2 + NDNPHENO2 -> CATE_NDN   | ARR 8.74E-11 0 0 |
| 1599 | CATEC1O2 + DNPHEO2 -> CATE_DNP     | ARR 4.86E-11 0 0 |
| 1600 | CATEC1O2 + HOCH2CO3 -> CATE_C2c    | ARR 3.0E-13 0 0  |
| 1601 | CATEC1O2 + C5CO2OHCOC3 -> CATE_C5a | ARR 3.0E-13 0 0  |
| 1602 | CATEC1O2 + C4CO2DBCOC3 -> CATE_C4a | ARR 3.0E-13 0 0  |
| 1603 | HCOCO3 + HCOCO3 -> C2a_C2a         | ARR 3.0E-13 0 0  |
| 1604 | HCOCO3 + HCOCH2O2 -> C2a_C2b       | ARR 3.0E-13 0 0  |
| 1605 | HCOCO3 + NPHEN1O2 -> C2a_NPHb      | ARR 3.0E-13 0 0  |
| 1606 | HCOCO3 + NNCATECO2 -> C2a_NNC      | ARR 3.13E-11 0 0 |
| 1607 | HCOCO3 + NCATECO2 -> C2a_NCAT      | ARR 3.0E-13 0 0  |
| 1608 | HCOCO3 + NBZQO2 -> C2a_NBZb        | ARR 3.0E-13 0 0  |
| 1609 | HCOCO3 + PBZQO2 -> C2a_PBZ         | ARR 3.0E-13 0 0  |
| 1610 | HCOCO3 + MALANHYO2 -> C2a_MALc     | ARR 3.0E-13 0 0  |
| 1611 | HCOCO3 + NDNPHENO2 -> C2a_NDN      | ARR 5.63E-11 0 0 |
| 1612 | HCOCO3 + DNPHEO2 -> C2a_DNP        | ARR 1.75E-11 0 0 |
| 1613 | HCOCO3 + HOCH2CO3 -> C2a_C2c       | ARR 3.0E-13 0 0  |
| 1614 | HCOCO3 + C5CO2OHCOC3 -> C2a_C5a    | ARR 3.0E-13 0 0  |
| 1615 | HCOCO3 + C4CO2DBCOC3 -> C2a_C4a    | ARR 3.0E-13 0 0  |
| 1616 | HCOCH2O2 + HCOCH2O2 -> C2b_C2b     | ARR 3.0E-13 0 0  |
| 1617 | HCOCH2O2 + NPHEN1O2 -> C2b_NPHb    | ARR 3.0E-13 0 0  |
| 1618 | HCOCH2O2 + NNCATECO2 -> C2b_NNC    | ARR 1.93E-11 0 0 |
| 1619 | HCOCH2O2 + NCATECO2 -> C2b_NCAT    | ARR 3.0E-13 0 0  |
| 1620 | HCOCH2O2 + NBZQO2 -> C2b_NBZb      | ARR 3.0E-13 0 0  |
| 1621 | HCOCH2O2 + PBZQO2 -> C2b_PBZ       | ARR 3.0E-13 0 0  |
| 1622 | HCOCH2O2 + MALANHYO2 -> C2b_MALc   | ARR 3.0E-13 0 0  |
| 1623 | HCOCH2O2 + NDNPHENO2 -> C2b_NDN    | ARR 4.43E-11 0 0 |

|      |                                   |                  |
|------|-----------------------------------|------------------|
| 1624 | HCOCH2O2 + DNPHEO2 -> C2b_DNP     | ARR 5.47E-12 0 0 |
| 1625 | HCOCH2O2 + HOCH2CO3 -> C2b_C2c    | ARR 3.0E-13 0 0  |
| 1626 | HCOCH2O2 + C5CO2OHC03 -> C2b_C5a  | ARR 3.0E-13 0 0  |
| 1627 | HCOCH2O2 + C4CO2DBC03 -> C2b_C4a  | ARR 3.0E-13 0 0  |
| 1628 | NPHEN1O2 + NPHEN1O2 -> NPHb_NPHb  | ARR 3.0E-13 0 0  |
| 1629 | NPHEN1O2 + NNCATECO2 -> NPHb_NNC  | ARR 8.74E-11 0 0 |
| 1630 | NPHEN1O2 + NCATECO2 -> NPHb_NCAT  | ARR 4.86E-11 0 0 |
| 1631 | NPHEN1O2 + NBZQO2 -> NPHb_NBZb    | ARR 1.93E-11 0 0 |
| 1632 | NPHEN1O2 + PBZQO2 -> NPHb_PBZ     | ARR 3.0E-13 0 0  |
| 1633 | NPHEN1O2 + MALANHYO2 -> NPHb_MALc | ARR 3.0E-13 0 0  |
| 1634 | NPHEN1O2 + NDNPHENO2 -> NPHb_NDN  | ARR 1.0E-10 0 0  |
| 1635 | NPHEN1O2 + DNPHEO2 -> NPHb_DNP    | ARR 7.36E-11 0 0 |
| 1636 | NPHEN1O2 + HOCH2CO3 -> NPHb_C2c   | ARR 3.0E-13 0 0  |
| 1637 | NPHEN1O2 + C5CO2OHC03 -> NPHb_C5a | ARR 3.0E-13 0 0  |
| 1638 | NPHEN1O2 + C4CO2DBC03 -> NPHb_C4a | ARR 3.0E-13 0 0  |
| 1639 | NNCATECO2 + NNCATECO2 -> NNC_NNC  | ARR 1.0E-10 0 0  |
| 1640 | NNCATECO2 + NCATECO2 -> NNC_NCAT  | ARR 1.0E-10 0 0  |
| 1641 | NNCATECO2 + NBZQO2 -> NNC_NBZb    | ARR 1.0E-10 0 0  |
| 1642 | NNCATECO2 + PBZQO2 -> NNC_PBZ     | ARR 9.0E-11 0 0  |
| 1643 | NNCATECO2 + MALANHYO2 -> NNC_MALc | ARR 8.13E-11 0 0 |
| 1644 | NNCATECO2 + NDNPHENO2 -> NNC_NDN  | ARR 1.0E-10 0 0  |
| 1645 | NNCATECO2 + DNPHEO2 -> NNC_DNP    | ARR 1.0E-10 0 0  |
| 1646 | NNCATECO2 + HOCH2CO3 -> NNC_C2c   | ARR 3.31E-11 0 0 |
| 1647 | NNCATECO2 + C5CO2OHC03 -> NNC_C5a | ARR 1.0E-10 0 0  |
| 1648 | NNCATECO2 + C4CO2DBC03 -> NNC_C4a | ARR 7.79E-11 0 0 |
| 1649 | NCATECO2 + NCATECO2 -> NCAT_NCAT  | ARR 1.0E-10 0 0  |
| 1650 | NCATECO2 + NBZQO2 -> NCAT_NBZb    | ARR 9.0E-11 0 0  |
| 1651 | NCATECO2 + PBZQO2 -> NCAT_PBZ     | ARR 5.12E-11 0 0 |
| 1652 | NCATECO2 + MALANHYO2 -> NCAT_MALc | ARR 4.25E-11 0 0 |
| 1653 | NCATECO2 + NDNPHENO2 -> NCAT_NDN  | ARR 1.0E-10 0 0  |
| 1654 | NCATECO2 + DNPHEO2 -> NCAT_DNP    | ARR 1.0E-10 0 0  |
| 1655 | NCATECO2 + HOCH2CO3 -> NCAT_C2c   | ARR 3.0E-13 0 0  |
| 1656 | NCATECO2 + C5CO2OHC03 -> NCAT_C5a | ARR 6.5E-11 0 0  |
| 1657 | NCATECO2 + C4CO2DBC03 -> NCAT_C4a | ARR 3.91E-11 0 0 |
| 1658 | NBZQO2 + NBZQO2 -> NBZb_NBZb      | ARR 6.06E-11 0 0 |
| 1659 | NBZQO2 + PBZQO2 -> NBZb_PBZ       | ARR 2.19E-11 0 0 |
| 1660 | NBZQO2 + MALANHYO2 -> NBZb_MALc   | ARR 1.32E-11 0 0 |
| 1661 | NBZQO2 + NDNPHENO2 -> NBZb_NDN    | ARR 1.0E-10 0 0  |
| 1662 | NBZQO2 + DNPHEO2 -> NBZb_DNP      | ARR 1.0E-10 0 0  |
| 1663 | NBZQO2 + HOCH2CO3 -> NBZb_C2c     | ARR 3.0E-13 0 0  |
| 1664 | NBZQO2 + C5CO2OHC03 -> NBZb_C5a   | ARR 3.56E-11 0 0 |
| 1665 | NBZQO2 + C4CO2DBC03 -> NBZb_C4a   | ARR 9.78E-12 0 0 |
| 1666 | PBZQO2 + PBZQO2 -> PBZ_PBZ        | ARR 3.0E-13 0 0  |
| 1667 | PBZQO2 + MALANHYO2 -> PBZ_MALc    | ARR 3.0E-13 0 0  |
| 1668 | PBZQO2 + NDNPHENO2 -> PBZ_NDN     | ARR 1.0E-10 0 0  |
| 1669 | PBZQO2 + DNPHEO2 -> PBZ_DNP       | ARR 7.62E-11 0 0 |

|      |                                    |                        |
|------|------------------------------------|------------------------|
| 1670 | PBZQO2 + HOCH2CO3 -> PBZ_C2c       | ARR 3.0E-13 0 0        |
| 1671 | PBZQO2 + C5CO2OHCO3 -> PBZ_C5a     | ARR 3.0E-13 0 0        |
| 1672 | PBZQO2 + C4CO2DBC03 -> PBZ_C4a     | ARR 3.0E-13 0 0        |
| 1673 | MALANHYO2 + MALANHYO2 -> MALc_MALc | ARR 3.0E-13 0 0        |
| 1674 | MALANHYO2 + NDNPHENO2 -> MALc_NDN  | ARR 1.0E-10 0 0        |
| 1675 | MALANHYO2 + DNPHEO2 -> MALc_DNP    | ARR 6.75E-11 0 0       |
| 1676 | MALANHYO2 + HOCH2CO3 -> MALc_C2c   | ARR 3.0E-13 0 0        |
| 1677 | MALANHYO2 + C5CO2OHCO3 -> MALc_C5a | ARR 3.0E-13 0 0        |
| 1678 | MALANHYO2 + C4CO2DBC03 -> MALc_C4a | ARR 3.0E-13 0 0        |
| 1679 | NDNPHENO2 + NDNPHENO2 -> NDN_NDN   | ARR 1.0E-10 0 0        |
| 1680 | NDNPHENO2 + DNPHEO2 -> NDN_DNP     | ARR 1.0E-10 0 0        |
| 1681 | NDNPHENO2 + HOCH2CO3 -> NDN_C2c    | ARR 5.81E-11 0 0       |
| 1682 | NDNPHENO2 + C5CO2OHCO3 -> NDN_C5a  | ARR 1.0E-10 0 0        |
| 1683 | NDNPHENO2 + C4CO2DBC03 -> NDN_C4a  | ARR 1.0E-10 0 0        |
| 1684 | DNPHEO2 + DNPHEO2 -> DNP_DNP       | ARR 1.0E-10 0 0        |
| 1685 | DNPHEO2 + HOCH2CO3 -> DNP_C2c      | ARR 1.93E-11 0 0       |
| 1686 | DNPHEO2 + C5CO2OHCO3 -> DNP_C5a    | ARR 9.0E-11 0 0        |
| 1687 | DNPHEO2 + C4CO2DBC03 -> DNP_C4a    | ARR 6.41E-11 0 0       |
| 1688 | HOCH2CO3 + HOCH2CO3 -> C2c_C2c     | ARR 3.0E-13 0 0        |
| 1689 | HOCH2CO3 + C5CO2OHCO3 -> C2c_C5a   | ARR 3.0E-13 0 0        |
| 1690 | HOCH2CO3 + C4CO2DBC03 -> C2c_C4a   | ARR 3.0E-13 0 0        |
| 1691 | C5CO2OHCO3 + C5CO2OHCO3 -> C5a_C5a | ARR 1.06E-11 0 0       |
| 1692 | C5CO2OHCO3 + C4CO2DBC03 -> C5a_C4a | ARR 3.0E-13 0 0        |
| 1693 | C4CO2DBC03 + C4CO2DBC03 -> C4a_C4a | ARR 3.0E-13 0 0        |
| 1694 | BZo_RO2_O7 -> BZo_O4_2OH           | RO2 1 ARR 0.22E-11 0 0 |
| 1695 | BZo_RO2_O9 -> BZo_O6_2OH           | RO2 1 ARR 0.45E-11 0 0 |
| 1696 | BZo_RO2_O11 -> BZo_O8_2OH          | RO2 1 ARR 0.68E-11 0 0 |
| 1697 | BZeo_RO2_O6 -> BZeo_O3_2OH         | RO2 1 ARR 0.1E-11 0 0  |
| 1698 | BZeo_RO2_O8 -> BZeo_O5_2OH         | RO2 1 ARR 0.34E-11 0 0 |
| 1699 | BZeo_RO2_O10 -> BZeo_O7_2OH        | RO2 1 ARR 0.57E-11 0 0 |
| 1700 | C5_RO2_O6 -> C5e_O3_2OH            | RO2 1 ARR 0.25E-11 0 0 |
| 1701 | C5_RO2_O7 -> C5_O4_2OH             | RO2 1 ARR 0.36E-11 0 0 |
| 1702 | C5_RO2_O8 -> C5e_O5_2OH            | RO2 1 ARR 0.48E-11 0 0 |
| 1703 | C5_RO2_O9 -> C5_O6_2OH             | RO2 1 ARR 0.6E-11 0 0  |
| 1704 | C5_RO2_O10 -> C5e_O7_2OH           | RO2 1 ARR 0.71E-11 0 0 |
| 1705 | BZo_RO2_O7 -> BZo_O5_O             | RO2 1 ARR 0.21E-11 0 0 |
| 1706 | BZo_RO2_O9 -> BZo_O7_O             | RO2 1 ARR 0.43E-11 0 0 |
| 1707 | BZo_RO2_O11 -> BZo_O9_O            | RO2 1 ARR 0.65E-11 0 0 |
| 1708 | BZeo_RO2_O6 -> BZeo_O4_O           | RO2 1 ARR 0.1E-11 0 0  |
| 1709 | BZeo_RO2_O8 -> BZeo_O6_O           | RO2 1 ARR 0.32E-11 0 0 |
| 1710 | BZeo_RO2_O10 -> BZeo_O8_O          | RO2 1 ARR 0.54E-11 0 0 |
| 1711 | C5_RO2_O6 -> C5e_O4_O              | RO2 1 ARR 0.24E-11 0 0 |
| 1712 | C5_RO2_O7 -> C5_O5_O               | RO2 1 ARR 0.35E-11 0 0 |
| 1713 | C5_RO2_O8 -> C5e_O6_O              | RO2 1 ARR 0.46E-11 0 0 |
| 1714 | C5_RO2_O9 -> C5_O7_O               | RO2 1 ARR 0.57E-11 0 0 |
| 1715 | C5_RO2_O10 -> C5e_O8_O             | RO2 1 ARR 0.68E-11 0 0 |

|      |                                    |                  |
|------|------------------------------------|------------------|
| 1716 | BZo2_RO_O6 -> GLY + MALDIAL + HO2  | ARR 0.05E-6 0 0  |
| 1717 | BZo2_RO_O8 -> GLY + MALDIAL + HO2  | ARR 0.05E-6 0 0  |
| 1718 | BZo2_RO_O10 -> GLY + MALDIAL + HO2 | ARR 0.05E-6 0 0  |
| 1719 | BZeo2_RO_O5 -> GLY + MALDIAL + HO2 | ARR 0.05E-6 0 0  |
| 1720 | BZeo2_RO_O7 -> GLY + MALDIAL + HO2 | ARR 0.05E-6 0 0  |
| 1721 | BZeo2_RO_O9 -> GLY + MALDIAL + HO2 | ARR 0.05E-6 0 0  |
| 1722 | BZo_RO_O6 -> GLY + MALDIAL + HO2   | ARR 0.8E-6 0 0   |
| 1723 | BZo_RO_O8 -> GLY + MALDIAL + HO2   | ARR 0.88E-6 0 0  |
| 1724 | BZo_RO_O10 -> GLY + MALDIAL + HO2  | ARR 0.43E-6 0 0  |
| 1725 | BZeo_RO_O5 -> GLY + MALDIAL + HO2  | ARR 0.1E-6 0 0   |
| 1726 | BZeo_RO_O7 -> GLY + MALDIAL + HO2  | ARR 0.64E-6 0 0  |
| 1727 | BZeo_RO_O9 -> GLY + MALDIAL + HO2  | ARR 0.1E-6 0 0   |
| 1728 | C5_RO_O5 -> MALDIAL + CO + HO2     | ARR 0.05E-6 0 0  |
| 1729 | C5_RO_O6 -> MALDIAL + CO + HO2     | ARR 0.05E-6 0 0  |
| 1730 | C5_RO_O7 -> MALDIAL + CO + HO2     | ARR 0.05E-6 0 0  |
| 1731 | C5_RO_O8 -> MALDIAL + CO + HO2     | ARR 0.05E-6 0 0  |
| 1732 | C5_RO_O9 -> MALDIAL + CO + HO2     | ARR 0.05E-6 0 0  |
| 1733 | BZo_RO2_O7 -> BZouni_O6_O + OH     | ARR 0.01 0 0     |
| 1734 | BZo_RO2_O9 -> BZouni_O8_O + OH     | ARR 0.01 0 0     |
| 1735 | BZo_RO2_O11 -> BZouni_O10_O + OH   | ARR 0.01 0 0     |
| 1736 | BZeo_RO2_O6 -> BZeouni_O5_O + HO2  | ARR 0.01 0 0     |
| 1737 | BZeo_RO2_O8 -> BZeouni_O7_O + HO2  | ARR 0.01 0 0     |
| 1738 | BZeo_RO2_O10 -> BZeouni_O9_O + HO2 | ARR 0.01 0 0     |
| 1739 | C5_RO2_O6 -> C5euni_O5_O + OH      | ARR 0.3 0 0      |
| 1740 | C5_RO2_O7 -> C5uni_O6_O + OH       | ARR 0.8 0 0      |
| 1741 | C5_RO2_O8 -> C5euni_O7_O + OH      | ARR 0.8 0 0      |
| 1742 | C5_RO2_O9 -> C5uni_O8_O + HO2      | ARR 0.01 0 0     |
| 1743 | C5_RO2_O10 -> C5euni_O9_O + HO2    | ARR 0.01 0 0     |
| 1744 | BZo2_RO_O6 -> ROCS_O5_O + HO2      | ARR 0.05E-6 0 0  |
| 1745 | BZo2_RO_O8 -> ROCS_O7_O + HO2      | ARR 0.10E-6 0 0  |
| 1746 | BZo2_RO_O10 -> ROCS_O9_O + HO2     | ARR 0.60E-6 0 0  |
| 1747 | BZo2_RO_O10 -> ROCS_O8_O + HO2     | ARR 0.35E-6 0 0  |
| 1748 | BZeo2_RO_O5 -> ROCS_O4_O + HO2     | ARR 0.05E-6 0 0  |
| 1749 | BZeo2_RO_O7 -> ROCS_O6_O + HO2     | ARR 0.05E-6 0 0  |
| 1750 | BZeo2_RO_O9 -> ROCS_O8_O + HO2     | ARR 0.55E-6 0 0  |
| 1751 | BZo_RO_O6 -> ROCS_O5_O + HO2       | ARR 0.004E-6 0 0 |
| 1752 | BZo_RO_O8 -> ROCS_O7_O + HO2       | ARR 0.001E-6 0 0 |
| 1753 | BZo_RO_O10 -> ROCS_O9_O + HO2      | ARR 0.02E-6 0 0  |
| 1754 | BZeo_RO_O5 -> ROCS_O4_O + HO2      | ARR 0.45E-6 0 0  |
| 1755 | BZeo_RO_O7 -> ROCS_O6_O + HO2      | ARR 0.007E-6 0 0 |
| 1756 | BZeo_RO_O9 -> ROCS_O8_O + HO2      | ARR 0.45E-6 0 0  |
| 1757 | C5_RO_O5 -> C5e_O4_O + HO2         | ARR 0.05E-6 0 0  |
| 1758 | C5_RO_O6 -> C5_O5_O + HO2          | ARR 0.05E-6 0 0  |
| 1759 | C5_RO_O7 -> C5e_O6_O + HO2         | ARR 0.10E-6 0 0  |
| 1760 | C5_RO_O8 -> C5_O7_O + HO2          | ARR 0.25E-6 0 0  |
| 1761 | C5_RO_O9 -> C5e_O8_O + HO2         | ARR 0.50E-6 0 0  |

|      |                               |                 |
|------|-------------------------------|-----------------|
| 1762 | C5_RO_O9 -> C5_O7_O + HO2     | ARR 0.45E-6 0 0 |
| 1763 | BZo_RO2_O7 -> C5_RO2_O8 + CO  | ARR 0.6 0 0     |
| 1764 | BZo_RO2_O9 -> C5_RO2_O10 + CO | ARR 0.014 0 0   |
| 1765 | BZeo_RO2_O6 -> C5_RO2_O7 + CO | ARR 0.8 0 0     |
| 1766 | BZeo_RO2_O8 -> C5_RO2_O9 + CO | ARR 0.06 0 0    |

## Supplement S3: Mech 2 – species

| name         | SMILES                                                             | molar weight<br>(g.mol <sup>-1</sup> ) |
|--------------|--------------------------------------------------------------------|----------------------------------------|
| A2PAN        | <chem>OCC(O)C(=O)OON(=O)=O</chem>                                  | 167.1                                  |
| A2PANO       | <chem>OCC(O)C(=O)[O]</chem>                                        | 105.1                                  |
| A2PANOO      | <chem>OCC(O)C(=O)O[O]</chem>                                       | 121.1                                  |
| ACMAL2OH     | <chem>O=C(O)C(O)=C(O)C(=O)O</chem>                                 | 148.1                                  |
| ACO3         | <chem>[O]OC(=O)C=C</chem>                                          | 87.1                                   |
| ACOX         | <chem>O=C(O)C(=O)O</chem>                                          | 90.0                                   |
| ACR          | <chem>C=CC=O</chem>                                                | 56.1                                   |
| ACRO2        | <chem>OCC(O[O])C=O</chem>                                          | 105.1                                  |
| BENZ2OH1O    | <chem>Oc1ccccc([O])c1O</chem>                                      | 125.1                                  |
| BENZ2OHO2    | <chem>c1(O[O])cccc(O)c1O</chem>                                    | 141.1                                  |
| BENZ2OHOOH   | <chem>OOc1ccccc(O)c1O</chem>                                       | 142.1                                  |
| BENZ3OH      | <chem>Oc1ccccc(O)c1O</chem>                                        | 126.1                                  |
| BENZ3OH1O    | <chem>Oc1ccc([O])c(O)c1O</chem>                                    | 141.1                                  |
| BENZ3OHBP2OH | <chem>OC2=CC1OOC(O)(C1O)C2(O)O</chem>                              | 192.1                                  |
| BENZ3OHBPO   | <chem>[O]C1(O)C(O)=CC2OOC1(O)C2O</chem>                            | 191.1                                  |
| BENZ3OHBPO2  | <chem>[O]OC1(O)C(O)=CC2OOC1(O)C2O</chem>                           | 207.1                                  |
| BENZ3OHBPOOH | <chem>OOC1(O)C(O)=CC2OOC1(O)C2O</chem>                             | 208.1                                  |
| BENZ3OHO2    | <chem>c1(O[O])ccc(O)c(O)c1O</chem>                                 | 157.1                                  |
| BENZ3OHOOH   | <chem>OOc1ccc(O)c(O)c1O</chem>                                     | 158.1                                  |
| BENZ4OH      | <chem>Oc1ccc(O)c(O)c1O</chem>                                      | 142.1                                  |
| BENZ4OHBP2OH | <chem>OC2=CC1(O)OOC(O)(C1O)C2(O)O</chem>                           | 208.1                                  |
| BENZ4OHBPO   | <chem>[O]C1(O)C(O)=CC2(O)OOC1(O)C2O</chem>                         | 207.1                                  |
| BENZ4OHBPO2  | <chem>[O]OC1(O)C(O)=CC2(O)OOC1(O)C2O</chem>                        | 223.1                                  |
| BENZ4OHBPOOH | <chem>OOC1(O)C(O)=CC2(O)OOC1(O)C2O</chem>                          | 224.1                                  |
| BENZ5OH      | <chem>Oc1cc(O)c(O)c(O)c1O</chem>                                   | 158.1                                  |
| BENZENE      | <chem>c1ccccc1</chem>                                              | 78.1                                   |
| BEPOX        | <chem>OC1C3OOC1C2OC2C3O</chem>                                     | 160.1                                  |
| BEPOXOH      | <chem>OC2C1OOC(O)(C1O)C3OC23</chem>                                | 176.1                                  |
| BZBI_BZBI    | <chem>O(C1C=CC2OOC1C2O)OC1C=CC2OOC1C2O</chem>                      | 286.2                                  |
| BZBI_BZFU    | <chem>O(C1C=CC2OOC1C2O)OC1C(O)COC1=O</chem>                        | 260.2                                  |
| BZBI_BZMUa   | <chem>O(C1C=CC2OOC1C2O)OC(=O)C1OC1C=CC=O</chem>                    | 284.2                                  |
| BZBI_BZMUb   | <chem>O=CC(O)C(OOC1C=CC2OOC1C2O)C1OC1C=O</chem>                    | 302.2                                  |
| BZBI_C2a     | <chem>O(C1C=CC2OOC1C2O)OC(=O)C=O</chem>                            | 216.1                                  |
| BZBI_C2b     | <chem>O(C1C=CC2OOC1C2O)OCC=O</chem>                                | 202.2                                  |
| BZBI_C2c     | <chem>OCC(=O)(OOC1C=CC2OOC1C2O)</chem>                             | 218.2                                  |
| BZBI_C3a     | <chem>OC(C=O)C(=O)(OOC1C=CC2OOC1C2O)</chem>                        | 246.2                                  |
| BZBI_C3DI    | <chem>O(C1C=CC2OOC1C2O)OC(C=O)C=O</chem>                           | 230.2                                  |
| BZBI_C4a     | <chem>O(C1C=CC2OOC1C2O)OC(=O)C=CC(=O)C=O</chem>                    | 270.2                                  |
| BZBI_C5a     | <chem>OC(C=O)C(=O)C=CC(=O)(OOC1C=CC2OOC1C2O)</chem>                | 300.2                                  |
| BZBI_C5DI    | <chem>O=CC=CC(OOC1C=CC2OOC1C2O)C=O</chem>                          | 256.2                                  |
| BZBI_C6a     | <chem>O(C1C=CC2OOC1C2O)Oc1ccccc1</chem>                            | 236.2                                  |
| BZBI_CATE    | <chem>O(C1C=CC2OOC1C2O)Oc1ccccc1O</chem>                           | 252.2                                  |
| BZBI_DNP     | <chem>O(C1C=CC2OOC1C2O)OC1(O)C(=CC2(OOC1C2O)N(=O)=O)N(=O)=O</chem> | 392.2                                  |

|              |                                                              |       |
|--------------|--------------------------------------------------------------|-------|
| BZBI_EPX     | O(C1C=CC2OOC1C2O)OC(=O)C1OC1C=O                              | 258.2 |
| BZBI_MALa    | O(C1C=CC2OOC1C2O)OC(=O)C=CC=O                                | 242.2 |
| BZBI_MALb    | O(C1C=CC2OOC1C2O)OC(C=O)C(O)C=O                              | 260.2 |
| BZBI_MALc    | O(C1C=CC2OOC1C2O)OC1C(=O)OC(=O)C1O                           | 274.2 |
| BZBI_NBZa    | O(C1C=CC2OOC1C2O)OC1C(=O)OCC1ON(=O)=O                        | 305.2 |
| BZBI_NBZb    | O(C1C=CC2OOC1C2O)OC1C(=O)C=CC(=O)C1ON(=O)=O                  | 329.2 |
| BZBI_NCAT    | O(C1C=CC2OOC1C2O)OC1(O)C(=CC2(OOC1C2O)N(=O)=O)O              | 363.2 |
| BZBI_NDN     | O(C1C=CC2OOC1C2O)OC1(O)C(=CC2(OOC1C2ON(=O)=O)N(=O)=O)N(=O)=O | 437.2 |
| BZBI_NNC     | O(C1C=CC2OOC1C2O)OC1(O)C(=CC2(OOC1C2ON(=O)=O)N(=O)=O)O       | 408.2 |
| BZBI_NPHa    | O(C1C=CC2OOC1C2O)OC1(O)C=CC2OOC1C2ON(=O)=O                   | 347.2 |
| BZBI_NPHb    | O(C1C=CC2OOC1C2O)Oc1ccccc1N(=O)=O                            | 281.2 |
| BZBI_PBZ     | O(C1C=CC2OOC1C2O)OC1C(=O)C=CC(=O)C1O                         | 284.2 |
| BZBI_PHEN    | O(C1C=CC2OOC1C2O)OC1(O)C=CC2OOC1C2O                          | 302.2 |
| BZBIPER2OH   | OC1C=CC2OOC1C2O                                              | 144.1 |
| BZBIPERNO3   | O=N(=O)OC1C=CC2OOC1C2O                                       | 189.1 |
| BZBIPERO     | [O]C1C=CC2OOC1C2O                                            | 143.1 |
| BZBIPERO2    | [O]OC1C=CC2OOC1C2O                                           | 159.1 |
| BZBIPEROOH   | OOC1C=CC2OOC1C2O                                             | 160.1 |
| BZEMUCCO     | O=CC1OC1C(=O)C(O)C=O                                         | 158.1 |
| BZEMUCCO2H   | O=CC=CC1OC1C(=O)O                                            | 142.1 |
| BZEMUCCO3    | [O]OC(=O)C1OC1C=CC=O                                         | 157.1 |
| BZEMUCCO3H   | OOC(=O)C1OC1C=CC=O                                           | 158.1 |
| BZEMUCNO3    | O=CC1OC1C(ON(=O)=O)C(O)C=O                                   | 205.1 |
| BZEMUCO      | O=CC(O)C([O])C1OC1C=O                                        | 159.1 |
| BZEMUCO2     | O=CC(O)C(O[O])C1OC1C=O                                       | 175.1 |
| BZEMUCOH     | O=CC(O)C(O)C1OC1C=O                                          | 160.1 |
| BZEMUCOOH    | O=CC(O)C(OO)C1OC1C=O                                         | 176.1 |
| BZEMUCPAN    | O=CC=CC1OC1C(=O)OON(=O)=O                                    | 203.1 |
| BZeo_O3_2OH  | OC1C2OC2C3OOC1C3(O)                                          | 160.1 |
| BZeo_O4_NO3  | O=N(=O)OC1C2OC2C3OOC1C3(O)                                   | 205.1 |
| BZeo_O4_O    | O=C1C2OC2C3OOC1C3(O)                                         | 158.1 |
| BZeo_O4_OOH  | OOC1C2OC2C3OOC1C3(O)                                         | 176.1 |
| BZeo_O5_2OH  | O=C=CC(OO)C(O)C(O)C(=O)O                                     | 192.1 |
| BZeo_O6_NO3  | O=C=CC(OO)C(O)C(O)C(=O)ON(=O)=O                              | 237.1 |
| BZeo_O6_O    | O=C=CC(OO)C(=O)C(O)C(=O)O                                    | 190.1 |
| BZeo_O6_OOH  | O=C=CC(OO)C(O)C(O)C(=O)OO                                    | 208.1 |
| BZeo_O7_2OH  | O=C(O)C(O)C(=O)CC(OO)C(=O)OO                                 | 224.1 |
| BZeo_O8_NO3  | O=C(ON(=O)=O)C(O)C(=O)CC(OO)C(=O)OO                          | 269.1 |
| BZeo_O8_O    | O=C(O)C(=O)C(=O)CC(OO)C(=O)OO                                | 222.1 |
| BZeo_O8_OOH  | O=C(OO)C(O)C(=O)CC(OO)C(=O)OO                                | 240.1 |
| BZeo_RO_O5   | [O]C1C2OC2C3OOC1C3(O)                                        | 159.1 |
| BZeo_RO_O7   | O=C=CC(OO)C(O)C(O)C(=O)[O]                                   | 191.1 |
| BZeo_RO_O9   | O=C([O])C(O)C(=O)CC(OO)C(=O)OO                               | 223.1 |
| BZeo_RO2_O10 | O=C(O[O])C(O)C(=O)CC(OO)C(=O)OO                              | 239.1 |
| BZeo_RO2_O6  | [O]OC1C2OC2C3OOC1C3(O)                                       | 175.1 |
| BZeo_RO2_O8  | O=C=CC(OO)C(O)C(O)C(=O)O[O]                                  | 207.1 |

|              |                                                                  |       |
|--------------|------------------------------------------------------------------|-------|
| BZeo2_RO_O5  | [O]C1C2OC2C3OOC1C3(O)                                            | 159.1 |
| BZeo2_RO_O7  | O=C=CC(OO)C(O)C(O)C(=O)[O]                                       | 191.1 |
| BZeo2_RO_O9  | O=C([O])C(O)C(=O)CC(OO)C(=O)OO                                   | 223.1 |
| BZeo05_5     | O(C1C2OC2C3OOC1C3(O))OC1C2OC2C3OOC1C3(O)                         | 318.2 |
| BZeo05_7     | O=C=CC(OO)C(O)C(O)C(=O)(OOC1C2OC2C3OOC1C3(O))                    | 350.2 |
| BZeo05_9     | O=C(OOC1C2OC2C3OOC1C3(O))C(O)C(=O)CC(OO)C(=O)OO                  | 382.2 |
| BZeo05_BZBI  | O(C1C2OC2C3OOC1C3(O))OC1C=CC2OOC1C2O                             | 302.2 |
| BZeo05_BZFU  | O(C1C2OC2C3OOC1C3(O))OC1C(O)COC1=O                               | 276.2 |
| BZeo05_BZMUa | O(C1C2OC2C3OOC1C3(O))OC(=O)C1OC1C=CC=O                           | 300.2 |
| BZeo05_BZMUb | O=CC(O)C(OOC1C2OC2C3OOC1C3(O))C1OC1C=O                           | 318.2 |
| BZeo05_C2a   | O(C1C2OC2C3OOC1C3(O))OC(=O)C=O                                   | 232.1 |
| BZeo05_C2b   | O(C1C2OC2C3OOC1C3(O))OCC=O                                       | 218.2 |
| BZeo05_C2c   | OCC(=O)(OOC1C2OC2C3OOC1C3(O))                                    | 234.2 |
| BZeo05_C3a   | OC(C=O)C(=O)(OOC1C2OC2C3OOC1C3(O))                               | 262.2 |
| BZeo05_C3DI  | O(C1C2OC2C3OOC1C3(O))OC(C=O)C=O                                  | 246.2 |
| BZeo05_C4a   | O(C1C2OC2C3OOC1C3(O))OC(=O)C=CC(=O)C=O                           | 286.2 |
| BZeo05_C5a   | OC(C=O)C(=O)C=CC(=O)(OOC1C2OC2C3OOC1C3(O))                       | 316.2 |
| BZeo05_C5DI  | O=CC=CC(OOC1C2OC2C3OOC1C3(O))C=O                                 | 272.2 |
| BZeo05_C5e05 | O=CC(OOC1C2OC2C3OOC1C3(O))C(O)C(O)C=O                            | 306.2 |
| BZeo05_C5e07 | O=CC(OO)C(O)C(O)C(=O)(OOC1C2OC2C3OOC1C3(O))                      | 338.2 |
| BZeo05_C5e09 | O=C(OOC1C2OC2C3OOC1C3(O))C(OO)C(O)C(O)C(OO)=O                    | 370.2 |
| BZeo05_C5O6  | OOC=CC(O)C(O)C(=O)(OOC1C2OC2C3OOC1C3(O))                         | 322.2 |
| BZeo05_C5O8  | O=C(OOC1C2OC2C3OOC1C3(O))C(O)C(O)C(O)C(=O)OO                     | 354.2 |
| BZeo05_C6a   | O(C1C2OC2C3OOC1C3(O))Oc1ccccc1                                   | 252.2 |
| BZeo05_CATE  | O(C1C2OC2C3OOC1C3(O))Oc1ccccc1O                                  | 268.2 |
| BZeo05_DNP   | O(C1C2OC2C3OOC1C3(O))OC1(O)C(=CC2(OOC1C2O)N(=O)=O)N(=O)=O        | 408.2 |
| BZeo05_EPX   | O(C1C2OC2C3OOC1C3(O))OC(=O)C1OC1C=O                              | 274.2 |
| BZeo05_MALa  | O(C1C2OC2C3OOC1C3(O))OC(=O)C=CC=O                                | 258.2 |
| BZeo05_MALb  | O(C1C2OC2C3OOC1C3(O))OC(C=O)C(O)C=O                              | 276.2 |
| BZeo05_MALc  | O(C1C2OC2C3OOC1C3(O))OC1C(=O)OC(=O)C1O                           | 290.2 |
| BZeo05_NBZa  | O(C1C2OC2C3OOC1C3(O))OC1C(=O)OCC1ON(=O)=O                        | 321.2 |
| BZeo05_NBZb  | O(C1C2OC2C3OOC1C3(O))OC1C(=O)C=CC(=O)C1ON(=O)=O                  | 345.2 |
| BZeo05_NCAT  | O(C1C2OC2C3OOC1C3(O))OC1(O)C(=CC2(OOC1C2O)N(=O)=O)O              | 379.2 |
| BZeo05_NDN   | O(C1C2OC2C3OOC1C3(O))OC1(O)C(=CC2(OOC1C2ON(=O)=O)N(=O)=O)N(=O)=O | 453.2 |
| BZeo05_NNC   | O(C1C2OC2C3OOC1C3(O))OC1(O)C(=CC2(OOC1C2ON(=O)=O)N(=O)=O)O       | 424.2 |
| BZeo05_NPHa  | O(C1C2OC2C3OOC1C3(O))OC1(O)C=CC2OOC1C2ON(=O)=O                   | 363.2 |
| BZeo05_NPHb  | O(C1C2OC2C3OOC1C3(O))Oc1ccccc1N(=O)=O                            | 297.2 |
| BZeo05_PBZ   | O(C1C2OC2C3OOC1C3(O))OC1C(=O)C=CC(=O)C1O                         | 300.2 |
| BZeo05_PHEN  | O(C1C2OC2C3OOC1C3(O))OC1(O)C=CC2OOC1C2O                          | 318.2 |
| BZeo07_7     | O=C=CC(OO)C(O)C(O)C(=O)(OO(C(=O)C(O)C(O)C(OO)C=C=O))             | 382.2 |
| BZeo07_9     | O=C=CC(OO)C(O)C(O)C(=O)(OO(C(C(O)C(=O)CC(OO)C(=O)OO)=O))         | 414.2 |
| BZeo07_BZBI  | O=C=CC(OO)C(O)C(O)C(=O)(OOC1C=CC2OOC1C2O)                        | 334.2 |
| BZeo07_BZFU  | O=C=CC(OO)C(O)C(O)C(=O)(OOC1C(O)COC1=O)                          | 308.2 |
| BZeo07_BZMUa | O=C=CC(OO)C(O)C(O)C(=O)(OOC(=O)C1OC1C=CC=O)                      | 332.2 |
| BZeo07_BZMUb | O=C=CC(OO)C(O)C(O)C(=O)(OO(C(C1OC1C=O)C(O)C=O))                  | 350.2 |
| BZeo07_C2a   | O=C=CC(OO)C(O)C(O)C(=O)(OOC(=O)C=O)                              | 264.1 |

|              |                                                                       |       |
|--------------|-----------------------------------------------------------------------|-------|
| BZeo07_C2b   | O=C=CC(OO)C(O)C(O)C(=O)(OCC=O)                                        | 250.2 |
| BZeo07_C2c   | O=C=CC(OO)C(O)C(O)C(=O)(OO(C(=O)CO))                                  | 266.2 |
| BZeo07_C3a   | O=C=CC(OO)C(O)C(O)C(=O)(OO(C(=O)C(C=O)O))                             | 294.2 |
| BZeo07_C3DI  | O=C=CC(OO)C(O)C(O)C(=O)(OOC(C=O)C=O)                                  | 278.2 |
| BZeo07_C4a   | O=C=CC(OO)C(O)C(O)C(=O)(OOC(=O)C=CC(=O)C=O)                           | 318.2 |
| BZeo07_C5a   | O=C=CC(OO)C(O)C(O)C(=O)(OO(C(=O)C=CC(=O)C(C=O)O))                     | 348.2 |
| BZeo07_C5DI  | O=C=CC(OO)C(O)C(O)C(=O)(OO(C(C=O)C=CC=O))                             | 304.2 |
| BZeo07_C5e05 | O=C=CC(OO)C(O)C(O)C(=O)(OO(C(C(O)C(O)C=O)C=O))                        | 338.2 |
| BZeo07_C5e07 | O=C=CC(OO)C(O)C(O)C(=O)(OO(C(=O)C(O)C(O)C(OO)C=O))                    | 370.2 |
| BZeo07_C5e09 | O=C=CC(OO)C(O)C(O)C(=O)(OO(C(C(OO)C(O)C(O)C(OO)=O)=O))                | 402.2 |
| BZeo07_C5O6  | O=C=CC(OO)C(O)C(O)C(=O)(OO(C(=O)C(O)C(O)C=COO))                       | 354.2 |
| BZeo07_C5O8  | O=C=CC(OO)C(O)C(O)C(=O)(OO(C(C(O)C(O)C(O)C(=O)OO)=O))                 | 386.2 |
| BZeo07_C6a   | O=C=CC(OO)C(O)C(O)C(=O)(OOc1cccc1)                                    | 284.2 |
| BZeo07_CATE  | O=C=CC(OO)C(O)C(O)C(=O)(OOc1cccc1O)                                   | 300.2 |
| BZeo07_DNP   | O=C=CC(OO)C(O)C(O)C(=O)(OOC1(O)C(=CC2(OOC1C2O)N(=O)=O)N(=O)=O)        | 440.2 |
| BZeo07_EPX   | O=C=CC(OO)C(O)C(O)C(=O)(OOC(=O)C1OC1C=O)                              | 306.2 |
| BZeo07_MALa  | O=C=CC(OO)C(O)C(O)C(=O)(OOC(=O)C=CC=O)                                | 290.2 |
| BZeo07_MALb  | O=C=CC(OO)C(O)C(O)C(=O)(OOC(C=O)C(O)C=O)                              | 308.2 |
| BZeo07_MALc  | O=C=CC(OO)C(O)C(O)C(=O)(OOC1C(=O)OC(=O)C1O)                           | 322.2 |
| BZeo07_NBZa  | O=C=CC(OO)C(O)C(O)C(=O)(OOC1C(=O)OCC1ON(=O)=O)                        | 353.2 |
| BZeo07_NBZb  | O=C=CC(OO)C(O)C(O)C(=O)(OOC1C(=O)C=CC(=O)C1ON(=O)=O)                  | 377.2 |
| BZeo07_NCAT  | O=C=CC(OO)C(O)C(O)C(=O)(OOC1(O)C(=CC2(OOC1C2O)N(=O)=O)O)              | 411.2 |
| BZeo07_NDN   | O=C=CC(OO)C(O)C(O)C(=O)(OOC1(O)C(=CC2(OOC1C2ON(=O)=O)N(=O)=O)N(=O)=O) | 485.2 |
| BZeo07_NNC   | O=C=CC(OO)C(O)C(O)C(=O)(OOC1(O)C(=CC2(OOC1C2ON(=O)=O)N(=O)=O)O)       | 456.2 |
| BZeo07_NPHa  | O=C=CC(OO)C(O)C(O)C(=O)(OOC1(O)C=CC2OOC1C2ON(=O)=O)                   | 395.2 |
| BZeo07_NPHb  | O=C=CC(OO)C(O)C(O)C(=O)(OOc1cccc1N(=O)=O)                             | 329.2 |
| BZeo07_PBZ   | O=C=CC(OO)C(O)C(O)C(=O)(OOC1C(=O)C=CC(=O)C1O)                         | 332.2 |
| BZeo07_PHEN  | O=C=CC(OO)C(O)C(O)C(=O)(OOC1(O)C=CC2OOC1C2O)                          | 350.2 |
| BZeo09_9     | O=C(OO(C(C(O)C(=O)CC(OO)C(=O)OO)=O))C(O)C(=O)CC(OO)C(=O)OO            | 446.2 |
| BZeo09_BZBI  | O=C(OOC1C=CC2OOC1C2O)C(O)C(=O)CC(OO)C(=O)OO                           | 366.2 |
| BZeo09_BZFU  | O=C(OOC1C(O)COC1=O)C(O)C(=O)CC(OO)C(=O)OO                             | 340.2 |
| BZeo09_BZMUa | O=C(OOC(=O)C1OC1C=CC=O)C(O)C(=O)CC(OO)C(=O)OO                         | 364.2 |
| BZeo09_BZMUb | O=C(OO(C(C1OC1C=O)C(O)C=O))C(O)C(=O)CC(OO)C(=O)OO                     | 382.2 |
| BZeo09_C2a   | O=C(OOC(=O)C=O)C(O)C(=O)CC(OO)C(=O)OO                                 | 296.1 |
| BZeo09_C2b   | O=C(OOCC=O)C(O)C(=O)CC(OO)C(=O)OO                                     | 282.2 |
| BZeo09_C2c   | O=C(OO(C(=O)CO))C(O)C(=O)CC(OO)C(=O)OO                                | 298.2 |
| BZeo09_C3a   | O=C(OO(C(=O)C(C=O)O))C(O)C(=O)CC(OO)C(=O)OO                           | 326.2 |
| BZeo09_C3DI  | O=C(OOC(C=O)C=O)C(O)C(=O)CC(OO)C(=O)OO                                | 310.2 |
| BZeo09_C4a   | O=C(OOC(=O)C=CC(=O)C=O)C(O)C(=O)CC(OO)C(=O)OO                         | 350.2 |
| BZeo09_C5a   | O=C(OO(C(=O)C=CC(=O)C(C=O)O))C(O)C(=O)CC(OO)C(=O)OO                   | 380.2 |
| BZeo09_C5DI  | O=C(OO(C(C=O)C=CC=O))C(O)C(=O)CC(OO)C(=O)OO                           | 336.2 |
| BZeo09_C5e05 | O=C(OO(C(C(O)C(O)C=O)C=O))C(O)C(=O)CC(OO)C(=O)OO                      | 370.2 |
| BZeo09_C5e07 | O=C(OO(C(=O)C(O)C(O)C(OO)C=O))C(O)C(=O)CC(OO)C(=O)OO                  | 402.2 |
| BZeo09_C5e09 | O=C(OO(C(C(OO)C(O)C(O)C(OO)=O)=O))C(O)C(=O)CC(OO)C(=O)OO              | 434.2 |
| BZeo09_C5O6  | O=C(OO(C(=O)C(O)C(O)C=COO))C(O)C(=O)CC(OO)C(=O)OO                     | 386.2 |
| BZeo09_C5O8  | O=C(OO(C(C(O)C(O)C(O)C(=O)OO)=O))C(O)C(=O)CC(OO)C(=O)OO               | 418.2 |

|              |                                                                         |       |
|--------------|-------------------------------------------------------------------------|-------|
| BZeoO9_C6a   | O=C(OOc1cccc1)C(O)C(=O)CC(OO)C(=O)OO                                    | 316.2 |
| BZeoO9_CATE  | O=C(OOc1cccc1O)C(O)C(=O)CC(OO)C(=O)OO                                   | 332.2 |
| BZeoO9_DNP   | O=C(OOC1(O)C(=CC2(OOC1C2O)N(=O)=O)N(=O)=O)C(O)C(=O)CC(OO)C(=O)OO        | 472.2 |
| BZeoO9_EPX   | O=C(OOC(=O)C1OC1C=O)C(O)C(=O)CC(OO)C(=O)OO                              | 338.2 |
| BZeoO9_MALa  | O=C(OOC(=O)C=CC=O)C(O)C(=O)CC(OO)C(=O)OO                                | 322.2 |
| BZeoO9_MALb  | O=C(OOC(C=O)C(O)C=O)C(O)C(=O)CC(OO)C(=O)OO                              | 340.2 |
| BZeoO9_MALc  | O=C(OOC1C(=O)OC(=O)C1O)C(O)C(=O)CC(OO)C(=O)OO                           | 354.2 |
| BZeoO9_NBZa  | O=C(OOC1C(=O)OCC1ON(=O)=O)C(O)C(=O)CC(OO)C(=O)OO                        | 385.2 |
| BZeoO9_NBZb  | O=C(OOC1C(=O)C=CC(=O)C1ON(=O)=O)C(O)C(=O)CC(OO)C(=O)OO                  | 409.2 |
| BZeoO9_NCAT  | O=C(OOC1(O)C(=CC2(OOC1C2O)N(=O)=O)O)C(O)C(=O)CC(OO)C(=O)OO              | 443.2 |
| BZeoO9_NDN   | O=C(OOC1(O)C(=CC2(OOC1C2ON(=O)=O)N(=O)=O)N(=O)=O)C(O)C(=O)CC(OO)C(=O)OO | 517.2 |
| BZeoO9_NNC   | O=C(OOC1(O)C(=CC2(OOC1C2ON(=O)=O)N(=O)=O)O)C(O)C(=O)CC(OO)C(=O)OO       | 488.2 |
| BZeoO9_NPHa  | O=C(OOC1(O)C=CC2OOC1C2ON(=O)=O)C(O)C(=O)CC(OO)C(=O)OO                   | 427.2 |
| BZeoO9_NPHb  | O=C(OOc1cccc1N(=O)=O)C(O)C(=O)CC(OO)C(=O)OO                             | 361.2 |
| BZeoO9_PBZ   | O=C(OOC1C(=O)C=CC(=O)C1O)C(O)C(=O)CC(OO)C(=O)OO                         | 364.2 |
| BZeoO9_PHEN  | O=C(OOC1(O)C=CC2OOC1C2O)C(O)C(=O)CC(OO)C(=O)OO                          | 382.2 |
| BZeouni_O5_O | OOC1C2OC2C3OOC1C3(=O)                                                   | 174.1 |
| BZeouni_O7_O | O=C=CC(OO)C(=O)C(O)C(=O)OO                                              | 206.1 |
| BZeouni_O9_O | O=C(OO)C(=O)C(=O)CC(OO)C(=O)OO                                          | 238.1 |
| BZEPOXMUC    | O=CC=CC1OC1C=O                                                          | 126.1 |
| BZFU_BZFU    | O(C1C(O)COC1=O)OC1C(O)COC1=O                                            | 234.2 |
| BZFU_C2a     | O(C1C(O)COC1=O)OC(=O)C=O                                                | 190.1 |
| BZFU_C2b     | O(C1C(O)COC1=O)OCC=O                                                    | 176.1 |
| BZFU_C2c     | OCC(=O)(OOC1C(O)COC1=O)                                                 | 192.1 |
| BZFU_C3a     | OC(C=O)C(=O)(OOC1C(O)COC1=O)                                            | 220.1 |
| BZFU_C4a     | O(C1C(O)COC1=O)OC(=O)C=CC(=O)C=O                                        | 244.2 |
| BZFU_C5a     | OC(C=O)C(=O)C=CC(=O)(OOC1C(O)COC1=O)                                    | 274.2 |
| BZFU_CATE    | O(C1C(O)COC1=O)Oc1cccc1O                                                | 226.2 |
| BZFU_DNP     | O(C1C(O)COC1=O)OC1(O)C(=CC2(OOC1C2O)N(=O)=O)N(=O)=O                     | 366.2 |
| BZFU_MALc    | O(C1C(O)COC1=O)OC1C(=O)OC(=O)C1O                                        | 248.1 |
| BZFU_NBZb    | O(C1C(O)COC1=O)OC1C(=O)C=CC(=O)C1ON(=O)=O                               | 303.2 |
| BZFU_NCAT    | O(C1C(O)COC1=O)OC1(O)C(=CC2(OOC1C2O)N(=O)=O)O                           | 337.2 |
| BZFU_NDN     | O(C1C(O)COC1=O)OC1(O)C(=CC2(OOC1C2ON(=O)=O)N(=O)=O)N(=O)=O              | 411.2 |
| BZFU_NNC     | O(C1C(O)COC1=O)OC1(O)C(=CC2(OOC1C2ON(=O)=O)N(=O)=O)O                    | 382.2 |
| BZFU_NPHb    | O(C1C(O)COC1=O)Oc1cccc1N(=O)=O                                          | 255.2 |
| BZFU_PBZ     | O(C1C(O)COC1=O)OC1C(=O)C=CC(=O)C1O                                      | 258.2 |
| BZFUCO       | OC1COC(=O)C1=O                                                          | 116.1 |
| BZFUO        | [O]C1C(O)COC1=O                                                         | 117.1 |
| BZFUO2       | [O]OC1C(O)COC1=O                                                        | 133.1 |
| BZFUOH       | OC1C(O)COC1=O                                                           | 118.1 |
| BZFUONE      | C1OC(=O)C=C1                                                            | 84.1  |
| BZFUONOO     | [O-][O+]=CC(=O)OCC=O                                                    | 132.1 |
| BZFUONOOA    | [O-][O+]=CC(=O)OCC=O                                                    | 132.1 |
| BZFUOOH      | OOC1C(O)COC1=O                                                          | 134.1 |
| BZMUa_BZFU   | O(C(=O)C1OC1C=CC=O)OC1C(O)COC1=O                                        | 258.2 |
| BZMUa_BZMUa  | O(C(=O)C1OC1C=CC=O)OC(=O)C1OC1C=CC=O                                    | 282.2 |

|             |                                                                |       |
|-------------|----------------------------------------------------------------|-------|
| BZMUa_BZMUb | O=CC(O)C(OOC(=O)C1OC1C=CC=O)C1OC1C=O                           | 300.2 |
| BZMUa_C2a   | O(C(=O)C1OC1C=CC=O)OC(=O)C=O                                   | 214.1 |
| BZMUa_C2b   | O(C(=O)C1OC1C=CC=O)OCC=O                                       | 200.2 |
| BZMUa_C2c   | OCC(=O)(OOC(=O)C1OC1C=CC=O)                                    | 216.1 |
| BZMUa_C3a   | OC(C=O)C(=O)(OOC(=O)C1OC1C=CC=O)                               | 244.2 |
| BZMUa_C3DI  | O(C(=O)C1OC1C=CC=O)OC(C=O)C=O                                  | 228.2 |
| BZMUa_C4a   | O(C(=O)C1OC1C=CC=O)OC(=O)C=CC(=O)C=O                           | 268.2 |
| BZMUa_C5a   | OC(C=O)C(=O)C=CC(=O)(OOC(=O)C1OC1C=CC=O)                       | 298.2 |
| BZMUa_C5DI  | O=CC=CC(OOC(=O)C1OC1C=CC=O)C=O                                 | 254.2 |
| BZMUa_C6a   | O(C(=O)C1OC1C=CC=O)Oc1ccccc1                                   | 234.2 |
| BZMUa_CATE  | O(C(=O)C1OC1C=CC=O)Oc1ccccc1O                                  | 250.2 |
| BZMUa_DNP   | O(C(=O)C1OC1C=CC=O)OC1(O)C(=CC2(OOC1C2O)N(=O)=O)N(=O)=O        | 390.2 |
| BZMUa_EPX   | O(C(=O)C1OC1C=CC=O)OC(=O)C1OC1C=O                              | 256.2 |
| BZMUa_MALa  | O(C(=O)C1OC1C=CC=O)OC(=O)C=CC=O                                | 240.2 |
| BZMUa_MALb  | O(C(=O)C1OC1C=CC=O)OC(C=O)C(O)C=O                              | 258.2 |
| BZMUa_MALc  | O(C(=O)C1OC1C=CC=O)OC1C(=O)OC(=O)C1O                           | 272.2 |
| BZMUa_NBZa  | O(C(=O)C1OC1C=CC=O)OC1C(=O)OCC1ON(=O)=O                        | 303.2 |
| BZMUa_NBZb  | O(C(=O)C1OC1C=CC=O)OC1C(=O)C=CC(=O)C1ON(=O)=O                  | 327.2 |
| BZMUa_NCAT  | O(C(=O)C1OC1C=CC=O)OC1(O)C(=CC2(OOC1C2O)N(=O)=O)O              | 361.2 |
| BZMUa_NDN   | O(C(=O)C1OC1C=CC=O)OC1(O)C(=CC2(OOC1C2ON(=O)=O)N(=O)=O)N(=O)=O | 435.2 |
| BZMUa_NNC   | O(C(=O)C1OC1C=CC=O)OC1(O)C(=CC2(OOC1C2ON(=O)=O)N(=O)=O)O       | 406.2 |
| BZMUa_NPHa  | O(C(=O)C1OC1C=CC=O)OC1(O)C=CC2OOC1C2ON(=O)=O                   | 345.2 |
| BZMUa_NPHb  | O(C(=O)C1OC1C=CC=O)Oc1ccccc1N(=O)=O                            | 279.2 |
| BZMUa_PBZ   | O(C(=O)C1OC1C=CC=O)OC1C(=O)C=CC(=O)C1O                         | 282.2 |
| BZMUa_PHEN  | O(C(=O)C1OC1C=CC=O)OC1(O)C=CC2OOC1C2O                          | 300.2 |
| BZMUb_BZFU  | O=CC(O)C(OOC1C(O)COC1=O)C1OC1C=O                               | 276.2 |
| BZMUb_BZMUb | O=CC(O)C(OOC(C1OC1C=O)C(O)C=O)C1OC1C=O                         | 318.2 |
| BZMUb_C2a   | O=CC(O)C(OOC(=O)C=O)C1OC1C=O                                   | 232.1 |
| BZMUb_C2b   | O=CC(O)C(OOCC=O)C1OC1C=O                                       | 218.2 |
| BZMUb_C2c   | O=CC(O)C(OOC(=O)CO)C1OC1C=O                                    | 234.2 |
| BZMUb_C3a   | O=CC(O)C(OOC(C(=O)C(C=O)O))C1OC1C=O                            | 262.2 |
| BZMUb_C3DI  | O=CC(O)C(OOC(C=O)C=O)C1OC1C=O                                  | 246.2 |
| BZMUb_C4a   | O=CC(O)C(OOC(=O)C=CC(=O)C=O)C1OC1C=O                           | 286.2 |
| BZMUb_C5a   | O=CC(O)C(OOC(C(=O)C=CC(=O)C(C=O)O))C1OC1C=O                    | 316.2 |
| BZMUb_C5DI  | O=CC(O)C(OOC(C(C=O)C=CC=O))C1OC1C=O                            | 272.2 |
| BZMUb_C6a   | O=CC(O)C(OOc1ccccc1)C1OC1C=O                                   | 252.2 |
| BZMUb_CATE  | O=CC(O)C(OOc1ccccc1O)C1OC1C=O                                  | 268.2 |
| BZMUb_DNP   | O=CC(O)C(OOC1(O)C(=CC2(OOC1C2O)N(=O)=O)N(=O)=O)C1OC1C=O        | 408.2 |
| BZMUb_EPX   | O=CC(O)C(OOC(=O)C1OC1C=O)C1OC1C=O                              | 274.2 |
| BZMUb_MALa  | O=CC(O)C(OOC(=O)C=CC=O)C1OC1C=O                                | 258.2 |
| BZMUb_MALb  | O=CC(O)C(OOC(C=O)C(O)C=O)C1OC1C=O                              | 276.2 |
| BZMUb_MALc  | O=CC(O)C(OOC1C(=O)OC(=O)C1O)C1OC1C=O                           | 290.2 |
| BZMUb_NBZa  | O=CC(O)C(OOC1C(=O)OCC1ON(=O)=O)C1OC1C=O                        | 321.2 |
| BZMUb_NBZb  | O=CC(O)C(OOC1C(=O)C=CC(=O)C1ON(=O)=O)C1OC1C=O                  | 345.2 |
| BZMUb_NCAT  | O=CC(O)C(OOC1(O)C(=CC2(OOC1C2O)N(=O)=O)O)C1OC1C=O              | 379.2 |
| BZMUb_NDN   | O=CC(O)C(OOC1(O)C(=CC2(OOC1C2ON(=O)=O)N(=O)=O)N(=O)=O)C1OC1C=O | 453.2 |

|              |                                                                  |       |
|--------------|------------------------------------------------------------------|-------|
| BZMUb_NNC    | O=CC(O)C(OOC1(O)C(=CC2(OOC1C2ON(=O)=O)N(=O)=O)O)C1OC1C=O         | 424.2 |
| BZMUb_NPHa   | O=CC(O)C(OOC1(O)C=CC2OOC1C2ON(=O)=O)C1OC1C=O                     | 363.2 |
| BZMUb_NPHb   | O=CC(O)C(OOC1(O)C=CC2OOC1C2ON(=O)=O)C1OC1C=O                     | 297.2 |
| BZMUb_PBZ    | O=CC(O)C(OOC1C(=O)C=CC(=O)C1O)C1OC1C=O                           | 300.2 |
| BZMUb_PHEN   | O=CC(O)C(OOC1(O)C=CC2OOC1C2O)C1OC1C=O                            | 318.2 |
| BZo_O4_2OH   | O=CC(O)C(O)C1OC1C(O)=O                                           | 176.1 |
| BZo_O5_NO3   | O=CC(O)C(O)C1OC1C(ON(=O)=O)=O                                    | 221.1 |
| BZo_O5_O     | O=CC(=O)C(O)C1OC1C(O)=O                                          | 174.1 |
| BZo_O5_OOH   | O=CC(O)C(O)C1OC1C(OO)=O                                          | 192.1 |
| BZo_O6_2OH   | O=C(O)C(O)C(O)C1OC1C(OO)=O                                       | 208.1 |
| BZo_O7_NO3   | O=C(ON(=O)=O)C(O)C(O)C1OC1C(OO)=O                                | 253.1 |
| BZo_O7_O     | O=C(O)C(=O)C(O)C1OC1C(OO)=O                                      | 206.1 |
| BZo_O7_OOH   | O=C(OO)C(O)C(O)C1OC1C(OO)=O                                      | 224.1 |
| BZo_O8_2OH   | O=C(OO)C(O)C(O)C(=O)C(O)C(=O)OO                                  | 240.1 |
| BZo_O9_NO3   | O=C(OO)C(O)C(O)C(=O)C(ON(=O)=O)C(=O)OO                           | 285.1 |
| BZo_O9_O     | O=C(OO)C(O)C(O)C(=O)C(=O)C(=O)OO                                 | 238.1 |
| BZo_O9_OOH   | O=C(OO)C(O)C(O)C(=O)C(OO)C(=O)OO                                 | 256.1 |
| BZo_RO_O10   | O=C(OO)C(O)C(O)C(=O)C([O])C(=O)OO                                | 239.1 |
| BZo_RO_O6    | O=CC(O)C(O)C1OC1C([O])=O                                         | 175.1 |
| BZo_RO_O8    | O=C([O])C(O)C(O)C1OC1C(OO)=O                                     | 207.1 |
| BZo_RO2_O11  | O=C(OO)C(O)C(O)C(=O)C(O[O])C(=O)OO                               | 255.1 |
| BZo_RO2_O7   | O=CC(O)C(O)C1OC1C(O[O])=O                                        | 191.1 |
| BZo_RO2_O9   | O=C(O[O])C(O)C(O)C1OC1C(OO)=O                                    | 223.1 |
| BZo2_RO_O10  | O=C(OO)C(O)C(O)C(=O)C([O])C(=O)OO                                | 239.1 |
| BZo2_RO_O6   | O=CC(O)C(O)C1OC1C([O])=O                                         | 175.1 |
| BZo2_RO_O8   | O=C([O])C(O)C(O)C1OC1C(OO)=O                                     | 207.1 |
| BZOBIPEROH   | O=C1C=CC2OOC1C2O                                                 | 142.1 |
| BZoO10_10    | O=C(OO)C(O)C(O)C(=O)C(OO(C(C(=O)OO)C(=O)C(O)C(O)C(OO)=O))C(=O)OO | 478.2 |
| BZoO10_5     | O=C(OO)C(O)C(O)C(=O)C(OOC1C2OC2C3OOC1C3(O))C(=O)OO               | 398.2 |
| BZoO10_7     | O=C(OO)C(O)C(O)C(=O)C(OO(C(=O)C(O)C(O)C(OO)C=C=O))C(=O)OO        | 430.2 |
| BZoO10_9     | O=C(OO)C(O)C(O)C(=O)C(OO(C(C(O)C(=O)CC(OO)C(=O)OO)=O))C(=O)OO    | 462.2 |
| BZoO10_BZBI  | O=C(OO)C(O)C(O)C(=O)C(OOC1C=CC2OOC1C2O)C(=O)OO                   | 382.2 |
| BZoO10_BZFU  | O=C(OO)C(O)C(O)C(=O)C(OOC1C(O)COC1=O)C(=O)OO                     | 356.2 |
| BZoO10_BZMUa | O=C(OO)C(O)C(O)C(=O)C(OOC(=O)C1OC1C=CC=O)C(=O)OO                 | 380.2 |
| BZoO10_BZMUb | O=C(OO)C(O)C(O)C(=O)C(OO(C(C1OC1C=O)C(O)C=O))C(=O)OO             | 398.2 |
| BZoO10_C2a   | O=C(OO)C(O)C(O)C(=O)C(OOC(=O)C=O)C(=O)OO                         | 312.1 |
| BZoO10_C2b   | O=C(OO)C(O)C(O)C(=O)C(OOCC=O)C(=O)OO                             | 298.2 |
| BZoO10_C2c   | O=C(OO)C(O)C(O)C(=O)C(OO(C(=O)CO))C(=O)OO                        | 314.2 |
| BZoO10_C3a   | O=C(OO)C(O)C(O)C(=O)C(OO(C(=O)C(C=O)O))C(=O)OO                   | 342.2 |
| BZoO10_C3DI  | O=C(OO)C(O)C(O)C(=O)C(OOC(C=O)C=O)C(=O)OO                        | 326.2 |
| BZoO10_C4a   | O=C(OO)C(O)C(O)C(=O)C(OOC(=O)C=CC(=O)C=O)C(=O)OO                 | 366.2 |
| BZoO10_C5a   | O=C(OO)C(O)C(O)C(=O)C(OO(C(=O)C=CC(=O)C(C=O)O))C(=O)OO           | 396.2 |
| BZoO10_C5DI  | O=C(OO)C(O)C(O)C(=O)C(OO(C(C=O)C=CC=O))C(=O)OO                   | 352.2 |
| BZoO10_C5eO5 | O=C(OO)C(O)C(O)C(=O)C(OO(C(C(O)C(O)C=O)C=O))C(=O)OO              | 386.2 |
| BZoO10_C5eO7 | O=C(OO)C(O)C(O)C(=O)C(OO(C(=O)C(O)C(O)C(OO)C=O))C(=O)OO          | 418.2 |
| BZoO10_C5eO9 | O=C(OO)C(O)C(O)C(=O)C(OO(C(C(OO)C(O)C(O)C(OO)=O))C(=O)OO         | 450.2 |

|              |                                                                            |       |
|--------------|----------------------------------------------------------------------------|-------|
| BZo010_C506  | O=C(OO)C(O)C(O)C(=O)C(OOC(C(=O)C(O)C(O)C=COO))C(=O)OO                      | 402.2 |
| BZo010_C508  | O=C(OO)C(O)C(O)C(=O)C(OOC(C(O)C(O)C(O)C(=O)OO)=O))C(=O)OO                  | 434.2 |
| BZo010_C6a   | O=C(OO)C(O)C(O)C(=O)C(OOC1cccc1)C(=O)OO                                    | 332.2 |
| BZo010_CATE  | O=C(OO)C(O)C(O)C(=O)C(OOC1cccc1O)C(=O)OO                                   | 348.2 |
| BZo010_DNP   | O=C(OO)C(O)C(O)C(=O)C(OOC1(O)C(=CC2(OOC1C2O)N(=O)=O)N(=O)=O)C(=O)OO        | 488.2 |
| BZo010_EPX   | O=C(OO)C(O)C(O)C(=O)C(OOC(=O)C1OC1C=O)C(=O)OO                              | 354.2 |
| BZo010_MALa  | O=C(OO)C(O)C(O)C(=O)C(OOC(=O)C=CC=O)C(=O)OO                                | 338.2 |
| BZo010_MALb  | O=C(OO)C(O)C(O)C(=O)C(OOC(C=O)C(O)C=O)C(=O)OO                              | 356.2 |
| BZo010_MALc  | O=C(OO)C(O)C(O)C(=O)C(OOC1C(=O)OC(=O)C1O)C(=O)OO                           | 370.2 |
| BZo010_NBZa  | O=C(OO)C(O)C(O)C(=O)C(OOC1C(=O)OCC1ON(=O)=O)C(=O)OO                        | 401.2 |
| BZo010_NBZb  | O=C(OO)C(O)C(O)C(=O)C(OOC1C(=O)C=CC(=O)C1ON(=O)=O)C(=O)OO                  | 425.2 |
| BZo010_NCAT  | O=C(OO)C(O)C(O)C(=O)C(OOC1(O)C(=CC2(OOC1C2O)N(=O)=O)O)C(=O)OO              | 459.2 |
| BZo010_NDN   | O=C(OO)C(O)C(O)C(=O)C(OOC1(O)C(=CC2(OOC1C2ON(=O)=O)N(=O)=O)N(=O)=O)C(=O)OO | 533.2 |
| BZo010_NNC   | O=C(OO)C(O)C(O)C(=O)C(OOC1(O)C(=CC2(OOC1C2ON(=O)=O)N(=O)=O)O)C(=O)OO       | 504.2 |
| BZo010_NPHa  | O=C(OO)C(O)C(O)C(=O)C(OOC1(O)C=CC2OOC1C2ON(=O)=O)C(=O)OO                   | 443.2 |
| BZo010_NPHb  | O=C(OO)C(O)C(O)C(=O)C(OOC1cccc1N(=O)=O)C(=O)OO                             | 377.2 |
| BZo010_PBZ   | O=C(OO)C(O)C(O)C(=O)C(OOC1C(=O)C=CC(=O)C1O)C(=O)OO                         | 380.2 |
| BZo010_PHEN  | O=C(OO)C(O)C(O)C(=O)C(OOC1(O)C=CC2OOC1C2O)C(=O)OO                          | 398.2 |
| BZo06_BZBI   | O=CC(O)C(O)C1OC1C(=O)(OOC1C=CC2OOC1C2O)                                    | 318.2 |
| BZo06_BZeo05 | O=CC(O)C(O)C1OC1C(=O)(OOC1C2OC2C3OOC1C3(O))                                | 334.2 |
| BZo06_BZeo07 | O=CC(O)C(O)C1OC1C(=O)(OO(C(=O)C(O)C(O)C(OO)C=C=O))                         | 366.2 |
| BZo06_BZeo09 | O=CC(O)C(O)C1OC1C(=O)(OO(C(O)C(O)C(=O)CC(OO)C(=O)OO)=O))                   | 398.2 |
| BZo06_BZFU   | O=CC(O)C(O)C1OC1C(=O)(OOC1C(O)COC1=O)                                      | 292.2 |
| BZo06_BZMUa  | O=CC(O)C(O)C1OC1C(=O)(OOC(=O)C1OC1C=CC=O)                                  | 316.2 |
| BZo06_BZMUb  | O=CC(O)C(O)C1OC1C(=O)(OO(C(C1OC1C=O)C(O)C=O))                              | 334.2 |
| BZo06_BZo010 | O=CC(O)C(O)C1OC1C(=O)(OO(C(C(=O)OO)C(=O)C(O)C(O)C(OO)=O))                  | 414.2 |
| BZo06_BZo06  | O=CC(O)C(O)C1OC1C(=O)(OO(C(=O)C1OC1C(O)C(O)C=O))                           | 350.2 |
| BZo06_BZo08  | O=CC(O)C(O)C1OC1C(=O)(OO(C(O)C(O)C(O)C1OC1C(OO)=O)=O))                     | 382.2 |
| BZo06_C2a    | O=CC(O)C(O)C1OC1C(=O)(OOC(=O)C=O)                                          | 248.1 |
| BZo06_C2b    | O=CC(O)C(O)C1OC1C(=O)(OOC(=O)C=O)                                          | 234.2 |
| BZo06_C2c    | O=CC(O)C(O)C1OC1C(=O)(OO(C(=O)CO))                                         | 250.2 |
| BZo06_C3a    | O=CC(O)C(O)C1OC1C(=O)(OO(C(=O)C(C=O)O))                                    | 278.2 |
| BZo06_C3DI   | O=CC(O)C(O)C1OC1C(=O)(OOC(C=O)C=O)                                         | 262.2 |
| BZo06_C4a    | O=CC(O)C(O)C1OC1C(=O)(OOC(=O)C=CC(=O)C=O)                                  | 302.2 |
| BZo06_C5a    | O=CC(O)C(O)C1OC1C(=O)(OO(C(=O)C=CC(=O)C(C=O)O))                            | 332.2 |
| BZo06_C5DI   | O=CC(O)C(O)C1OC1C(=O)(OO(C(C=O)C=CC=O))                                    | 288.2 |
| BZo06_C5e05  | O=CC(O)C(O)C1OC1C(=O)(OO(C(O)C(O)C(O)C=O)C=O))                             | 322.2 |
| BZo06_C5e07  | O=CC(O)C(O)C1OC1C(=O)(OO(C(=O)C(O)C(O)C(OO)C=O))                           | 354.2 |
| BZo06_C5e09  | O=CC(O)C(O)C1OC1C(=O)(OO(C(C(OO)C(O)C(O)C(OO)=O)=O))                       | 386.2 |
| BZo06_C506   | O=CC(O)C(O)C1OC1C(=O)(OO(C(=O)C(O)C(O)C=COO))                              | 338.2 |
| BZo06_C508   | O=CC(O)C(O)C1OC1C(=O)(OO(C(O)C(O)C(O)C(=O)OO)=O))                          | 370.2 |
| BZo06_C6a    | O=CC(O)C(O)C1OC1C(=O)(OOC1cccc1)                                           | 268.2 |
| BZo06_CATE   | O=CC(O)C(O)C1OC1C(=O)(OOC1cccc1O)                                          | 284.2 |
| BZo06_DNP    | O=CC(O)C(O)C1OC1C(=O)(OOC1(O)C(=CC2(OOC1C2O)N(=O)=O)N(=O)=O)               | 424.2 |
| BZo06_EPX    | O=CC(O)C(O)C1OC1C(=O)(OOC(=O)C1OC1C=O)                                     | 290.2 |
| BZo06_MALa   | O=CC(O)C(O)C1OC1C(=O)(OOC(=O)C=CC=O)                                       | 274.2 |

|              |                                                                       |       |
|--------------|-----------------------------------------------------------------------|-------|
| BZo06_MALb   | O=CC(O)C(O)C1OC1C(=O)(OOC(C=O)C(O)C=O)                                | 292.2 |
| BZo06_MALc   | O=CC(O)C(O)C1OC1C(=O)(OOC1C(=O)OC(=O)C1O)                             | 306.2 |
| BZo06_NBZa   | O=CC(O)C(O)C1OC1C(=O)(OOC1C(=O)OCC1ON(=O)=O)                          | 337.2 |
| BZo06_NBZb   | O=CC(O)C(O)C1OC1C(=O)(OOC1C(=O)C=CC(=O)C1ON(=O)=O)                    | 361.2 |
| BZo06_NCAT   | O=CC(O)C(O)C1OC1C(=O)(OOC1(O)C(=CC2(OOC1C2O)N(=O)=O)O)                | 395.2 |
| BZo06_NDN    | O=CC(O)C(O)C1OC1C(=O)(OOC1(O)C(=CC2(OOC1C2ON(=O)=O)N(=O)=O)N(=O)=O)   | 469.2 |
| BZo06_NNC    | O=CC(O)C(O)C1OC1C(=O)(OOC1(O)C(=CC2(OOC1C2ON(=O)=O)N(=O)=O)O)         | 440.2 |
| BZo06_NPHa   | O=CC(O)C(O)C1OC1C(=O)(OOC1(O)C=CC2OOC1C2ON(=O)=O)                     | 379.2 |
| BZo06_NPHb   | O=CC(O)C(O)C1OC1C(=O)(OOC1C(=O)N(=O)=O)                               | 313.2 |
| BZo06_PBZ    | O=CC(O)C(O)C1OC1C(=O)(OOC1C(=O)C=CC(=O)C1O)                           | 316.2 |
| BZo06_PHEN   | O=CC(O)C(O)C1OC1C(=O)(OOC1(O)C=CC2OOC1C2O)                            | 334.2 |
| BZo08_BZBI   | O=C(OOC1C=CC2OOC1C2O)C(O)C(O)C1OC1C(OO)=O                             | 350.2 |
| BZo08_BZeo05 | O=C(OOC1C2OC2C3OOC1C3(O))C(O)C(O)C1OC1C(OO)=O                         | 366.2 |
| BZo08_BZeo07 | O=C(OOC(C(=O)C(O)C(O)C(OO)C=C=O))C(O)C(O)C1OC1C(OO)=O                 | 398.2 |
| BZo08_BZeo09 | O=C(OOC(C(C(O)C(=O)CC(OO)C(=O)OO)=O))C(O)C(O)C1OC1C(OO)=O             | 430.2 |
| BZo08_BZFU   | O=C(OOC1C(O)COC1=O)C(O)C(O)C1OC1C(OO)=O                               | 324.2 |
| BZo08_BZMUa  | O=C(OOC(=O)C1OC1C=CC=O)C(O)C(O)C1OC1C(OO)=O                           | 348.2 |
| BZo08_BZMUb  | O=C(OOC(C1OC1C=O)C(O)C=O)C(O)C(O)C1OC1C(OO)=O                         | 366.2 |
| BZo08_BZo010 | O=C(OOC(C(C(=O)OO)C(=O)C(O)C(O)C(OO)=O))C(O)C(O)C1OC1C(OO)=O          | 446.2 |
| BZo08_BZo08  | O=C(OOC(C(C(O)C(O)C1OC1C(OO)=O)=O))C(O)C(O)C1OC1C(OO)=O               | 414.2 |
| BZo08_C2a    | O=C(OOC(=O)C=O)C(O)C(O)C1OC1C(OO)=O                                   | 280.1 |
| BZo08_C2b    | O=C(OOCC=O)C(O)C(O)C1OC1C(OO)=O                                       | 266.2 |
| BZo08_C2c    | O=C(OOC(C(=O)CO))C(O)C(O)C1OC1C(OO)=O                                 | 282.2 |
| BZo08_C3a    | O=C(OOC(C(=O)C(C=O)O))C(O)C(O)C1OC1C(OO)=O                            | 310.2 |
| BZo08_C3DI   | O=C(OOC(C=O)C=O)C(O)C(O)C1OC1C(OO)=O                                  | 294.2 |
| BZo08_C4a    | O=C(OOC(=O)C=CC(=O)C=O)C(O)C(O)C1OC1C(OO)=O                           | 334.2 |
| BZo08_C5a    | O=C(OOC(C(=O)C=CC(=O)C(C=O)O))C(O)C(O)C1OC1C(OO)=O                    | 364.2 |
| BZo08_C5DI   | O=C(OOC(C(C=O)C=CC=O))C(O)C(O)C1OC1C(OO)=O                            | 320.2 |
| BZo08_C5e05  | O=C(OOC(C(C(O)C(O)C=O)C=O))C(O)C(O)C1OC1C(OO)=O                       | 354.2 |
| BZo08_C5e07  | O=C(OOC(C(=O)C(O)C(O)C(OO)C=O))C(O)C(O)C1OC1C(OO)=O                   | 386.2 |
| BZo08_C5e09  | O=C(OOC(C(C(OO)C(O)C(O)C(OO)=O)=O))C(O)C(O)C1OC1C(OO)=O               | 418.2 |
| BZo08_C5O6   | O=C(OOC(C(=O)C(O)C(O)C=COO))C(O)C(O)C1OC1C(OO)=O                      | 370.2 |
| BZo08_C5O8   | O=C(OOC(C(C(O)C(O)C(O)C(=O)OO)=O))C(O)C(O)C1OC1C(OO)=O                | 402.2 |
| BZo08_C6a    | O=C(OOC1C(=O)OC(=O)C1O)C(O)C(O)C1OC1C(OO)=O                           | 300.2 |
| BZo08_CATE   | O=C(OOC1C(=O)OCC1ON(=O)=O)C(O)C(O)C1OC1C(OO)=O                        | 316.2 |
| BZo08_DNP    | O=C(OOC1(O)C(=CC2(OOC1C2O)N(=O)=O)N(=O)=O)C(O)C(O)C1OC1C(OO)=O        | 456.2 |
| BZo08_EPX    | O=C(OOC(=O)C1OC1C=O)C(O)C(O)C1OC1C(OO)=O                              | 322.2 |
| BZo08_MALa   | O=C(OOC(=O)C=CC=O)C(O)C(O)C1OC1C(OO)=O                                | 306.2 |
| BZo08_MALb   | O=C(OOC(C=O)C(O)C=O)C(O)C(O)C1OC1C(OO)=O                              | 324.2 |
| BZo08_MALc   | O=C(OOC1C(=O)OC(=O)C1O)C(O)C(O)C1OC1C(OO)=O                           | 338.2 |
| BZo08_NBZa   | O=C(OOC1C(=O)OCC1ON(=O)=O)C(O)C(O)C1OC1C(OO)=O                        | 369.2 |
| BZo08_NBZb   | O=C(OOC1C(=O)C=CC(=O)C1ON(=O)=O)C(O)C(O)C1OC1C(OO)=O                  | 393.2 |
| BZo08_NCAT   | O=C(OOC1(O)C(=CC2(OOC1C2O)N(=O)=O)O)C(O)C(O)C1OC1C(OO)=O              | 427.2 |
| BZo08_NDN    | O=C(OOC1(O)C(=CC2(OOC1C2ON(=O)=O)N(=O)=O)N(=O)=O)C(O)C(O)C1OC1C(OO)=O | 501.2 |
| BZo08_NNC    | O=C(OOC1(O)C(=CC2(OOC1C2ON(=O)=O)N(=O)=O)O)C(O)C(O)C1OC1C(OO)=O       | 472.2 |
| BZo08_NPHa   | O=C(OOC1(O)C=CC2OOC1C2ON(=O)=O)C(O)C(O)C1OC1C(OO)=O                   | 411.2 |

|              |                                                        |       |
|--------------|--------------------------------------------------------|-------|
| BZoO8_NPHb   | O=C(OOc1ccccc1N(=O)=O)C(O)C(O)C1OC1C(OO)=O             | 345.2 |
| BZoO8_PBZ    | O=C(OOC1C(=O)C=CC(=O)C1O)C(O)C(O)C1OC1C(OO)=O          | 348.2 |
| BZoO8_PHEN   | O=C(OOC1(O)C=CC2OOC1C2O)C(O)C(O)C1OC1C(OO)=O           | 366.2 |
| BZouni_O10_O | O=C(OO)C(=O)C(O)C(=O)C(OO)C(=O)OO                      | 254.1 |
| BZouni_O6_O  | O=CC(=O)C(O)C1OC1C(OO)=O                               | 190.1 |
| BZouni_O8_O  | O=C(OO)C(=O)C(O)C1OC1C(OO)=O                           | 222.1 |
| C2a_C2a      | O(C(=O)C=O)OC(=O)C=O                                   | 146.1 |
| C2a_C2b      | O(C(=O)C=O)OCC=O                                       | 132.1 |
| C2a_C2c      | OCC(=O)(OOC(=O)C=O)                                    | 148.1 |
| C2a_C4a      | O(C(=O)C=O)OC(=O)C=CC(=O)C=O                           | 200.1 |
| C2a_C5a      | OC(C=O)C(=O)C=CC(=O)(OOC(=O)C=O)                       | 230.1 |
| C2a_DNP      | O(C(=O)C=O)OC1(O)C(=CC2(OOC1C2O)N(=O)=O)N(=O)=O        | 322.1 |
| C2a_MALc     | O(C(=O)C=O)OC1C(=O)OC(=O)C1O                           | 204.1 |
| C2a_NBZb     | O(C(=O)C=O)OC1C(=O)C=CC(=O)C1ON(=O)=O                  | 259.1 |
| C2a_NCAT     | O(C(=O)C=O)OC1(O)C(=CC2(OOC1C2O)N(=O)=O)O              | 293.1 |
| C2a_NDN      | O(C(=O)C=O)OC1(O)C(=CC2(OOC1C2ON(=O)=O)N(=O)=O)N(=O)=O | 367.1 |
| C2a_NNC      | O(C(=O)C=O)OC1(O)C(=CC2(OOC1C2ON(=O)=O)N(=O)=O)O       | 338.1 |
| C2a_NPHb     | O(C(=O)C=O)Oc1ccccc1N(=O)=O                            | 211.1 |
| C2a_PBZ      | O(C(=O)C=O)OC1C(=O)C=CC(=O)C1O                         | 214.1 |
| C2b_C2b      | O(CC=O)OCC=O                                           | 118.1 |
| C2b_C2c      | OCC(=O)(O OCC=O)                                       | 134.1 |
| C2b_C4a      | O(CC=O)OC(=O)C=CC(=O)C=O                               | 186.1 |
| C2b_C5a      | OC(C=O)C(=O)C=CC(=O)(O OCC=O)                          | 216.1 |
| C2b_DNP      | O(CC=O)OC1(O)C(=CC2(OOC1C2O)N(=O)=O)N(=O)=O            | 308.2 |
| C2b_MALc     | O(CC=O)OC1C(=O)OC(=O)C1O                               | 190.1 |
| C2b_NBZb     | O(CC=O)OC1C(=O)C=CC(=O)C1ON(=O)=O                      | 245.1 |
| C2b_NCAT     | O(CC=O)OC1(O)C(=CC2(OOC1C2O)N(=O)=O)O                  | 279.2 |
| C2b_NDN      | O(CC=O)OC1(O)C(=CC2(OOC1C2ON(=O)=O)N(=O)=O)N(=O)=O     | 353.2 |
| C2b_NNC      | O(CC=O)OC1(O)C(=CC2(OOC1C2ON(=O)=O)N(=O)=O)O           | 324.2 |
| C2b_NPHb     | O(CC=O)Oc1ccccc1N(=O)=O                                | 197.1 |
| C2b_PBZ      | O(CC=O)OC1C(=O)C=CC(=O)C1O                             | 200.2 |
| C2c_C2c      | OCC(=O)(OO(C(=O)CO))                                   | 150.1 |
| C2c_C4a      | OCC(=O)(OOC(=O)C=CC(=O)C=O)                            | 202.1 |
| C2c_C5a      | OCC(=O)(OO(C(=O)C=CC(=O)C(C=O)O))                      | 232.1 |
| C2H4         | C=C                                                    | 28.1  |
| C2OHOCO2H    | OCC(O)C(=O)O                                           | 106.1 |
| C2OHOCO2H    | OCC(O)C(=O)OO                                          | 122.1 |
| C32OH13CO    | O=CC(O)C=O                                             | 88.1  |
| C33CO        | O=CC(=O)C=O                                            | 86.0  |
| C3a_C2a      | OC(C=O)C(=O)(OOC(=O)C=O)                               | 176.1 |
| C3a_C2b      | OC(C=O)C(=O)(O OCC=O)                                  | 162.1 |
| C3a_C2c      | OC(C=O)C(=O)(OO(C(=O)CO))                              | 178.1 |
| C3a_C3a      | OC(C=O)C(=O)(OO(C(=O)C(C=O)O))                         | 206.1 |
| C3a_C4a      | OC(C=O)C(=O)(OOC(=O)C=CC(=O)C=O)                       | 230.1 |
| C3a_C5a      | OC(C=O)C(=O)(OO(C(=O)C=CC(=O)C(C=O)O))                 | 260.2 |
| C3a_CATE     | OC(C=O)C(=O)(OOC1ccccc1O)                              | 212.2 |

|            |                                                            |       |
|------------|------------------------------------------------------------|-------|
| C3a_DNP    | OC(C=O)C(=O)(OOC1(O)C(=CC2(OOC1C2O)N(=O)=O)N(=O)=O)        | 352.2 |
| C3a_MALc   | OC(C=O)C(=O)(OOC1C(=O)OC(=O)C1O)                           | 234.1 |
| C3a_NBZb   | OC(C=O)C(=O)(OOC1C(=O)C=CC(=O)C1ON(=O)=O)                  | 289.2 |
| C3a_NCAT   | OC(C=O)C(=O)(OOC1(O)C(=CC2(OOC1C2O)N(=O)=O)O)              | 323.2 |
| C3a_NDN    | OC(C=O)C(=O)(OOC1(O)C(=CC2(OOC1C2ON(=O)=O)N(=O)=O)N(=O)=O) | 397.2 |
| C3a_NNC    | OC(C=O)C(=O)(OOC1(O)C(=CC2(OOC1C2ON(=O)=O)N(=O)=O)O)       | 368.2 |
| C3a_NPHb   | OC(C=O)C(=O)(OOC1cccc1N(=O)=O)                             | 241.2 |
| C3a_PBZ    | OC(C=O)C(=O)(OOC1C(=O)C=CC(=O)C1O)                         | 244.2 |
| C3DI_BZFU  | O(C(C=O)C=O)OC1C(O)COC1=O                                  | 204.1 |
| C3DI_C2a   | O(C(C=O)C=O)OC(=O)C=O                                      | 160.1 |
| C3DI_C2b   | O(C(C=O)C=O)OCC=O                                          | 146.1 |
| C3DI_C2c   | OCC(=O)(OOC(C=O)C=O)                                       | 162.1 |
| C3DI_C3a   | OC(C=O)C(=O)(OOC(C=O)C=O)                                  | 190.1 |
| C3DI_C3DI  | O(C(C=O)C=O)OC(C=O)C=O                                     | 174.1 |
| C3DI_C4a   | O(C(C=O)C=O)OC(=O)C=CC(=O)C=O                              | 214.1 |
| C3DI_C5a   | OC(C=O)C(=O)C=CC(=O)(OOC(C=O)C=O)                          | 244.2 |
| C3DI_C6a   | O(C(C=O)C=O)Oe1cccc1                                       | 180.2 |
| C3DI_CATE  | O(C(C=O)C=O)Oe1cccc1O                                      | 196.2 |
| C3DI_DNP   | O(C(C=O)C=O)OC1(O)C(=CC2(OOC1C2O)N(=O)=O)N(=O)=O           | 336.2 |
| C3DI_MALb  | O(C(C=O)C=O)OC(C=O)C(O)C=O                                 | 204.1 |
| C3DI_MALc  | O(C(C=O)C=O)OC1C(=O)OC(=O)C1O                              | 218.1 |
| C3DI_NBZa  | O(C(C=O)C=O)OC1C(=O)OCC1ON(=O)=O                           | 249.1 |
| C3DI_NBZb  | O(C(C=O)C=O)OC1C(=O)C=CC(=O)C1ON(=O)=O                     | 273.2 |
| C3DI_NCAT  | O(C(C=O)C=O)OC1(O)C(=CC2(OOC1C2O)N(=O)=O)O                 | 307.2 |
| C3DI_NDN   | O(C(C=O)C=O)OC1(O)C(=CC2(OOC1C2ON(=O)=O)N(=O)=O)N(=O)=O    | 381.2 |
| C3DI_NNC   | O(C(C=O)C=O)OC1(O)C(=CC2(OOC1C2ON(=O)=O)N(=O)=O)O          | 352.2 |
| C3DI_NPHb  | O(C(C=O)C=O)Oe1cccc1N(=O)=O                                | 225.2 |
| C3DI_PBZ   | O(C(C=O)C=O)OC1C(=O)C=CC(=O)C1O                            | 228.2 |
| C3DIALO    | O=CC([O])C=O                                               | 87.1  |
| C3DIALO2   | [O]OC(C=O)C=O                                              | 103.1 |
| C3DIALOOH  | OOC(C=O)C=O                                                | 104.1 |
| C3DIOLO    | OCC(O)C[O]                                                 | 91.1  |
| C3DIOLO2   | [O]OCC(O)CO                                                | 107.1 |
| C3DIOLOOH  | OCC(O)CO                                                   | 108.1 |
| C42AOH     | O=CC(O)CON(=O)=O                                           | 135.1 |
| C4a_C4a    | O(C(=O)C=CC(=O)C=O)OC(=O)C=CC(=O)C=O                       | 254.2 |
| C4CO2DBC03 | [O]OC(=O)C=CC(=O)C=O                                       | 143.1 |
| C4CO2DBPAN | O=CC(=O)C=CC(=O)OON(=O)=O                                  | 189.1 |
| C4CO2DCO3H | OOC(=O)C=CC(=O)C=O                                         | 144.1 |
| C5_04_2OH  | OOC=CC(O)C(O)C(=O)O                                        | 164.1 |
| C5_05_NO3  | OOC=CC(O)C(O)C(=O)ON(=O)=O                                 | 209.1 |
| C5_05_O    | OOC=CC(=O)C(O)C(=O)O                                       | 162.1 |
| C5_05_OOH  | OOC=CC(O)C(O)C(=O)OO                                       | 180.1 |
| C5_06_2OH  | O=C(O)C(O)C(O)C(O)C(=O)OO                                  | 196.1 |
| C5_07_NO3  | O=C(ON(=O)=O)C(O)C(O)C(O)C(=O)OO                           | 241.1 |
| C5_07_O    | O=C(O)C(=O)C(O)C(O)C(=O)OO                                 | 194.1 |

|            |                                                          |       |
|------------|----------------------------------------------------------|-------|
| C5_07_OOH  | O=C(OO)C(O)C(O)C(O)C(=O)OO                               | 212.1 |
| C5_RO_O5   | O=CC([O])C(O)C(O)C=O                                     | 147.1 |
| C5_RO_O6   | OOC=CC(O)C(O)C(=O)[O]                                    | 163.1 |
| C5_RO_O7   | O=CC(OO)C(O)C(O)C([O])=O                                 | 179.1 |
| C5_RO_O8   | O=C([O])C(O)C(O)C(O)C(=O)OO                              | 195.1 |
| C5_RO_O9   | O=C([O])C(OO)C(O)C(O)C(OO)=O                             | 211.1 |
| C5_RO2_O10 | O=C([O])C(OO)C(O)C(O)C(OO)=O                             | 227.1 |
| C5_RO2_O6  | O=CC(O[O])C(O)C(O)C=O                                    | 163.1 |
| C5_RO2_O7  | OOC=CC(O)C(O)C(=O)O[O]                                   | 179.1 |
| C5_RO2_O8  | O=CC(OO)C(O)C(O)C(O[O])=O                                | 195.1 |
| C5_RO2_O9  | O=C(O[O])C(O)C(O)C(O)C(=O)OO                             | 211.1 |
| C5a_C4a    | OC(C=O)C(=O)C=CC(=O)(OOC(=O)C=CC(=O)C=O)                 | 284.2 |
| C5a_C5a    | OC(C=O)C(=O)C=CC(=O)(OO(C(=O)C=CC(=O)C(C=O)O))           | 314.2 |
| C5CO2OHC03 | OC(C=O)C(=O)C=CC(=O)O[O]                                 | 173.1 |
| C5CO2OHPAN | O=CC(O)C(=O)C=CC(=O)OON(=O)=O                            | 219.1 |
| C5COOHCO3H | OC(C=O)C(=O)C=CC(=O)OO                                   | 174.1 |
| C5DI_BZFU  | O=CC=CC(OOC1C(O)COC1=O)C=O                               | 230.2 |
| C5DI_C2a   | O=CC=CC(OOC(=O)C=O)C=O                                   | 186.1 |
| C5DI_C2b   | O=CC=CC(OOCC=O)C=O                                       | 172.1 |
| C5DI_C2c   | O=CC=CC(OO(C(=O)CO))C=O                                  | 188.1 |
| C5DI_C3a   | O=CC=CC(OO(C(=O)C(C=O)O))C=O                             | 216.1 |
| C5DI_C3DI  | O=CC=CC(OOC(C=O)C=O)C=O                                  | 200.2 |
| C5DI_C4a   | O=CC=CC(OOC(=O)C=CC(=O)C=O)C=O                           | 240.2 |
| C5DI_C5a   | O=CC=CC(OO(C(=O)C=CC(=O)C(C=O)O))C=O                     | 270.2 |
| C5DI_C5DI  | O=CC=CC(OO(C(C=O)C=CC=O))C=O                             | 226.2 |
| C5DI_C6a   | O=CC=CC(OOe1cccc1)C=O                                    | 206.2 |
| C5DI_CATE  | O=CC=CC(OOe1cccc1O)C=O                                   | 222.2 |
| C5DI_DNP   | O=CC=CC(OOC1(O)C(=CC2(OOC1C2O)N(=O)=O)N(=O)=O)C=O        | 362.2 |
| C5DI_EPX   | O=CC=CC(OOC(=O)C1OC1C=O)C=O                              | 228.2 |
| C5DI_MALa  | O=CC=CC(OOC(=O)C=CC=O)C=O                                | 212.2 |
| C5DI_MALb  | O=CC=CC(OOC(C=O)C(O)C=O)C=O                              | 230.2 |
| C5DI_MALc  | O=CC=CC(OOC1C(=O)OC(=O)C1O)C=O                           | 244.2 |
| C5DI_NBZa  | O=CC=CC(OOC1C(=O)OCC1ON(=O)=O)C=O                        | 275.2 |
| C5DI_NBZb  | O=CC=CC(OOC1C(=O)C=CC(=O)C1ON(=O)=O)C=O                  | 299.2 |
| C5DI_NCAT  | O=CC=CC(OOC1(O)C(=CC2(OOC1C2O)N(=O)=O)O)C=O              | 333.2 |
| C5DI_NDN   | O=CC=CC(OOC1(O)C(=CC2(OOC1C2ON(=O)=O)N(=O)=O)N(=O)=O)C=O | 407.2 |
| C5DI_NNC   | O=CC=CC(OOC1(O)C(=CC2(OOC1C2ON(=O)=O)N(=O)=O)O)C=O       | 378.2 |
| C5DI_NPHa  | O=CC=CC(OOC1(O)C=CC2OOC1C2ON(=O)=O)C=O                   | 317.2 |
| C5DI_NPHb  | O=CC=CC(OOe1cccc1N(=O)=O)C=O                             | 251.2 |
| C5DI_PBZ   | O=CC=CC(OOC1C(=O)C=CC(=O)C1O)C=O                         | 254.2 |
| C5DI_PHEN  | O=CC=CC(OOC1(O)C=CC2OOC1C2O)C=O                          | 272.2 |
| C5DIALCO   | O=CC=CC(=O)C=O                                           | 112.1 |
| C5DIALO    | O=CC=CC([O])C=O                                          | 113.1 |
| C5DIALO2   | O=CC=CC(O[O])C=O                                         | 129.1 |
| C5DIALOH   | O=CC=CC(O)C=O                                            | 114.1 |
| C5DIALOOH  | O=CC=CC(OO)C=O                                           | 130.1 |

|             |                                                               |       |
|-------------|---------------------------------------------------------------|-------|
| C5e_03_2OH  | O=CC(O)C(O)C(O)C=O                                            | 148.1 |
| C5e_04_NO3  | O=CC(ON(=O)=O)C(O)C(O)C=O                                     | 193.1 |
| C5e_04_O    | O=CC(=O)C(O)C(O)C=O                                           | 146.1 |
| C5e_04_OOH  | O=CC(OO)C(O)C(O)C=O                                           | 164.1 |
| C5e_05_2OH  | O=CC(OO)C(O)C(O)C(O)=O                                        | 180.1 |
| C5e_06_NO3  | O=CC(OO)C(O)C(O)C(ON(=O)=O)=O                                 | 225.1 |
| C5e_06_O    | O=CC(OO)C(=O)C(O)C(O)=O                                       | 178.1 |
| C5e_06_OOH  | O=CC(OO)C(O)C(O)C(OO)=O                                       | 196.1 |
| C5e_07_2OH  | O=C(O)C(OO)C(O)C(O)C(OO)=O                                    | 212.1 |
| C5e_08_NO3  | O=C(ON(=O)=O)C(OO)C(O)C(O)C(OO)=O                             | 257.1 |
| C5e_08_O    | O=C(O)C(OO)C(=O)C(O)C(OO)=O                                   | 210.1 |
| C5e_08_OOH  | O=C(OO)C(OO)C(O)C(O)C(OO)=O                                   | 228.1 |
| C5e05_BZBI  | O=CC(OOC1C=CC2OOC1C2O)C(O)C(O)C=O                             | 290.2 |
| C5e05_BZFU  | O=CC(OOC1C(O)COC1=O)C(O)C(O)C=O                               | 264.2 |
| C5e05_BZMUa | O=CC(OOC(=O)C1OC1C=CC=O)C(O)C(O)C=O                           | 288.2 |
| C5e05_BZMUb | O=CC(OO(C(C1OC1C=O)C(O)C=O))C(O)C(O)C=O                       | 306.2 |
| C5e05_C2a   | O=CC(OOC(=O)C=O)C(O)C(O)C=O                                   | 220.1 |
| C5e05_C2b   | O=CC(OOCC=O)C(O)C(O)C=O                                       | 206.2 |
| C5e05_C2c   | O=CC(OO(C(=O)CO)C(O)C(O)C=O                                   | 222.2 |
| C5e05_C3a   | O=CC(OO(C(=O)C(C=O)O))C(O)C(O)C=O                             | 250.2 |
| C5e05_C3DI  | O=CC(OOC(C=O)C=O)C(O)C(O)C=O                                  | 234.2 |
| C5e05_C4a   | O=CC(OOC(=O)C=CC(=O)C=O)C(O)C(O)C=O                           | 274.2 |
| C5e05_C5a   | O=CC(OO(C(=O)C=CC(=O)C(C=O)O))C(O)C(O)C=O                     | 304.2 |
| C5e05_C5DI  | O=CC(OO(C(C=O)C=CC=O))C(O)C(O)C=O                             | 260.2 |
| C5e05_C5e05 | O=CC(OO(C(C(O)C(O)C=O)C=O))C(O)C(O)C=O                        | 294.2 |
| C5e05_C5e07 | O=CC(OO(C(=O)C(O)C(O)C(OO)C=O))C(O)C(O)C=O                    | 326.2 |
| C5e05_C5e09 | O=CC(OO(C(C(OO)C(O)C(O)C(OO)=O)=O))C(O)C(O)C=O                | 358.2 |
| C5e05_C5O6  | O=CC(OO(C(=O)C(O)C(O)C=C(OO))C(O)C(O)C=O                      | 310.2 |
| C5e05_C5O8  | O=CC(OO(C(C(O)C(O)C(O)C(=O)OO)=O))C(O)C(O)C=O                 | 342.2 |
| C5e05_C6a   | O=CC(OOe1ccccc1)C(O)C(O)C=O                                   | 240.2 |
| C5e05_CATE  | O=CC(OOe1ccccc1O)C(O)C(O)C=O                                  | 256.2 |
| C5e05_DNP   | O=CC(OOC1(O)C(=CC2(OOC1C2O)N(=O)=O)N(=O)=O)C(O)C(O)C=O        | 396.2 |
| C5e05_EPX   | O=CC(OOC(=O)C1OC1C=O)C(O)C(O)C=O                              | 262.2 |
| C5e05_MALa  | O=CC(OOC(=O)C=CC=O)C(O)C(O)C=O                                | 246.2 |
| C5e05_MALb  | O=CC(OOC(C=O)C(O)C=O)C(O)C(O)C=O                              | 264.2 |
| C5e05_MALc  | O=CC(OOC1C(=O)OC(=O)C1O)C(O)C(O)C=O                           | 278.2 |
| C5e05_NBZa  | O=CC(OOC1C(=O)OCC1ON(=O)=O)C(O)C(O)C=O                        | 309.2 |
| C5e05_NBZb  | O=CC(OOC1C(=O)C=CC(=O)C1ON(=O)=O)C(O)C(O)C=O                  | 333.2 |
| C5e05_NCAT  | O=CC(OOC1(O)C(=CC2(OOC1C2O)N(=O)=O)O)C(O)C(O)C=O              | 367.2 |
| C5e05_NDN   | O=CC(OOC1(O)C(=CC2(OOC1C2ON(=O)=O)N(=O)=O)N(=O)=O)C(O)C(O)C=O | 441.2 |
| C5e05_NNC   | O=CC(OOC1(O)C(=CC2(OOC1C2ON(=O)=O)N(=O)=O)O)C(O)C(O)C=O       | 412.2 |
| C5e05_NPHa  | O=CC(OOC1(O)C=CC2OOC1C2ON(=O)=O)C(O)C(O)C=O                   | 351.2 |
| C5e05_NPHb  | O=CC(OOe1ccccc1N(=O)=O)C(O)C(O)C=O                            | 285.2 |
| C5e05_PBZ   | O=CC(OOC1C(=O)C=CC(=O)C1O)C(O)C(O)C=O                         | 288.2 |
| C5e05_PHEN  | O=CC(OOC1(O)C=CC2OOC1C2O)C(O)C(O)C=O                          | 306.2 |
| C5e07_BZBI  | O=CC(OO)C(O)C(O)C(=O)(OOC1C=CC2OOC1C2O)                       | 322.2 |

|             |                                                                     |       |
|-------------|---------------------------------------------------------------------|-------|
| C5e07_BZFU  | O=CC(OO)C(O)C(O)C(=O)(OOC1C(O)COC1=O)                               | 296.2 |
| C5e07_BZMUa | O=CC(OO)C(O)C(O)C(=O)(OOC(=O)C1OC1C=CC=O)                           | 320.2 |
| C5e07_BZMUb | O=CC(OO)C(O)C(O)C(=O)(OO(C(C1OC1C=O)C(O)C=O))                       | 338.2 |
| C5e07_C2a   | O=CC(OO)C(O)C(O)C(=O)(OOC(=O)C=O)                                   | 252.1 |
| C5e07_C2b   | O=CC(OO)C(O)C(O)C(=O)(OOC=O)                                        | 238.2 |
| C5e07_C2c   | O=CC(OO)C(O)C(O)C(=O)(OO(C(=O)CO))                                  | 254.2 |
| C5e07_C3a   | O=CC(OO)C(O)C(O)C(=O)(OO(C(=O)C(C=O)O))                             | 282.2 |
| C5e07_C3DI  | O=CC(OO)C(O)C(O)C(=O)(OOC(C=O)C=O)                                  | 266.2 |
| C5e07_C4a   | O=CC(OO)C(O)C(O)C(=O)(OOC(=O)C=CC(=O)C=O)                           | 306.2 |
| C5e07_C5a   | O=CC(OO)C(O)C(O)C(=O)(OO(C(=O)C=CC(=O)C(C=O)O))                     | 336.2 |
| C5e07_C5DI  | O=CC(OO)C(O)C(O)C(=O)(OO(C(C=O)C=CC=O))                             | 292.2 |
| C5e07_C5e07 | O=CC(OO)C(O)C(O)C(=O)(OO(C(=O)C(O)C(O)C(OO)C=O))                    | 358.2 |
| C5e07_C5e09 | O=CC(OO)C(O)C(O)C(=O)(OO(C(C(OO)C(O)C(O)C(OO)=O)=O))                | 390.2 |
| C5e07_C5O8  | O=CC(OO)C(O)C(O)C(=O)(OO(C(C(O)C(O)C(O)C(=O)OO)=O))                 | 374.2 |
| C5e07_C6a   | O=CC(OO)C(O)C(O)C(=O)(OOc1cccc1)                                    | 272.2 |
| C5e07_CATE  | O=CC(OO)C(O)C(O)C(=O)(OOc1cccc1O)                                   | 288.2 |
| C5e07_DNP   | O=CC(OO)C(O)C(O)C(=O)(OOC1(O)C(=CC2(OOC1C2O)N(=O)=O)N(=O)=O)        | 428.2 |
| C5e07_EPX   | O=CC(OO)C(O)C(O)C(=O)(OOC(=O)C1OC1C=O)                              | 294.2 |
| C5e07_MALa  | O=CC(OO)C(O)C(O)C(=O)(OOC(=O)C=CC=O)                                | 278.2 |
| C5e07_MALb  | O=CC(OO)C(O)C(O)C(=O)(OOC(C=O)C(O)C=O)                              | 296.2 |
| C5e07_MALc  | O=CC(OO)C(O)C(O)C(=O)(OOC1C(=O)OC(=O)C1O)                           | 310.2 |
| C5e07_NBZa  | O=CC(OO)C(O)C(O)C(=O)(OOC1C(=O)OCC1ON(=O)=O)                        | 341.2 |
| C5e07_NBZb  | O=CC(OO)C(O)C(O)C(=O)(OOC1C(=O)C=CC(=O)C1ON(=O)=O)                  | 365.2 |
| C5e07_NCAT  | O=CC(OO)C(O)C(O)C(=O)(OOC1(O)C(=CC2(OOC1C2O)N(=O)=O)O)              | 399.2 |
| C5e07_NDN   | O=CC(OO)C(O)C(O)C(=O)(OOC1(O)C(=CC2(OOC1C2ON(=O)=O)N(=O)=O)N(=O)=O) | 473.2 |
| C5e07_NNC   | O=CC(OO)C(O)C(O)C(=O)(OOC1(O)C(=CC2(OOC1C2ON(=O)=O)N(=O)=O)O)       | 444.2 |
| C5e07_NPHa  | O=CC(OO)C(O)C(O)C(=O)(OOC1(O)C=CC2OOC1C2ON(=O)=O)                   | 383.2 |
| C5e07_NPHb  | O=CC(OO)C(O)C(O)C(=O)(OOc1cccc1N(=O)=O)                             | 317.2 |
| C5e07_PBZ   | O=CC(OO)C(O)C(O)C(=O)(OOC1C(=O)C=CC(=O)C1O)                         | 320.2 |
| C5e07_PHEN  | O=CC(OO)C(O)C(O)C(=O)(OOC1(O)C=CC2OOC1C2O)                          | 338.2 |
| C5e09_BZBI  | O=C(OOC1C=CC2OOC1C2O)C(OO)C(O)C(O)C(OO)=O                           | 354.2 |
| C5e09_BZFU  | O=C(OOC1C(O)COC1=O)C(OO)C(O)C(O)C(OO)=O                             | 328.2 |
| C5e09_BZMUa | O=C(OOC(=O)C1OC1C=CC=O)C(OO)C(O)C(O)C(OO)=O                         | 352.2 |
| C5e09_BZMUb | O=C(OO(C(C1OC1C=O)C(O)C=O))C(OO)C(O)C(O)C(OO)=O                     | 370.2 |
| C5e09_C2a   | O=C(OOC(=O)C=O)C(OO)C(O)C(O)C(OO)=O                                 | 284.1 |
| C5e09_C2b   | O=C(OOCC=O)C(OO)C(O)C(O)C(OO)=O                                     | 270.2 |
| C5e09_C2c   | O=C(OO(C(=O)CO))C(OO)C(O)C(O)C(OO)=O                                | 286.2 |
| C5e09_C3a   | O=C(OO(C(=O)C(C=O)O))C(OO)C(O)C(O)C(OO)=O                           | 314.2 |
| C5e09_C3DI  | O=C(OOC(C=O)C=O)C(OO)C(O)C(O)C(OO)=O                                | 298.2 |
| C5e09_C4a   | O=C(OOC(=O)C=CC(=O)C=O)C(OO)C(O)C(O)C(OO)=O                         | 338.2 |
| C5e09_C5a   | O=C(OO(C(=O)C=CC(=O)C(C=O)O))C(OO)C(O)C(O)C(OO)=O                   | 368.2 |
| C5e09_C5DI  | O=C(OO(C(C=O)C=CC=O))C(OO)C(O)C(O)C(OO)=O                           | 324.2 |
| C5e09_C5e09 | O=C(OO(C(C(OO)C(O)C(O)C(OO)=O)=O))C(OO)C(O)C(O)C(OO)=O              | 422.2 |
| C5e09_C6a   | O=C(OOc1cccc1)C(OO)C(O)C(O)C(OO)=O                                  | 304.2 |
| C5e09_CATE  | O=C(OOc1cccc1O)C(OO)C(O)C(O)C(OO)=O                                 | 320.2 |
| C5e09_DNP   | O=C(OOC1(O)C(=CC2(OOC1C2O)N(=O)=O)N(=O)=O)C(OO)C(O)C(O)C(OO)=O      | 460.2 |

|             |                                                                       |       |
|-------------|-----------------------------------------------------------------------|-------|
| C5e09_EPX   | O=C(OOC(=O)C1OC1C=O)C(OO)C(O)C(O)C(OO)=O                              | 326.2 |
| C5e09_MALa  | O=C(OOC(=O)C=CC=O)C(OO)C(O)C(O)C(OO)=O                                | 310.2 |
| C5e09_MALb  | O=C(OOC(C=O)C(O)C=O)C(OO)C(O)C(O)C(OO)=O                              | 328.2 |
| C5e09_MALc  | O=C(OOC1C(=O)OC(=O)C1O)C(OO)C(O)C(O)C(OO)=O                           | 342.2 |
| C5e09_NBZa  | O=C(OOC1C(=O)OCC1ON(=O)=O)C(OO)C(O)C(O)C(OO)=O                        | 373.2 |
| C5e09_NBZb  | O=C(OOC1C(=O)C=CC(=O)C1ON(=O)=O)C(OO)C(O)C(O)C(OO)=O                  | 397.2 |
| C5e09_NCAT  | O=C(OOC1(O)C(=CC2(OOC1C2O)N(=O)=O)O)C(OO)C(O)C(O)C(OO)=O              | 431.2 |
| C5e09_NDN   | O=C(OOC1(O)C(=CC2(OOC1C2ON(=O)=O)N(=O)=O)N(=O)=O)C(OO)C(O)C(O)C(OO)=O | 505.2 |
| C5e09_NNC   | O=C(OOC1(O)C(=CC2(OOC1C2ON(=O)=O)N(=O)=O)O)C(OO)C(O)C(O)C(OO)=O       | 476.2 |
| C5e09_NPHa  | O=C(OOC1(O)C=CC2OOC1C2ON(=O)=O)C(OO)C(O)C(O)C(OO)=O                   | 415.2 |
| C5e09_NPHb  | O=C(OOC1c1cccc1N(=O)=O)C(OO)C(O)C(O)C(OO)=O                           | 349.2 |
| C5e09_PBZ   | O=C(OOC1C(=O)C=CC(=O)C1O)C(OO)C(O)C(O)C(OO)=O                         | 352.2 |
| C5e09_PHEN  | O=C(OOC1(O)C=CC2OOC1C2O)C(OO)C(O)C(O)C(OO)=O                          | 370.2 |
| C5euni_05_O | O=CC(OO)C(=O)C(O)C=O                                                  | 162.1 |
| C5euni_07_O | O=CC(OO)C(=O)C(O)C(OO)=O                                              | 194.1 |
| C5euni_09_O | O=C(OO)C(OO)C(=O)C(O)C(OO)=O                                          | 226.1 |
| C506_BZBI   | OOC=CC(O)C(O)C(=O)(OOC1C=CC2OOC1C2O)                                  | 306.2 |
| C506_BZFU   | OOC=CC(O)C(O)C(=O)(OOC1C(O)COC1=O)                                    | 280.2 |
| C506_BZMUa  | OOC=CC(O)C(O)C(=O)(OOC(=O)C1OC1C=CC=O)                                | 304.2 |
| C506_BZMUb  | OOC=CC(O)C(O)C(=O)(OO(C1OC1C=O)C(O)C=O))                              | 322.2 |
| C506_C2a    | OOC=CC(O)C(O)C(=O)(OOC(=O)C=O)                                        | 236.1 |
| C506_C2b    | OOC=CC(O)C(O)C(=O)(OOC=O)                                             | 222.2 |
| C506_C2c    | OOC=CC(O)C(O)C(=O)(OO(C(=O)CO))                                       | 238.2 |
| C506_C3a    | OOC=CC(O)C(O)C(=O)(OO(C(=O)C(C=O)O))                                  | 266.2 |
| C506_C3DI   | OOC=CC(O)C(O)C(=O)(OOC(C=O)C=O)                                       | 250.2 |
| C506_C4a    | OOC=CC(O)C(O)C(=O)(OOC(=O)C=CC(=O)C=O)                                | 290.2 |
| C506_C5a    | OOC=CC(O)C(O)C(=O)(OO(C(=O)C=CC(=O)C(C=O)O))                          | 320.2 |
| C506_C5DI   | OOC=CC(O)C(O)C(=O)(OO(C(C=O)C=CC=O))                                  | 276.2 |
| C506_C5e07  | OOC=CC(O)C(O)C(=O)(OO(C(=O)C(O)C(O)C(OO)C=O))                         | 342.2 |
| C506_C5e09  | OOC=CC(O)C(O)C(=O)(OO(C(C(OO)C(O)C(O)C(OO)=O)=O))                     | 374.2 |
| C506_C506   | OOC=CC(O)C(O)C(=O)(OO(C(=O)C(O)C(O)C=CO))                             | 326.2 |
| C506_C508   | OOC=CC(O)C(O)C(=O)(OO(C(C(O)C(O)C(O)C(=O)OO)=O))                      | 358.2 |
| C506_C6a    | OOC=CC(O)C(O)C(=O)(OOC1c1cccc1)                                       | 256.2 |
| C506_CATE   | OOC=CC(O)C(O)C(=O)(OOC1c1cccc1O)                                      | 272.2 |
| C506_DNP    | OOC=CC(O)C(O)C(=O)(OOC1(O)C(=CC2(OOC1C2O)N(=O)=O)N(=O)=O)             | 412.2 |
| C506_EPX    | OOC=CC(O)C(O)C(=O)(OOC(=O)C1OC1C=O)                                   | 278.2 |
| C506_MALa   | OOC=CC(O)C(O)C(=O)(OOC(=O)C=CC=O)                                     | 262.2 |
| C506_MALb   | OOC=CC(O)C(O)C(=O)(OOC(C=O)C(O)C=O)                                   | 280.2 |
| C506_MALc   | OOC=CC(O)C(O)C(=O)(OOC1C(=O)OC(=O)C1O)                                | 294.2 |
| C506_NBZa   | OOC=CC(O)C(O)C(=O)(OOC1C(=O)OCC1ON(=O)=O)                             | 325.2 |
| C506_NBZb   | OOC=CC(O)C(O)C(=O)(OOC1C(=O)C=CC(=O)C1ON(=O)=O)                       | 349.2 |
| C506_NCAT   | OOC=CC(O)C(O)C(=O)(OOC1(O)C(=CC2(OOC1C2O)N(=O)=O)O)                   | 383.2 |
| C506_NDN    | OOC=CC(O)C(O)C(=O)(OOC1(O)C(=CC2(OOC1C2ON(=O)=O)N(=O)=O)N(=O)=O)      | 457.2 |
| C506_NNC    | OOC=CC(O)C(O)C(=O)(OOC1(O)C(=CC2(OOC1C2ON(=O)=O)N(=O)=O)O)            | 428.2 |
| C506_NPHa   | OOC=CC(O)C(O)C(=O)(OOC1(O)C=CC2OOC1C2ON(=O)=O)                        | 367.2 |
| C506_NPHb   | OOC=CC(O)C(O)C(=O)(OOC1c1cccc1N(=O)=O)                                | 301.2 |

|            |                                                                                   |       |
|------------|-----------------------------------------------------------------------------------|-------|
| C5O6_PBZ   | <chem>OOC=CC(O)C(O)C(=O)(OOC1C(=O)C=CC(=O)C1O)</chem>                             | 304.2 |
| C5O6_PHEN  | <chem>OOC=CC(O)C(O)C(=O)(OOC1(O)C=CC2OOC1C2O)</chem>                              | 322.2 |
| C5O8_BZBI  | <chem>O=C(OOC1C=CC2OOC1C2O)C(O)C(O)C(O)C(=O)OO</chem>                             | 338.2 |
| C5O8_BZFU  | <chem>O=C(OOC1C(O)COC1=O)C(O)C(O)C(O)C(=O)OO</chem>                               | 312.2 |
| C5O8_BZMUa | <chem>O=C(OOC(=O)C1OC1C=CC=O)C(O)C(O)C(O)C(=O)OO</chem>                           | 336.2 |
| C5O8_BZMUb | <chem>O=C(OOC(C1OC1C=O)C(O)C(=O))C(O)C(O)C(O)C(=O)OO</chem>                       | 354.2 |
| C5O8_C2a   | <chem>O=C(OOC(=O)C=O)C(O)C(O)C(O)C(=O)OO</chem>                                   | 268.1 |
| C5O8_C2b   | <chem>O=C(OOCC=O)C(O)C(O)C(O)C(=O)OO</chem>                                       | 254.2 |
| C5O8_C2c   | <chem>O=C(OOC(C(=O)CO))C(O)C(O)C(O)C(=O)OO</chem>                                 | 270.2 |
| C5O8_C3a   | <chem>O=C(OOC(C(=O)C(C=O)O))C(O)C(O)C(O)C(=O)OO</chem>                            | 298.2 |
| C5O8_C3DI  | <chem>O=C(OOC(C=O)C=O)C(O)C(O)C(O)C(=O)OO</chem>                                  | 282.2 |
| C5O8_C4a   | <chem>O=C(OOC(=O)C=CC(=O)C=O)C(O)C(O)C(O)C(=O)OO</chem>                           | 322.2 |
| C5O8_C5a   | <chem>O=C(OOC(C(=O)C=CC(=O)C(C=O)O))C(O)C(O)C(O)C(=O)OO</chem>                    | 352.2 |
| C5O8_C5DI  | <chem>O=C(OOC(C(C=O)C=CC=O))C(O)C(O)C(O)C(=O)OO</chem>                            | 308.2 |
| C5O8_C5eO9 | <chem>O=C(OOC(C(C(OOC)C(O)C(O)C(OO)=O)=O)C(O)C(O)C(O)C(=O)OO</chem>               | 406.2 |
| C5O8_C5O8  | <chem>O=C(OOC(C(C(O)C(O)C(O)C(=O)OO)=O)C(O)C(O)C(O)C(=O)OO</chem>                 | 390.2 |
| C5O8_C6a   | <chem>O=C(OOC1C(O)C(=O)C(O)C(O)C(=O)OO</chem>                                     | 288.2 |
| C5O8_CATE  | <chem>O=C(OOC1C(O)C(=O)C(O)C(O)C(=O)OO</chem>                                     | 304.2 |
| C5O8_DNP   | <chem>O=C(OOC1(O)C(=CC2(OOC1C2O)N(=O)=O)N(=O)=O)C(O)C(O)C(O)C(=O)OO</chem>        | 444.2 |
| C5O8_EPX   | <chem>O=C(OOC(=O)C1OC1C=O)C(O)C(O)C(O)C(=O)OO</chem>                              | 310.2 |
| C5O8_MALa  | <chem>O=C(OOC(=O)C=CC=O)C(O)C(O)C(O)C(=O)OO</chem>                                | 294.2 |
| C5O8_MALb  | <chem>O=C(OOC(C=O)C(O)C=O)C(O)C(O)C(O)C(=O)OO</chem>                              | 312.2 |
| C5O8_MALc  | <chem>O=C(OOC1C(=O)OC(=O)C1O)C(O)C(O)C(O)C(=O)OO</chem>                           | 326.2 |
| C5O8_NBZa  | <chem>O=C(OOC1C(=O)OCC1ON(=O)=O)C(O)C(O)C(O)C(=O)OO</chem>                        | 357.2 |
| C5O8_NBZb  | <chem>O=C(OOC1C(=O)C=CC(=O)C1ON(=O)=O)C(O)C(O)C(O)C(=O)OO</chem>                  | 381.2 |
| C5O8_NCAT  | <chem>O=C(OOC1(O)C(=CC2(OOC1C2O)N(=O)=O)O)C(O)C(O)C(O)C(=O)OO</chem>              | 415.2 |
| C5O8_NDN   | <chem>O=C(OOC1(O)C(=CC2(OOC1C2ON(=O)=O)N(=O)=O)N(=O)=O)C(O)C(O)C(O)C(=O)OO</chem> | 489.2 |
| C5O8_NNC   | <chem>O=C(OOC1(O)C(=CC2(OOC1C2ON(=O)=O)N(=O)=O)O)C(O)C(O)C(O)C(=O)OO</chem>       | 460.2 |
| C5O8_NPHa  | <chem>O=C(OOC1(O)C=CC2OOC1C2ON(=O)=O)C(O)C(O)C(O)C(=O)OO</chem>                   | 399.2 |
| C5O8_NPHb  | <chem>O=C(OOC1C(O)C(=O)C(O)C(O)C(=O)OO</chem>                                     | 333.2 |
| C5O8_PBZ   | <chem>O=C(OOC1C(=O)C=CC(=O)C1O)C(O)C(O)C(O)C(=O)OO</chem>                         | 336.2 |
| C5O8_PHEN  | <chem>O=C(OOC1(O)C=CC2OOC1C2O)C(O)C(O)C(O)C(=O)OO</chem>                          | 354.2 |
| C5uni_O6_O | <chem>OOC=CC(=O)C(O)C(=O)OO</chem>                                                | 178.1 |
| C5uni_O8_O | <chem>O=C(OOC)C(=O)C(O)C(O)C(=O)OO</chem>                                         | 210.1 |
| C6a_BZFU   | <chem>O(c1ccccc1)OC1C(O)COC1=O</chem>                                             | 210.2 |
| C6a_C2a    | <chem>O(c1ccccc1)OC(=O)C=O</chem>                                                 | 166.1 |
| C6a_C2b    | <chem>O(c1ccccc1)OCC=O</chem>                                                     | 152.2 |
| C6a_C2c    | <chem>OCC(=O)(OOc1ccccc1)</chem>                                                  | 168.2 |
| C6a_C3a    | <chem>OC(C=O)C(=O)(OOc1ccccc1)</chem>                                             | 196.2 |
| C6a_C4a    | <chem>O(c1ccccc1)OC(=O)C=CC(=O)C=O</chem>                                         | 220.2 |
| C6a_C5a    | <chem>OC(C=O)C(=O)C=CC(=O)(OOc1ccccc1)</chem>                                     | 250.2 |
| C6a_C6a    | <chem>O(c1ccccc1)Oc1ccccc1</chem>                                                 | 186.2 |
| C6a_CATE   | <chem>O(c1ccccc1)Oc1ccccc1O</chem>                                                | 202.2 |
| C6a_DNP    | <chem>O(c1ccccc1)OC1(O)C(=CC2(OOC1C2O)N(=O)=O)N(=O)=O</chem>                      | 342.2 |
| C6a_MALc   | <chem>O(c1ccccc1)OC1C(=O)OC(=O)C1O</chem>                                         | 224.2 |
| C6a_NBZa   | <chem>O(c1ccccc1)OC1C(=O)OCC1ON(=O)=O</chem>                                      | 255.2 |

|              |                                                        |       |
|--------------|--------------------------------------------------------|-------|
| C6a_NBZb     | O(c1ccccc1)OC1C(=O)C=CC(=O)C1ON(=O)=O                  | 279.2 |
| C6a_NCAT     | O(c1ccccc1)OC1(O)C(=CC2(OOC1C2O)N(=O)=O)O              | 313.2 |
| C6a_NDN      | O(c1ccccc1)OC1(O)C(=CC2(OOC1C2ON(=O)=O)N(=O)=O)N(=O)=O | 387.2 |
| C6a_NNC      | O(c1ccccc1)OC1(O)C(=CC2(OOC1C2ON(=O)=O)N(=O)=O)O       | 358.2 |
| C6a_NPHb     | O(c1ccccc1)Oe1ccccc1N(=O)=O                            | 231.2 |
| C6a_PBZ      | O(c1ccccc1)OC1C(=O)C=CC(=O)C1O                         | 234.2 |
| C6CO4DB      | O=CC(=O)C=CC(=O)C=O                                    | 140.1 |
| C6DIALPERO4N | O=CC1OOC(C(C=O)ON(=O)=O)C1O                            | 221.1 |
| C6H5O        | [O]c1ccccc1                                            | 93.1  |
| C6H5O2       | [O]Oe1ccccc1                                           | 109.1 |
| C6H5OOH      | OOe1ccccc1                                             | 110.1 |
| C6H6O3       | C1=CC(=O)C(C=C1)(O)O                                   | 126.1 |
| C6H6O3_1     | C1(O)(O)C(=O)C=CC(O[O])C1(O)                           | 175.1 |
| C6H6O3_10    | C1(O)C(OO)C=CC(=O)C1(O)(O)                             | 176.1 |
| C6H6O3_11    | C1(O)(O)C(ON(=O)(=O))C(OO)C=CC1(=O)                    | 221.1 |
| C6H6O3_12    | C(=O)(O)C(=O)C=CC(=O)                                  | 128.1 |
| C6H6O3_13    | C1(O)(O)C(ON(=O)(=O))C(ON(=O)(=O))C=CC1(=O)            | 250.1 |
| C6H6O3_14    | C1(O)C(ON(=O)(=O))C=CC(=O)C1(O)(O)                     | 205.1 |
| C6H6O3_15    | C(=O)(OON(=O)(=O))C(O)(O)C=CC(=O)                      | 207.1 |
| C6H6O3_16    | C(=O)(O)C(O)(O)C=CC(=O)                                | 146.1 |
| C6H6O3_18    | C(=O)(OON(=O)(=O))C(O)(O)C(=O)                         | 181.1 |
| C6H6O3_19    | C(=O)C(O)(O)C(=O)CC(=O)                                | 146.1 |
| C6H6O3_2     | C(=O)C(O)(O)C(=O)C([O])C(=O)                           | 161.1 |
| C6H6O3_21    | C(=O)CC(O)(O)C(=O)C(=O)                                | 146.1 |
| C6H6O3_22    | C(=O)C(O)(O)C(=O)C(=O)                                 | 132.1 |
| C6H6O3_23    | C(=O)C(O)(O)C=CC(=O)                                   | 130.1 |
| C6H6O3_24    | C(=O)C(O)(O)C(=O)C=C                                   | 130.1 |
| C6H6O3_25    | C(=O)(OO)C(O)(O)C=CC(=O)                               | 162.1 |
| C6H6O3_26    | C(=O)C(=O)C(O)(O)C=C                                   | 130.1 |
| C6H6O3_27    | C(=O)(OO)C(O)(O)C(=O)                                  | 136.1 |
| C6H6O3_28    | C(=O)C(O)(O)C(=O)C1OC1C(=O)                            | 174.1 |
| C6H6O3_29    | C(=O)C(O)(O)C(=O)C(=O)CC(=O)                           | 174.1 |
| C6H6O3_3     | C(=O)C(=O)C(O)(O)C([O])C(=O)                           | 161.1 |
| C6H6O3_30    | C(O)(OO)C(=O)C(O)(O)C=CC(=O)                           | 192.1 |
| C6H6O3_31    | C(=O)C(=O)C(O)(O)C1OC1C(=O)                            | 174.1 |
| C6H6O3_32    | C(=O)CC(=O)C(O)(O)C(=O)C(=O)                           | 174.1 |
| C6H6O3_33    | C(O)(OO)C(O)(O)C(=O)C=CC(=O)                           | 192.1 |
| C6H6O3_34    | C(O)(OO)C=CC(=O)C(O)(O)C(=O)                           | 192.1 |
| C6H6O3_35    | C1(O)(O)C(=O)C=CC(=O)C1(O)                             | 158.1 |
| C6H6O3_36    | C1(O)(O)C(ON(=O)(=O))C(=O)C=CC1(=O)                    | 203.1 |
| C6H6O3_37    | C(=O)C(=O)C(O)(O)C=CC(=O)                              | 158.1 |
| C6H6O3_38    | C(O)(OO)C=CC(O)(O)C(=O)C(=O)                           | 192.1 |
| C6H6O3_39    | C(=O)(O)C(O)(O)C(=O)                                   | 120.1 |
| C6H6O3_4     | C(=O)C=CC(O)(O)C(=O)(O[O])                             | 161.1 |
| C6H6O3_40    | C1(O)C(O)(O)C(=O)C=CC1(O)                              | 160.1 |
| C6H6O3_41    | C1(O)(O)C(ON(=O)(=O))C(O)C=CC1(=O)                     | 205.1 |

|              |                                                        |       |
|--------------|--------------------------------------------------------|-------|
| C6H6O3_42    | C(=O)(O)C(=O)C(O)(O)C=CC(=O)                           | 174.1 |
| C6H6O3_43    | C(=O)(O)C(O)(O)C(=O)C=CC(=O)                           | 174.1 |
| C6H6O3_44    | C(=O)(O)C=CC(=O)C(O)(O)C(=O)                           | 174.1 |
| C6H6O3_45    | C(=O)(O)C=CC(O)(O)C(=O)C(=O)                           | 174.1 |
| C6H6O3_5     | C1(O)(O)C(ON(=O)(=O))C(O[O])C=CC1(=O)                  | 220.1 |
| C6H6O3_6     | C1(O)(O)C(=O)C=CC([O])C1(O)                            | 159.1 |
| C6H6O3_7     | C(=O)C(O)(O)C(=O)(O[O])                                | 135.1 |
| C6H6O3_8     | C1(O)(O)C(ON(=O)(=O))C([O])C=CC1(=O)                   | 204.1 |
| C6H6O3_9     | C(=O)C(O)(O)C(=O)C=CC(=O)                              | 158.1 |
| C6H6O4       | C(=CC=O)C=C(C(=O)O)O                                   | 142.1 |
| C6H6O7       | C(=CC(C(=O)O)OO)C(=O)C(=O)O                            | 190.1 |
| C6H7O10N     | O=CC(=O)C(OO)C(OO)C(C=O)ON(=O)=O                       | 253.1 |
| C6H7O11      | C(=O)(C(C(C(C(=O)O)OO)OO)O[O])C(=O)O                   | 255.1 |
| C6H7O12N     | C(=O)(C(C(C(C(=O)O)OO)OO)ON(=O)=O)C(=O)O               | 285.1 |
| C6H7O6       | C(=CC(C(C(=O)O)O)O[O])C=O                              | 175.1 |
| C6H7O7       | O=CC([O])=CC(OO)C(C=O)OO                               | 191.1 |
| C6H7O8       | C(=CC(=O)O[O])C(C(C(=O)O)O)OO                          | 207.1 |
| C6H7O9       | O=CC(=O)C(OO)C(OO)C(C=O)O[O]                           | 223.1 |
| C6H7O9gd     | C(=C(C(=O)O)O)C(C(C(=O)O)OO)O[O]                       | 223.1 |
| C6H7O9N      | C(=CC(=O)OO)C(C(C(=O)O)O)ON(=O)=O                      | 237.1 |
| C6H8O11      | C(=O)(C(C(C(C(=O)O)OO)OO)OO)C(=O)O                     | 256.1 |
| C6H8O8       | C(=CC(=O)OO)C(C(C(=O)O)O)OO                            | 208.1 |
| C6H8O9       | O=CC(=O)C(OO)C(OO)C(C=O)OO                             | 224.1 |
| cat_PC2      | C(=CC(C(=O)O)O[O])C(C(=O)O)O                           | 191.1 |
| CATE_C2a     | O(c1cccc1O)OC(=O)C=O                                   | 182.1 |
| CATE_C2b     | O(c1cccc1O)OCC=O                                       | 168.2 |
| CATE_C2c     | OCC(=O)(OOc1cccc1O)                                    | 184.2 |
| CATE_C4a     | O(c1cccc1O)OC(=O)C=CC(=O)C=O                           | 236.2 |
| CATE_C5a     | OC(C=O)C(=O)C=CC(=O)(OOc1cccc1O)                       | 266.2 |
| CATE_CATE    | O(c1cccc1O)Oc1cccc1O                                   | 218.2 |
| CATE_DNP     | O(c1cccc1O)OC1(O)C(=CC2(OOC1C2O)N(=O)=O)N(=O)=O        | 358.2 |
| CATE_MALc    | O(c1cccc1O)OC1C(=O)OC(=O)C1O                           | 240.2 |
| CATE_NBZb    | O(c1cccc1O)OC1C(=O)C=CC(=O)C1ON(=O)=O                  | 295.2 |
| CATE_NCAT    | O(c1cccc1O)OC1(O)C(=CC2(OOC1C2O)N(=O)=O)O              | 329.2 |
| CATE_NDN     | O(c1cccc1O)OC1(O)C(=CC2(OOC1C2ON(=O)=O)N(=O)=O)N(=O)=O | 403.2 |
| CATE_NNC     | O(c1cccc1O)OC1(O)C(=CC2(OOC1C2ON(=O)=O)N(=O)=O)O       | 374.2 |
| CATE_NPHb    | O(c1cccc1O)Oc1cccc1N(=O)=O                             | 247.2 |
| CATE_PBZ     | O(c1cccc1O)OC1C(=O)C=CC(=O)C1O                         | 250.2 |
| CATEC1O      | [O]c1cccc1O                                            | 109.1 |
| CATEC1O2     | [O]Oc1cccc1O                                           | 125.1 |
| CATEC1OOH    | OOc1cccc1O                                             | 126.1 |
| CATECBIPERO  | [O]C1(O)C(O)=CC2OOC1C2O                                | 175.1 |
| CATECBIPERO2 | [O]OC1(O)C(O)=CC2OOC1C2O                               | 191.1 |
| CATECBP2OH   | OC2=CC1OOC(C1O)C2(O)O                                  | 176.1 |
| CATECBPOOH   | OOC1(O)C(O)=CC2OOC1C2O                                 | 192.1 |
| CATECHOL     | Oc1cccc1O                                              | 110.1 |

|            |                                                                            |       |
|------------|----------------------------------------------------------------------------|-------|
| CATECOOA   | [O-][O+]=C(O)C=CC=CC(=O)O                                                  | 158.1 |
| CH2OO      | [O-][O+]=C                                                                 | 46.0  |
| CH2OOA     | [O-][O+]=C                                                                 | 46.0  |
| CH2OOB     | [O-][O+]=C                                                                 | 46.0  |
| CHOCOHO    | [O]C(CO)C=O                                                                | 89.1  |
| CO14O3CHO  | O=CCOC(=O)C=O                                                              | 116.1 |
| CO14O3CO2H | O=CCOC(=O)C(=O)O                                                           | 132.1 |
| CO2C4DIAL  | O=CC(=O)C(=O)C=O                                                           | 114.1 |
| DNP_C2c    | OCC(=O)(OOC1(O)C(=CC2(OOC1C2O)N(=O)=O)N(=O)=O)                             | 324.2 |
| DNP_C4a    | O(C1(O)C(=CC2(OOC1C2O)N(=O)=O)N(=O)=O)OC(=O)C=CC(=O)C=O                    | 376.2 |
| DNP_C5a    | OC(C=O)C(=O)C=CC(=O)(OOC1(O)C(=CC2(OOC1C2O)N(=O)=O)N(=O)=O)                | 406.2 |
| DNP_DNP    | O(C1(O)C(=CC2(OOC1C2O)N(=O)=O)N(=O)=O)OC1(O)C(=CC2(OOC1C2O)N(=O)=O)N(=O)=O | 498.2 |
| DNPHEN     | O=N(=O)c1ccc(O)c(c1)N(=O)=O                                                | 184.1 |
| DNPHENO    | O=N(=O)C1=CC2(OOC(C2O)C1([O])O)N(=O)=O                                     | 249.1 |
| DNPHENO2   | [O]OC1(O)C(=CC2(OOC1C2O)N(=O)=O)N(=O)=O                                    | 265.1 |
| DNPHENOOH  | OOC1(O)C(=CC2(OOC1C2O)N(=O)=O)N(=O)=O                                      | 266.1 |
| EPX_BZFU   | O(C(=O)C1OC1C=O)OC1C(O)COC1=O                                              | 232.1 |
| EPX_C2a    | O(C(=O)C1OC1C=O)OC(=O)C=O                                                  | 188.1 |
| EPX_C2b    | O(C(=O)C1OC1C=O)OCC=O                                                      | 174.1 |
| EPX_C2c    | OCC(=O)(OOC(=O)C1OC1C=O)                                                   | 190.1 |
| EPX_C3a    | OC(C=O)C(=O)(OOC(=O)C1OC1C=O)                                              | 218.1 |
| EPX_C3DI   | O(C(=O)C1OC1C=O)OC(C=O)C=O                                                 | 202.1 |
| EPX_C4a    | O(C(=O)C1OC1C=O)OC(=O)C=CC(=O)C=O                                          | 242.1 |
| EPX_C5a    | OC(C=O)C(=O)C=CC(=O)(OOC(=O)C1OC1C=O)                                      | 272.2 |
| EPX_C6a    | O(C(=O)C1OC1C=O)Oc1ccccc1                                                  | 208.2 |
| EPX_CATE   | O(C(=O)C1OC1C=O)Oc1ccccc1O                                                 | 224.2 |
| EPX_DNP    | O(C(=O)C1OC1C=O)OC1(O)C(=CC2(OOC1C2O)N(=O)=O)N(=O)=O                       | 364.2 |
| EPX_EPX    | O(C(=O)C1OC1C=O)OC(=O)C1OC1C=O                                             | 230.1 |
| EPX_MALb   | O(C(=O)C1OC1C=O)OC(C=O)C(O)C=O                                             | 232.1 |
| EPX_MALc   | O(C(=O)C1OC1C=O)OC1C(=O)OC(=O)C1O                                          | 246.1 |
| EPX_NBZa   | O(C(=O)C1OC1C=O)OC1C(=O)OCC1ON(=O)=O                                       | 277.1 |
| EPX_NBZb   | O(C(=O)C1OC1C=O)OC1C(=O)C=CC(=O)C1ON(=O)=O                                 | 301.2 |
| EPX_NCAT   | O(C(=O)C1OC1C=O)OC1(O)C(=CC2(OOC1C2O)N(=O)=O)O                             | 335.2 |
| EPX_NDN    | O(C(=O)C1OC1C=O)OC1(O)C(=CC2(OOC1C2ON(=O)=O)N(=O)=O)N(=O)=O                | 409.2 |
| EPX_NNC    | O(C(=O)C1OC1C=O)OC1(O)C(=CC2(OOC1C2ON(=O)=O)N(=O)=O)O                      | 380.2 |
| EPX_NPHb   | O(C(=O)C1OC1C=O)Oc1ccccc1N(=O)=O                                           | 253.2 |
| EPX_PBZ    | O(C(=O)C1OC1C=O)OC1C(=O)C=CC(=O)C1O                                        | 256.2 |
| EPXC4DIAL  | O=CC1OC1C=O                                                                | 100.1 |
| EPXDLCO2H  | O=CC1OC1C(=O)O                                                             | 116.1 |
| EPXDLCO3   | [O]OC(=O)C1OC1C=O                                                          | 131.1 |
| EPXDLCO3H  | OOC(=O)C1OC1C=O                                                            | 132.1 |
| EPXDLPAN   | O=CC1OC1C(=O)OON(=O)=O                                                     | 177.1 |
| ETHENO3O   | [O]CCON(=O)=O                                                              | 106.1 |
| ETHENO3O2  | [O]OCCON(=O)=O                                                             | 122.1 |
| ETHGLY     | OCCO                                                                       | 62.1  |
| ETHO2HNO3  | OCCON(=O)=O                                                                | 123.1 |

|            |                                                    |       |
|------------|----------------------------------------------------|-------|
| ETHOHNO3   | OC(=O)C(=O)O                                       | 107.1 |
| gdBPR_CAT  | C1=CC(C2(C(C1OO2)(O)O)O)O[O]                       | 191.1 |
| gdBPR_PHEN | C1=CC2C(C(C1O[O])OO2)(O)O                          | 175.1 |
| GLY        | O=CC=O                                             | 58.0  |
| GLYOO      | [O-][O+]=CC=O                                      | 74.0  |
| GLYOOA     | [O-][O+]=CC=O                                      | 74.0  |
| GLYOOB     | [O-][O+]=CC=O                                      | 74.0  |
| HCHO       | C=O                                                | 30.0  |
| HCOCH2O    | [O]CC=O                                            | 59.0  |
| HCOCH2O2   | [O]OCC=O                                           | 75.0  |
| HCOCH2OOH  | OCC=O                                              | 76.1  |
| HCOCO      | O=[C]C=O                                           | 57.0  |
| HCOCO2H    | O=CC(=O)O                                          | 74.0  |
| HCOCO3     | [O]OC(=O)C=O                                       | 89.0  |
| HCOCO3H    | OOC(=O)C=O                                         | 90.0  |
| HCOCOHC03  | OC(C=O)C(=O)O[O]                                   | 119.1 |
| HCOCOHC03H | OC(C=O)C(=O)OO                                     | 120.1 |
| HCOCOHPAN  | O=CC(O)C(=O)OON(=O)=O                              | 165.1 |
| HOC6H4NO2  | O=N(=O)c1ccccc1O                                   | 139.1 |
| HOCH2CH2O  | OCC[O]                                             | 61.1  |
| HOCH2CH2O2 | OCCO[O]                                            | 77.1  |
| HOCH2CHO   | OCC=O                                              | 60.1  |
| HOCH2CO2H  | OCC(=O)O                                           | 76.1  |
| HOCH2CO3   | OCC(=O)O[O]                                        | 91.0  |
| HOCH2CO3H  | OCC(=O)OO                                          | 92.1  |
| HOCH2COCHO | OCC(=O)C=O                                         | 88.1  |
| HOCHOCOOH  | OCC(OO)C=O                                         | 106.1 |
| HOCOC4DIAL | O=CC(=O)C(O)C=O                                    | 116.1 |
| HOHOC4DIAL | O=CC(O)C(O)C=O                                     | 118.1 |
| HYETHO2H   | OCCOO                                              | 78.1  |
| KETB       | O=C=CCC=O                                          | 84.1  |
| KETENAL    | C(=C=O)C=O                                         | 70.1  |
| KETENOL    | O=C=CC=CO                                          | 84.1  |
| M1C2O2     | O=C(O)C(O)O[O]                                     | 107.0 |
| M1O2A      | OC(=O)C(O)C(C=O)O[O]                               | 149.1 |
| MALa_BZFU  | O(C(=O)C=CC=O)OC1C(O)COC1=O                        | 216.1 |
| MALa_C2a   | O(C(=O)C=CC=O)OC(=O)C=O                            | 172.1 |
| MALa_C2b   | O(C(=O)C=CC=O)OCC=O                                | 158.1 |
| MALa_C2c   | OCC(=O)(OOC(=O)C=CC=O)                             | 174.1 |
| MALa_C3a   | OC(C=O)C(=O)(OOC(=O)C=CC=O)                        | 202.1 |
| MALa_C3DI  | O(C(=O)C=CC=O)OC(C=O)C=O                           | 186.1 |
| MALa_C4a   | O(C(=O)C=CC=O)OC(=O)C=CC(=O)C=O                    | 226.1 |
| MALa_C5a   | OC(C=O)C(=O)C=CC(=O)(OOC(=O)C=CC=O)                | 256.2 |
| MALa_C6a   | O(C(=O)C=CC=O)Oc1ccccc1                            | 192.2 |
| MALa_CATE  | O(C(=O)C=CC=O)Oc1ccccc1O                           | 208.2 |
| MALa_DNP   | O(C(=O)C=CC=O)OC1(O)C(=CC2(OOC1C2O)N(=O)=O)N(=O)=O | 348.2 |

|              |                                                                             |       |
|--------------|-----------------------------------------------------------------------------|-------|
| MALa_EPX     | <chem>O(C(=O)C=CC=O)OC(=O)C1OC1C=O</chem>                                   | 214.1 |
| MALa_MALa    | <chem>O(C(=O)C=CC=O)OC(=O)C=CC=O</chem>                                     | 198.1 |
| MALa_MALb    | <chem>O(C(=O)C=CC=O)OC(C=O)C(O)C=O</chem>                                   | 216.1 |
| MALa_MALc    | <chem>O(C(=O)C=CC=O)OC1C(=O)OC(=O)C1O</chem>                                | 230.1 |
| MALa_NBZa    | <chem>O(C(=O)C=CC=O)OC1C(=O)OCC1ON(=O)=O</chem>                             | 261.1 |
| MALa_NBZb    | <chem>O(C(=O)C=CC=O)OC1C(=O)C=CC(=O)C1ON(=O)=O</chem>                       | 285.2 |
| MALa_NCAT    | <chem>O(C(=O)C=CC=O)OC1(O)C(=CC2(OOC1C2O)N(=O)=O)O</chem>                   | 319.2 |
| MALa_NDN     | <chem>O(C(=O)C=CC=O)OC1(O)C(=CC2(OOC1C2ON(=O)=O)N(=O)=O)N(=O)=O</chem>      | 393.2 |
| MALa_NNC     | <chem>O(C(=O)C=CC=O)OC1(O)C(=CC2(OOC1C2ON(=O)=O)N(=O)=O)O</chem>            | 364.2 |
| MALa_NPHb    | <chem>O(C(=O)C=CC=O)Oc1ccccc1N(=O)=O</chem>                                 | 237.2 |
| MALa_PBZ     | <chem>O(C(=O)C=CC=O)OC1C(=O)C=CC(=O)C1O</chem>                              | 240.2 |
| MALANHY      | <chem>O=C1C=CC(=O)O1</chem>                                                 | 98.1  |
| MALANHY2OH   | <chem>O=C1OC(=O)C(O)C1O</chem>                                              | 132.1 |
| MALANHYO     | <chem>O=C1OC(=O)C(O)C1[O]</chem>                                            | 131.1 |
| MALANHYO2    | <chem>[O]OC1C(=O)OC(=O)C1O</chem>                                           | 147.1 |
| MALANHYONO2  | <chem>OONOC1C(=O)OC(=O)C1O</chem>                                           | 179.1 |
| MALANHYOOH   | <chem>OOC1C(=O)OC(=O)C1O</chem>                                             | 148.1 |
| MALb_BZFU    | <chem>O(C(C=O)C(O)C=O)OC1C(O)COC1=O</chem>                                  | 234.2 |
| MALb_C2a     | <chem>O(C(C=O)C(O)C=O)OC(=O)C=O</chem>                                      | 190.1 |
| MALb_C2b     | <chem>O(C(C=O)C(O)C=O)OCC=O</chem>                                          | 176.1 |
| MALb_C2c     | <chem>OCC(=O)(OOC(C=O)C(O)C=O)</chem>                                       | 192.1 |
| MALb_C3a     | <chem>OC(C=O)C(=O)(OOC(C=O)C(O)C=O)</chem>                                  | 220.1 |
| MALb_C4a     | <chem>O(C(C=O)C(O)C=O)OC(=O)C=CC(=O)C=O</chem>                              | 244.2 |
| MALb_C5a     | <chem>OC(C=O)C(=O)C=CC(=O)(OOC(C=O)C(O)C=O)</chem>                          | 274.2 |
| MALb_C6a     | <chem>O(C(C=O)C(O)C=O)Oc1ccccc1</chem>                                      | 210.2 |
| MALb_CATE    | <chem>O(C(C=O)C(O)C=O)Oc1ccccc1O</chem>                                     | 226.2 |
| MALb_DNP     | <chem>O(C(C=O)C(O)C=O)OC1(O)C(=CC2(OOC1C2O)N(=O)=O)N(=O)=O</chem>           | 366.2 |
| MALb_MALb    | <chem>O(C(C=O)C(O)C=O)OC(C=O)C(O)C=O</chem>                                 | 234.2 |
| MALb_MALc    | <chem>O(C(C=O)C(O)C=O)OC1C(=O)OC(=O)C1O</chem>                              | 248.1 |
| MALb_NBZa    | <chem>O(C(C=O)C(O)C=O)OC1C(=O)OCC1ON(=O)=O</chem>                           | 279.2 |
| MALb_NBZb    | <chem>O(C(C=O)C(O)C=O)OC1C(=O)C=CC(=O)C1ON(=O)=O</chem>                     | 303.2 |
| MALb_NCAT    | <chem>O(C(C=O)C(O)C=O)OC1(O)C(=CC2(OOC1C2O)N(=O)=O)O</chem>                 | 337.2 |
| MALb_NDN     | <chem>O(C(C=O)C(O)C=O)OC1(O)C(=CC2(OOC1C2ON(=O)=O)N(=O)=O)N(=O)=O</chem>    | 411.2 |
| MALb_NNC     | <chem>O(C(C=O)C(O)C=O)OC1(O)C(=CC2(OOC1C2ON(=O)=O)N(=O)=O)O</chem>          | 382.2 |
| MALb_NPHb    | <chem>O(C(C=O)C(O)C=O)Oc1ccccc1N(=O)=O</chem>                               | 255.2 |
| MALb_PBZ     | <chem>O(C(C=O)C(O)C=O)OC1C(=O)C=CC(=O)C1O</chem>                            | 258.2 |
| MALc_C2c     | <chem>OCC(=O)(OOC1C(=O)OC(=O)C1O)</chem>                                    | 206.1 |
| MALc_C4a     | <chem>O(C1C(=O)OC(=O)C1O)OC(=O)C=CC(=O)C=O</chem>                           | 258.1 |
| MALc_C5a     | <chem>OC(C=O)C(=O)C=CC(=O)(OOC1C(=O)OC(=O)C1O)</chem>                       | 288.2 |
| MALc_DNP     | <chem>O(C1C(=O)OC(=O)C1O)OC1(O)C(=CC2(OOC1C2O)N(=O)=O)N(=O)=O</chem>        | 380.2 |
| MALc_MALc    | <chem>O(C1C(=O)OC(=O)C1O)OC1C(=O)OC(=O)C1O</chem>                           | 262.1 |
| MALc_NDN     | <chem>O(C1C(=O)OC(=O)C1O)OC1(O)C(=CC2(OOC1C2ON(=O)=O)N(=O)=O)N(=O)=O</chem> | 425.2 |
| MALDALCO2H   | <chem>O=CC=CC(=O)O</chem>                                                   | 100.1 |
| MALDALCO2HOH | <chem>O=CC=C(O)C(=O)O</chem>                                                | 116.1 |
| MALDALCO3H   | <chem>OOC(=O)C=CC=O</chem>                                                  | 116.1 |
| MALDIAL      | <chem>O=CC=CC=O</chem>                                                      | 84.1  |

|             |                                                                         |       |
|-------------|-------------------------------------------------------------------------|-------|
| MALDIAL2OH  | O=CC(O)=C(O)C=O                                                         | 116.1 |
| MALDIALCO2  | O=CC=CC(=O)[O]                                                          | 99.1  |
| MALDIALCO3  | [O]OC(=O)C=CC=O                                                         | 115.1 |
| MALDIALO    | O=CC(O)C([O])C=O                                                        | 117.1 |
| MALDIALO2   | [O]OC(C=O)C(O)C=O                                                       | 133.1 |
| MALDIALOH   | O=CC=C(O)C=O                                                            | 100.1 |
| MALDIALONO2 | O=CC(O)C(C=O)ON(=O)=O                                                   | 163.1 |
| MALDIALOOH  | OOC(C=O)C(O)C=O                                                         | 134.1 |
| MALDIALPAN  | O=CC=CC(=O)OON(=O)=O                                                    | 161.1 |
| MALNHYOHCO  | O=C1OC(=O)C(O)C1=O                                                      | 130.1 |
| MDALCO2H2OH | O=C(O)C=C(O)C=O                                                         | 132.1 |
| NBENZ3OH    | O=N(=O)c1ccc(O)c(O)c1O                                                  | 171.1 |
| NBENZ3OH0   | O=N(=O)C12C=C(O)C(O)([O])C(O)(OO1)C2O                                   | 236.1 |
| NBENZ3OH02  | O=N(=O)C12C=C(O)C(O)(O[O])C(O)(OO1)C2O                                  | 252.1 |
| NBENZ3OHOOH | O=N(=O)C12C=C(O)C(O)(OO)C(O)(OO1)C2O                                    | 253.1 |
| NBENZ4OH    | O=N(=O)c1c(O)cc(O)c(O)c1O                                               | 187.1 |
| NBENZ4OH0   | O=N(=O)C12OOC(O)(C1O)C(O)([O])C(O)=C2O                                  | 252.1 |
| NBENZ4OH02  | O=N(=O)C12OOC(O)(C1O)C(O)(O[O])C(O)=C2O                                 | 268.1 |
| NBENZ4OHOOH | O=N(=O)C12OOC(O)(C1O)C(O)(OO)C(O)=C2O                                   | 269.1 |
| NBZa_BZFU   | O(C1C(=O)OCC1ON(=O)=O)OC1C(O)COC1=O                                     | 279.2 |
| NBZa_C2a    | O(C1C(=O)OCC1ON(=O)=O)OC(=O)C=O                                         | 235.1 |
| NBZa_C2b    | O(C1C(=O)OCC1ON(=O)=O)OCC=O                                             | 221.1 |
| NBZa_C2c    | OCC(=O)(OOC1C(=O)OCC1ON(=O)=O)                                          | 237.1 |
| NBZa_C3a    | OC(C=O)C(=O)(OOC1C(=O)OCC1ON(=O)=O)                                     | 265.1 |
| NBZa_C4a    | O(C1C(=O)OCC1ON(=O)=O)OC(=O)C=CC(=O)C=O                                 | 289.2 |
| NBZa_C5a    | OC(C=O)C(=O)C=CC(=O)(OOC1C(=O)OCC1ON(=O)=O)                             | 319.2 |
| NBZa_CATE   | O(C1C(=O)OCC1ON(=O)=O)Oc1ccccc1O                                        | 271.2 |
| NBZa_DNP    | O(C1C(=O)OCC1ON(=O)=O)OC1(O)C(=CC2(OOC1C2O)N(=O)=O)N(=O)=O              | 411.2 |
| NBZa_MALc   | O(C1C(=O)OCC1ON(=O)=O)OC1C(=O)OC(=O)C1O                                 | 293.1 |
| NBZa_NBZa   | O(C1C(=O)OCC1ON(=O)=O)OC1C(=O)OCC1ON(=O)=O                              | 324.2 |
| NBZa_NBZb   | O(C1C(=O)OCC1ON(=O)=O)OC1C(=O)C=CC(=O)C1ON(=O)=O                        | 348.2 |
| NBZa_NCAT   | O(C1C(=O)OCC1ON(=O)=O)OC1(O)C(=CC2(OOC1C2O)N(=O)=O)O                    | 382.2 |
| NBZa_NDN    | O(C1C(=O)OCC1ON(=O)=O)OC1(O)C(=CC2(OOC1C2ON(=O)=O)N(=O)=O)N(=O)=O       | 456.2 |
| NBZa_NNC    | O(C1C(=O)OCC1ON(=O)=O)OC1(O)C(=CC2(OOC1C2ON(=O)=O)N(=O)=O)O             | 427.2 |
| NBZa_NPHb   | O(C1C(=O)OCC1ON(=O)=O)Oc1ccccc1N(=O)=O                                  | 300.2 |
| NBZa_PBZ    | O(C1C(=O)OCC1ON(=O)=O)OC1C(=O)C=CC(=O)C1O                               | 303.2 |
| NBZb_C2c    | OCC(=O)(OOC1C(=O)C=CC(=O)C1ON(=O)=O)                                    | 261.1 |
| NBZb_C4a    | O(C1C(=O)C=CC(=O)C1ON(=O)=O)OC(=O)C=CC(=O)C=O                           | 313.2 |
| NBZb_C5a    | OC(C=O)C(=O)C=CC(=O)(OOC1C(=O)C=CC(=O)C1ON(=O)=O)                       | 343.2 |
| NBZb_DNP    | O(C1C(=O)C=CC(=O)C1ON(=O)=O)OC1(O)C(=CC2(OOC1C2O)N(=O)=O)N(=O)=O        | 435.2 |
| NBZb_MALc   | O(C1C(=O)C=CC(=O)C1ON(=O)=O)OC1C(=O)OC(=O)C1O                           | 317.2 |
| NBZb_NBZb   | O(C1C(=O)C=CC(=O)C1ON(=O)=O)OC1C(=O)C=CC(=O)C1ON(=O)=O                  | 372.2 |
| NBZb_NDN    | O(C1C(=O)C=CC(=O)C1ON(=O)=O)OC1(O)C(=CC2(OOC1C2ON(=O)=O)N(=O)=O)N(=O)=O | 480.2 |
| NBZb_PBZ    | O(C1C(=O)C=CC(=O)C1ON(=O)=O)OC1C(=O)C=CC(=O)C1O                         | 327.2 |
| NBZFUO      | O=N(=O)OC1COC(=O)C1[O]                                                  | 162.1 |
| NBZFUO2     | [O]OC1C(=O)OCC1ON(=O)=O                                                 | 178.1 |

|              |                                                                                          |       |
|--------------|------------------------------------------------------------------------------------------|-------|
| NBZFUONE     | O=N(=O)OC1C(=O)COC1=O                                                                    | 161.1 |
| NBZFUOOH     | OOC1C(=O)OCC1ON(=O)=O                                                                    | 179.1 |
| NBZQO        | O=N(=O)OC1C(=O)C=CC(=O)C1[O]                                                             | 186.1 |
| NBZQO2       | [O]OC1C(=O)C=CC(=O)C1ON(=O)=O                                                            | 202.1 |
| NBZQOOH      | OOC1C(=O)C=CC(=O)C1ON(=O)=O                                                              | 203.1 |
| NC4DCO2      | O=CC(=CC(=O)[O])N(=O)=O                                                                  | 144.1 |
| NC4DCO2H     | O=CC(=CC(=O)O)N(=O)=O                                                                    | 145.1 |
| NC4DCO2HOH   | O=CC(=C(O)C(=O)O)N(=O)=O                                                                 | 161.1 |
| NCAT_C2c     | OCC(=O)(OOC1(O)C(=CC2(OOC1C2O)N(=O)=O)O)                                                 | 295.2 |
| NCAT_C4a     | O(C1(O)C(=CC2(OOC1C2O)N(=O)=O)O)OC(=O)C=CC(=O)C=O                                        | 347.2 |
| NCAT_C5a     | OC(C=O)C(=O)C=CC(=O)(OOC1(O)C(=CC2(OOC1C2O)N(=O)=O)O)                                    | 377.2 |
| NCAT_DNP     | O(C1(O)C(=CC2(OOC1C2O)N(=O)=O)O)OC1(O)C(=CC2(OOC1C2O)N(=O)=O)N(=O)=O                     | 469.2 |
| NCAT_MALc    | O(C1(O)C(=CC2(OOC1C2O)N(=O)=O)O)OC1C(=O)OC(=O)C1O                                        | 351.2 |
| NCAT_NBZb    | O(C1(O)C(=CC2(OOC1C2O)N(=O)=O)O)OC1C(=O)C=CC(=O)C1ON(=O)=O                               | 406.2 |
| NCAT_NCAT    | O(C1(O)C(=CC2(OOC1C2O)N(=O)=O)O)OC1(O)C(=CC2(OOC1C2O)N(=O)=O)O                           | 440.2 |
| NCAT_NDN     | O(C1(O)C(=CC2(OOC1C2O)N(=O)=O)O)OC1(O)C(=CC2(OOC1C2ON(=O)=O)N(=O)=O)N(=O)=O              | 514.2 |
| NCAT_PBZ     | O(C1(O)C(=CC2(OOC1C2O)N(=O)=O)O)OC1C(=O)C=CC(=O)C1O                                      | 361.2 |
| NCATECHOL    | O=N(=O)c1ccc(O)c(O)c1                                                                    | 155.1 |
| NCATECO      | O=N(=O)C12OOC(C2O)C(O)([O])C(=C1)O                                                       | 220.1 |
| NCATECO2     | [O]OC1(O)C(=CC2(OOC1C2O)N(=O)=O)O                                                        | 236.1 |
| NCATECOOH    | OOC1(O)C(=CC2(OOC1C2O)N(=O)=O)O                                                          | 237.1 |
| NDN_C2c      | OCC(=O)(OOC1(O)C(=CC2(OOC1C2ON(=O)=O)N(=O)=O)N(=O)=O)                                    | 369.2 |
| NDN_C4a      | O(C1(O)C(=CC2(OOC1C2ON(=O)=O)N(=O)=O)N(=O)=O)OC(=O)C=CC(=O)C=O                           | 421.2 |
| NDN_C5a      | OC(C=O)C(=O)C=CC(=O)(OOC1(O)C(=CC2(OOC1C2ON(=O)=O)N(=O)=O)N(=O)=O)                       | 451.2 |
| NDN_DNP      | O(C1(O)C(=CC2(OOC1C2ON(=O)=O)N(=O)=O)N(=O)=O)OC1(O)C(=CC2(OOC1C2O)N(=O)=O)N(=O)=O        | 543.2 |
| NDN_NDN      | O(C1(O)C(=CC2(OOC1C2ON(=O)=O)N(=O)=O)N(=O)=O)OC1(O)C(=CC2(OOC1C2ON(=O)=O)N(=O)=O)N(=O)=O | 588.2 |
| NDNPHENO     | O=N(=O)OC1C2OOC1(C=C(N(=O)=O)C2([O])O)N(=O)=O                                            | 294.1 |
| NDNPHENO2    | [O]OC1(O)C(=CC2(OOC1C2ON(=O)=O)N(=O)=O)N(=O)=O                                           | 310.1 |
| NDNPHENOOH   | OOC1(O)C(=CC2(OOC1C2ON(=O)=O)N(=O)=O)N(=O)=O                                             | 311.1 |
| NMGLYOX      | O=CC(=O)CON(=O)=O                                                                        | 133.1 |
| NNBENZ3OHO   | O=N(=O)OC1C2(O)OOC1(N(=O)=O)C=C(O)C2(O)[O]                                               | 281.1 |
| NNBENZ3OHO2  | O=N(=O)OC1C2(O)OOC1(N(=O)=O)C=C(O)C2(O)O[O]                                              | 297.1 |
| NNBENZ3OHOOH | O=N(=O)OC1C2(O)OOC1(N(=O)=O)C=C(O)C2(O)OO                                                | 298.1 |
| NNBENZ4OHO   | O=N(=O)OC1C2(O)OOC1(N(=O)=O)C(O)=C(O)C2(O)[O]                                            | 297.1 |
| NNBENZ4OHO2  | O=N(=O)OC1C2(O)OOC1(N(=O)=O)C(O)=C(O)C2(O)O[O]                                           | 313.1 |
| NNBENZ4OHOOH | O=N(=O)OC1C2(O)OOC1(N(=O)=O)C(O)=C(O)C2(O)OO                                             | 314.1 |
| NNC_C2c      | OCC(=O)(OOC1(O)C(=CC2(OOC1C2ON(=O)=O)N(=O)=O)O)                                          | 340.2 |
| NNC_C4a      | O(C1(O)C(=CC2(OOC1C2ON(=O)=O)N(=O)=O)O)OC(=O)C=CC(=O)C=O                                 | 392.2 |
| NNC_C5a      | OC(C=O)C(=O)C=CC(=O)(OOC1(O)C(=CC2(OOC1C2ON(=O)=O)N(=O)=O)O)                             | 422.2 |
| NNC_DNP      | O(C1(O)C(=CC2(OOC1C2ON(=O)=O)N(=O)=O)O)OC1(O)C(=CC2(OOC1C2O)N(=O)=O)N(=O)=O              | 514.2 |
| NNC_MALc     | O(C1(O)C(=CC2(OOC1C2ON(=O)=O)N(=O)=O)O)OC1C(=O)OC(=O)C1O                                 | 396.2 |
| NNC_NBZb     | O(C1(O)C(=CC2(OOC1C2ON(=O)=O)N(=O)=O)O)OC1C(=O)C=CC(=O)C1ON(=O)=O                        | 451.2 |
| NNC_NCAT     | O(C1(O)C(=CC2(OOC1C2ON(=O)=O)N(=O)=O)O)OC1(O)C(=CC2(OOC1C2O)N(=O)=O)O                    | 485.2 |
| NNC_NDN      | O(C1(O)C(=CC2(OOC1C2ON(=O)=O)N(=O)=O)O)OC1(O)C(=CC2(OOC1C2ON(=O)=O)N(=O)=O)N(=O)=O       | 559.2 |

|            |                                                                                         |       |
|------------|-----------------------------------------------------------------------------------------|-------|
| NNC_NNC    | <chem>O(C1(O)C(=CC2(OOC1C2ON(=O)=O)N(=O)=O)OC1(O)C(=CC2(OOC1C2ON(=O)=O)N(=O)=O)O</chem> | 530.2 |
| NNC_PBZ    | <chem>O(C1(O)C(=CC2(OOC1C2ON(=O)=O)N(=O)=O)OC1C(=O)C=CC(=O)C1O</chem>                   | 406.2 |
| NNCATECO   | <chem>O=N(=O)OC1C2OOC1(C=C(O)C2([O])O)N(=O)=O</chem>                                    | 265.1 |
| NNCATECO2  | <chem>[O]OC1(O)C(=CC2(OOC1C2ON(=O)=O)N(=O)=O)O</chem>                                   | 281.1 |
| NNCATECOOH | <chem>OOC1(O)C(=CC2(OOC1C2ON(=O)=O)N(=O)=O)O</chem>                                     | 282.1 |
| NO3CH2CHO  | <chem>O=CCON(=O)=O</chem>                                                               | 105.0 |
| NO3CH2CO2H | <chem>OC(=O)CON(=O)=O</chem>                                                            | 121.0 |
| NO3CH2CO3  | <chem>[O]OC(=O)CON(=O)=O</chem>                                                         | 136.0 |
| NO3CH2CO3H | <chem>OOC(=O)CON(=O)=O</chem>                                                           | 137.0 |
| NO3CH2PAN  | <chem>O=C(CON(=O)=O)OON(=O)=O</chem>                                                    | 182.0 |
| NPHa_BZFU  | <chem>O(C1(O)C=CC2OOC1C2ON(=O)=O)OC1C(O)COC1=O</chem>                                   | 321.2 |
| NPHa_C2a   | <chem>O(C1(O)C=CC2OOC1C2ON(=O)=O)OC(=O)C=O</chem>                                       | 277.1 |
| NPHa_C2b   | <chem>O(C1(O)C=CC2OOC1C2ON(=O)=O)OCC=O</chem>                                           | 263.2 |
| NPHa_C2c   | <chem>OCC(=O)(OOC1(O)C=CC2OOC1C2ON(=O)=O)</chem>                                        | 279.2 |
| NPHa_C3a   | <chem>OC(C=O)C(=O)(OOC1(O)C=CC2OOC1C2ON(=O)=O)</chem>                                   | 307.2 |
| NPHa_C3DI  | <chem>O(C1(O)C=CC2OOC1C2ON(=O)=O)OC(C=O)C=O</chem>                                      | 291.2 |
| NPHa_C4a   | <chem>O(C1(O)C=CC2OOC1C2ON(=O)=O)OC(=O)C=CC(=O)C=O</chem>                               | 331.2 |
| NPHa_C5a   | <chem>OC(C=O)C(=O)C=CC(=O)(OOC1(O)C=CC2OOC1C2ON(=O)=O)</chem>                           | 361.2 |
| NPHa_C6a   | <chem>O(C1(O)C=CC2OOC1C2ON(=O)=O)Oc1ccccc1</chem>                                       | 297.2 |
| NPHa_CATE  | <chem>O(C1(O)C=CC2OOC1C2ON(=O)=O)Oc1ccccc1O</chem>                                      | 313.2 |
| NPHa_DNP   | <chem>O(C1(O)C=CC2OOC1C2ON(=O)=O)OC1(O)C(=CC2(OOC1C2O)N(=O)=O)N(=O)=O</chem>            | 453.2 |
| NPHa_EPX   | <chem>O(C1(O)C=CC2OOC1C2ON(=O)=O)OC(=O)C1OC1C=O</chem>                                  | 319.2 |
| NPHa_MALa  | <chem>O(C1(O)C=CC2OOC1C2ON(=O)=O)OC(=O)C=CC=O</chem>                                    | 303.2 |
| NPHa_MALb  | <chem>O(C1(O)C=CC2OOC1C2ON(=O)=O)OC(C=O)C(O)C=O</chem>                                  | 321.2 |
| NPHa_MALc  | <chem>O(C1(O)C=CC2OOC1C2ON(=O)=O)OC1C(=O)OC(=O)C1O</chem>                               | 335.2 |
| NPHa_NBZa  | <chem>O(C1(O)C=CC2OOC1C2ON(=O)=O)OC1C(=O)OCC1ON(=O)=O</chem>                            | 366.2 |
| NPHa_NBZb  | <chem>O(C1(O)C=CC2OOC1C2ON(=O)=O)OC1C(=O)C=CC(=O)C1ON(=O)=O</chem>                      | 390.2 |
| NPHa_NCAT  | <chem>O(C1(O)C=CC2OOC1C2ON(=O)=O)OC1(O)C(=CC2(OOC1C2O)N(=O)=O)O</chem>                  | 424.2 |
| NPHa_NDN   | <chem>O(C1(O)C=CC2OOC1C2ON(=O)=O)OC1(O)C(=CC2(OOC1C2ON(=O)=O)N(=O)=O)N(=O)=O</chem>     | 498.2 |
| NPHa_NNC   | <chem>O(C1(O)C=CC2OOC1C2ON(=O)=O)OC1(O)C(=CC2(OOC1C2ON(=O)=O)N(=O)=O)O</chem>           | 469.2 |
| NPHa_NPHa  | <chem>O(C1(O)C=CC2OOC1C2ON(=O)=O)OC1(O)C=CC2OOC1C2ON(=O)=O</chem>                       | 408.2 |
| NPHa_NPHb  | <chem>O(C1(O)C=CC2OOC1C2ON(=O)=O)Oc1ccccc1N(=O)=O</chem>                                | 342.2 |
| NPHa_PBZ   | <chem>O(C1(O)C=CC2OOC1C2ON(=O)=O)OC1C(=O)C=CC(=O)C1O</chem>                             | 345.2 |
| NPHa_PHEN  | <chem>O(C1(O)C=CC2OOC1C2ON(=O)=O)OC1(O)C=CC2OOC1C2O</chem>                              | 363.2 |
| NPHb_C2c   | <chem>OCC(=O)(OOC1ccccc1N(=O)=O)</chem>                                                 | 213.1 |
| NPHb_C4a   | <chem>O(c1ccccc1N(=O)=O)OC(=O)C=CC(=O)C=O</chem>                                        | 265.2 |
| NPHb_C5a   | <chem>OC(C=O)C(=O)C=CC(=O)(OOC1ccccc1N(=O)=O)</chem>                                    | 295.2 |
| NPHb_DNP   | <chem>O(c1ccccc1N(=O)=O)OC1(O)C(=CC2(OOC1C2O)N(=O)=O)N(=O)=O</chem>                     | 387.2 |
| NPHb_MALc  | <chem>O(c1ccccc1N(=O)=O)OC1C(=O)OC(=O)C1O</chem>                                        | 269.2 |
| NPHb_NBZb  | <chem>O(c1ccccc1N(=O)=O)OC1C(=O)C=CC(=O)C1ON(=O)=O</chem>                               | 324.2 |
| NPHb_NCAT  | <chem>O(c1ccccc1N(=O)=O)OC1(O)C(=CC2(OOC1C2O)N(=O)=O)O</chem>                           | 358.2 |
| NPHb_NDN   | <chem>O(c1ccccc1N(=O)=O)OC1(O)C(=CC2(OOC1C2ON(=O)=O)N(=O)=O)N(=O)=O</chem>              | 432.2 |
| NPHb_NNC   | <chem>O(c1ccccc1N(=O)=O)OC1(O)C(=CC2(OOC1C2ON(=O)=O)N(=O)=O)O</chem>                    | 403.2 |
| NPHb_NPHb  | <chem>O(c1ccccc1N(=O)=O)Oc1ccccc1N(=O)=O</chem>                                         | 276.2 |
| NPHb_PBZ   | <chem>O(c1ccccc1N(=O)=O)OC1C(=O)C=CC(=O)C1O</chem>                                      | 279.2 |
| NPHENIO    | <chem>O=N(=O)c1ccccc1[O]</chem>                                                         | 138.1 |

|             |                                                                  |       |
|-------------|------------------------------------------------------------------|-------|
| NPHEN1O2    | [O]Oc1cccc1N(=O)=O                                               | 154.1 |
| NPHEN1OOH   | OOc1cccc1N(=O)=O                                                 | 155.1 |
| NPHENO      | O=N(=O)OC1C2OOC1C([O])(O)C=C2                                    | 204.1 |
| NPHENO2     | [O]OC1(O)C=CC2OOC1C2ON(=O)=O                                     | 220.1 |
| NPHENOH     | O=N(=O)OC1C2OOC1C(O)(O)C=C2                                      | 205.1 |
| NPHENOOH    | OOC1(O)C=CC2OOC1C2ON(=O)=O                                       | 221.1 |
| OCCOHCOC    | OC(C[O])C=O                                                      | 89.1  |
| OCCOHCOC2   | OC(CO[O])C=O                                                     | 105.1 |
| OCCOHCOCOH  | OC(CO)C=O                                                        | 90.1  |
| OCCOHCOCOOH | OC(COO)C=O                                                       | 106.1 |
| OXOSORBACID | C(=CC=O)C=CC(=O)O                                                | 126.1 |
| PBZ_C2c     | OCC(=O)(OOC1C(=O)C=CC(=O)C1O)                                    | 216.1 |
| PBZ_C4a     | O(C1C(=O)C=CC(=O)C1O)OC(=O)C=CC(=O)C=O                           | 268.2 |
| PBZ_C5a     | OC(C=O)C(=O)C=CC(=O)(OOC1C(=O)C=CC(=O)C1O)                       | 298.2 |
| PBZ_DNP     | O(C1C(=O)C=CC(=O)C1O)OC1(O)C(=CC2(OOC1C2O)N(=O)=O)N(=O)=O        | 390.2 |
| PBZ_MALc    | O(C1C(=O)C=CC(=O)C1O)OC1C(=O)OC(=O)C1O                           | 272.2 |
| PBZ_NDN     | O(C1C(=O)C=CC(=O)C1O)OC1(O)C(=CC2(OOC1C2ON(=O)=O)N(=O)=O)N(=O)=O | 435.2 |
| PBZ_PBZ     | O(C1C(=O)C=CC(=O)C1O)OC1C(=O)C=CC(=O)C1O                         | 282.2 |
| PBZQ1OH     | O=c1ccc(=O)c(O)c1                                                | 124.1 |
| PBZQ3OH     | O=c1cc(O)c(=O)c(O)c1O                                            | 156.1 |
| PBZQCO      | O=C1C=CC(=O)C(O)C1=O                                             | 140.1 |
| PBZQO       | O=C1C=CC(=O)C(O)C1[O]                                            | 141.1 |
| PBZQO2      | [O]OC1C(=O)C=CC(=O)C1O                                           | 157.1 |
| PBZQOH      | O=C1C=CC(=O)C(O)C1O                                              | 142.1 |
| PBZQONE     | O=C1C=CC(=O)C=C1                                                 | 108.1 |
| PBZQOOH     | OOC1C(=O)C=CC(=O)C1O                                             | 158.1 |
| PC2         | O=CC(O)C=CC(C=O)(O[O])                                           | 159.1 |
| PHAN        | OCC(=O)OON(=O)=O                                                 | 137.0 |
| PHEN_BZFU   | O(C1(O)C=CC2OOC1C2O)OC1C(O)COC1=O                                | 276.2 |
| PHEN_C2a    | O(C1(O)C=CC2OOC1C2O)OC(=O)C=O                                    | 232.1 |
| PHEN_C2b    | O(C1(O)C=CC2OOC1C2O)OCC=O                                        | 218.2 |
| PHEN_C2c    | OCC(=O)(OOC1(O)C=CC2OOC1C2O)                                     | 234.2 |
| PHEN_C3a    | OC(C=O)C(=O)(OOC1(O)C=CC2OOC1C2O)                                | 262.2 |
| PHEN_C3DI   | O(C1(O)C=CC2OOC1C2O)OC(C=O)C=O                                   | 246.2 |
| PHEN_C4a    | O(C1(O)C=CC2OOC1C2O)OC(=O)C=CC(=O)C=O                            | 286.2 |
| PHEN_C5a    | OC(C=O)C(=O)C=CC(=O)(OOC1(O)C=CC2OOC1C2O)                        | 316.2 |
| PHEN_C6a    | O(C1(O)C=CC2OOC1C2O)Oc1cccc1                                     | 252.2 |
| PHEN_CATE   | O(C1(O)C=CC2OOC1C2O)Oc1cccc1O                                    | 268.2 |
| PHEN_DNP    | O(C1(O)C=CC2OOC1C2O)OC1(O)C(=CC2(OOC1C2O)N(=O)=O)N(=O)=O         | 408.2 |
| PHEN_EPX    | O(C1(O)C=CC2OOC1C2O)OC(=O)C1OC1C=O                               | 274.2 |
| PHEN_MALa   | O(C1(O)C=CC2OOC1C2O)OC(=O)C=CC=O                                 | 258.2 |
| PHEN_MALb   | O(C1(O)C=CC2OOC1C2O)OC(C=O)C(O)C=O                               | 276.2 |
| PHEN_MALc   | O(C1(O)C=CC2OOC1C2O)OC1C(=O)OC(=O)C1O                            | 290.2 |
| PHEN_NBZa   | O(C1(O)C=CC2OOC1C2O)OC1C(=O)OCC1ON(=O)=O                         | 321.2 |
| PHEN_NBZb   | O(C1(O)C=CC2OOC1C2O)OC1C(=O)C=CC(=O)C1ON(=O)=O                   | 345.2 |
| PHEN_NCAT   | O(C1(O)C=CC2OOC1C2O)OC1(O)C(=CC2(OOC1C2O)N(=O)=O)O               | 379.2 |

|           |                                                                              |       |
|-----------|------------------------------------------------------------------------------|-------|
| PHEN_NDN  | <chem>O(C1(O)C=CC2OOC1C2O)OC1(O)C(=CC2(OOC1C2ON(=O)=O)N(=O)=O)N(=O)=O</chem> | 453.2 |
| PHEN_NNC  | <chem>O(C1(O)C=CC2OOC1C2O)OC1(O)C(=CC2(OOC1C2ON(=O)=O)N(=O)=O)O</chem>       | 424.2 |
| PHEN_NPHb | <chem>O(C1(O)C=CC2OOC1C2O)Oc1ccccc1N(=O)=O</chem>                            | 297.2 |
| PHEN_PBZ  | <chem>O(C1(O)C=CC2OOC1C2O)OC1C(=O)C=CC(=O)C1O</chem>                         | 300.2 |
| PHEN_PHEN | <chem>O(C1(O)C=CC2OOC1C2O)OC1(O)C=CC2OOC1C2O</chem>                          | 318.2 |
| PHENO     | <chem>OC1C2OOC1C([O])(O)C=C2</chem>                                          | 159.1 |
| PHENO2    | <chem>[O]OC1(O)C=CC2OOC1C2O</chem>                                           | 175.1 |
| PHENOH    | <chem>OC1C2OOC1C(O)(O)C=C2</chem>                                            | 160.1 |
| PHENOL    | <chem>Oc1ccccc1</chem>                                                       | 94.1  |
| PHENOOH   | <chem>OOC1(O)C=CC2OOC1C2O</chem>                                             | 176.1 |
| R1bRO2    | <chem>O=CC(O)=CC(O[O])C(C=O)OO</chem>                                        | 191.1 |
| ROCS_O4_O | <chem>O=C1C2OC2C3OOC1C3(O)</chem>                                            | 158.1 |
| ROCS_O5_O | <chem>O=CC(=O)C(O)C1OC1C(O)=O</chem>                                         | 174.1 |
| ROCS_O6_O | <chem>O=C=CC(OO)C(=O)C(O)C(=O)O</chem>                                       | 190.1 |
| ROCS_O7_O | <chem>O=C(O)C(=O)C(O)C1OC1C(OO)=O</chem>                                     | 206.1 |
| ROCS_O8_O | <chem>O=C(O)C(=O)C(=O)CC(OO)C(=O)OO</chem>                                   | 222.1 |
| ROCS_O9_O | <chem>O=C(OO)C(O)C(O)C(=O)C(=O)C(=O)OO</chem>                                | 238.1 |

## Supplement S4: reduced mechanism - reactions

|    |                                                                                                                            |                                    |
|----|----------------------------------------------------------------------------------------------------------------------------|------------------------------------|
| 1  | HOCH2CHO + OH -> 8.000E-01 HOCH2CO3 + 2.000E-01 GLY + 2.000E-01 HO2                                                        | ARR 1.000E-11 0 0                  |
| 2  | HOCH2CHO -> CO + HCHO + 2.000E+00 HO2                                                                                      | EXTRA 91 2.792E-05 0.805 0.338 1.0 |
| 3  | HOCH2CHO + NO3 -> HNO3 + HOCH2CO3                                                                                          | ARR 1.400E-12 0 1860.00            |
| 4  | HOCH2CO3 + NO2 -> PHAN                                                                                                     | EXTRA 93 21 1.0                    |
| 5  | HOCH2CO3 + NO -> HCHO + HO2 + NO2                                                                                          | ARR 7.500E-12 0 -290.00            |
| 6  | HOCH2CO3 + NO3 -> HCHO + HO2 + NO2                                                                                         | ARR 4.002E-12 0 0                  |
| 7  | HOCH2CO3 + HO2 -> 4.100E-01 HOCH2CO3H + 1.500E-01 HOCH2CO2H + 1.500E-01 O3 + 4.400E-01 HCHO + 4.400E-01 HO2 + 4.400E-01 OH | ARR 5.200E-13 0 -980.00            |
| 8  | HOCH2CO3 -> 7.000E-01 HCHO + 7.000E-01 HO2 + 3.000E-01 HOCH2CO2H                                                           | RO2 1 ARR 1.000E-11 0 0            |
| 9  | PHAN -> HOCH2CO3 + NO2                                                                                                     | EXTRA 93 22 1.0                    |
| 10 | PHAN + OH -> CO + HCHO + NO2                                                                                               | ARR 1.120E-12 0 0                  |
| 11 | HOCH2CO2H + OH -> HCHO + HO2                                                                                               | ARR 2.730E-12 0 0                  |
| 12 | HOCH2CO3H -> HCHO + HO2 + OH                                                                                               | EXTRA 91 7.649E-06 0.682 0.279 1.0 |
| 13 | HOCH2CO3H + OH -> HOCH2CO3                                                                                                 | ARR 6.190E-12 0 0                  |
| 14 | GLYOOA -> 1.800E-01 GLYOO + 1.265E+00 CO + 8.200E-01 HO2 + 5.700E-01 OH + 1.250E-01 HCHO                                   | ARR 1.000E+06 0 0                  |
| 15 | HCOCO3 + NO -> CO + HO2 + NO2                                                                                              | ARR 7.500E-12 0 -290.00            |
| 16 | HCOCO3 + NO2 -> CO + HO2 + NO3                                                                                             | EXTRA 93 21 1.0                    |
| 17 | HCOCO3 + NO3 -> CO + HO2 + NO2                                                                                             | ARR 4.002E-12 0 0                  |
| 18 | HCOCO3 + HO2 -> 4.100E-01 HCOCO3H + 1.500E-01 HCOCO2H + 1.500E-01 O3 + 4.400E-01 CO + 4.400E-01 HO2 + 4.400E-01 OH         | ARR 5.200E-13 0 -980.00            |
| 19 | HCOCO3 -> 7.000E-01 CO + 7.000E-01 HO2 + 3.000E-01 HCOCO2H                                                                 | RO2 1 ARR 1.000E-11 0 0            |
| 20 | HCOCO3H + OH -> HCOCO3                                                                                                     | ARR 1.580E-11 0 0                  |
| 21 | HCOCO3H -> CO + HO2 + OH                                                                                                   | EXTRA 91 7.649E-06 0.682 0.279 1.0 |
| 22 | HCOCO3H -> CO + HO2 + OH                                                                                                   | EXTRA 91 2.792E-05 0.805 0.338 1.0 |
| 23 | HCOCO2H + OH -> CO + HO2                                                                                                   | ARR 1.230E-11 0 0                  |
| 24 | HCOCO2H -> CO + 2.000E+00 HO2                                                                                              | EXTRA 91 1.537E-04 0.170 0.208 1.0 |
| 25 | GLYOO + SO2 -> GLY + SO3                                                                                                   | ARR 7.000E-14 0 0                  |
| 26 | GLYOO + CO -> GLY                                                                                                          | ARR 1.200E-15 0 0                  |
| 27 | GLYOO + NO -> GLY + NO2                                                                                                    | ARR 1.000E-14 0 0                  |
| 28 | GLYOO + NO2 -> GLY + NO3                                                                                                   | ARR 1.000E-15 0 0                  |

## Supplement S5: reduced mechanism – species

| nom          | SMILES                                                                                    | molar weight<br>(g.mol <sup>-1</sup> ) |
|--------------|-------------------------------------------------------------------------------------------|----------------------------------------|
| BENZ3OH      | <chem>Oc1ccccc(O)c1O</chem>                                                               | 126.1                                  |
| BENZ4OH      | <chem>Oc1ccc(O)c(O)c1O</chem>                                                             | 142.1                                  |
| BENZENE      | <chem>c1ccccc1</chem>                                                                     | 78.1                                   |
| BZBIPERO2    | <chem>[O]OC1C=CC2OOC1C2O</chem>                                                           | 159.1                                  |
| BZo_O9_NO3   | <chem>O=C(OO)C(O)C(O)C(=O)C(ON(=O)=O)C(=O)OO</chem>                                       | 285.1                                  |
| BZo_RO2_O11  | <chem>O=C(OO)C(O)C(O)C(=O)C(O[O])C(=O)OO</chem>                                           | 255.1                                  |
| BZo_RO2_O7   | <chem>O=CC(O)C(O)C1OC1C(O[O])=O</chem>                                                    | 191.1                                  |
| BZo_RO2_O9   | <chem>O=C(O[O])C(O)C(O)C1OC1C(OO)=O</chem>                                                | 223.1                                  |
| BZo2_RO_O10  | <chem>O=C(OO)C(O)C(O)C(=O)C([O])C(=O)OO</chem>                                            | 239.1                                  |
| BZouni_O10_O | <chem>O=C(OO)C(=O)C(O)C(=O)C(OO)C(=O)OO</chem>                                            | 254.1                                  |
| BZouni_O6_O  | <chem>O=CC(=O)C(O)C1OC1C(OO)=O</chem>                                                     | 190.1                                  |
| C5uni_O6_O   | <chem>OOC=CC(=O)C(O)C(=O)OO</chem>                                                        | 178.1                                  |
| C6H6O3       | <chem>C1=CC(=O)C(C=C1)(O)O</chem>                                                         | 126.1                                  |
| C6H6O3_14    | <chem>C1(O)C(ON(=O)(=O))C=CC(=O)C1(O)(O)</chem>                                           | 205.1                                  |
| C6H6O4       | <chem>C(=CC=O)C=C(C(=O)O)O</chem>                                                         | 142.1                                  |
| C6H6O7       | <chem>C(=CC(C(=O)O)OO)C(=O)C(=O)O</chem>                                                  | 190.1                                  |
| C6H7O10N     | <chem>O=CC(=O)C(OO)C(OO)C(C=O)ON(=O)=O</chem>                                             | 253.1                                  |
| C6H7O12N     | <chem>C(=O)(C(C(C(C(=O)O)OO)OO)ON(=O)=O)C(=O)O</chem>                                     | 285.1                                  |
| CATEC1O      | <chem>[O]c1ccccc1O</chem>                                                                 | 109.1                                  |
| CATEC1O2     | <chem>[O]Oc1ccccc1O</chem>                                                                | 125.1                                  |
| CATECHOL     | <chem>Oc1ccccc1O</chem>                                                                   | 110.1                                  |
| NC4DCO2H     | <chem>O=CC(=CC(=O)O)N(=O)=O</chem>                                                        | 145.1                                  |
| NCATECHOL    | <chem>O=N(=O)c1ccc(O)c(O)c1</chem>                                                        | 155.1                                  |
| NNC_NNC      | <chem>O(C1(O)C(=CC2(OOC1C2ON(=O)=O)N(=O)=O)O)OC1(O)C(=CC2(OOC1C2ON(=O)=O)N(=O)=O)O</chem> | 530.2                                  |
| NNCATECO2    | <chem>[O]OC1(O)C(=CC2(OOC1C2ON(=O)=O)N(=O)=O)O</chem>                                     | 281.1                                  |
| NPHa_NPHa    | <chem>O(C1(O)C=CC2OOC1C2ON(=O)=O)OC1(O)C=CC2OOC1C2ON(=O)=O</chem>                         | 408.2                                  |
| NPHENO2      | <chem>[O]OC1(O)C=CC2OOC1C2ON(=O)=O</chem>                                                 | 220.1                                  |
| PHENOL       | <chem>Oc1ccccc1</chem>                                                                    | 94.1                                   |

## Supplement S6: Influence of non-ideality on simulated concentrations of chamber experiments

Gas–particle partitioning of semi-volatile organic compounds in aerosol models is commonly described using activity coefficients, which account for non-ideal interactions in the condensed phase. These coefficients quantify deviations from ideal solution behavior and directly affect effective saturation concentrations during condensation and evaporation. In the ideal case, activity coefficients are set to unity, implicitly assuming ideal mixing and neglecting intermolecular interactions within the particle phase. To assess the sensitivity of the results to this assumption, the chamber experiments are reproduced in SSH-aerosol using different activity-coefficient models, while retaining the quasi-explicit chemical scheme including the germinal diol pathway (Mech 2). In addition to the ideal formulation, simulations were performed using UNIFAC, which estimates activity coefficients based on group-contribution theory and accounts for non-ideal organic-organic interactions, and AIOMFAC, which extends this approach by including inorganic-organic interactions. AIOMFAC therefore provides a more comprehensive representation of aerosol-phase thermodynamics, particularly under conditions where inorganic species contribute significantly to particle composition. Figure S2 shows that using UNIFAC rather than assuming ideality tends to increase the simulated SOA concentrations by up to 15 %, whereas AIOMFAC leads to lower SOA concentrations, especially in the experiments with high concentrations of neutral seeds (experiments 5,6 and 14). The influence of non-ideality on SOA concentrations concerns mostly species originating from multi-hydroxylation, as they have higher volatility than those formed from autoxidation. These trends are consistent with those reported by Kim et al. (2019) when comparing ideal, UNIFAC, and AIOMFAC impacts. Overall, the influence of non-ideal gas–particle partitioning remains much smaller than that of introducing additional chemical pathways in the SOA formation scheme.

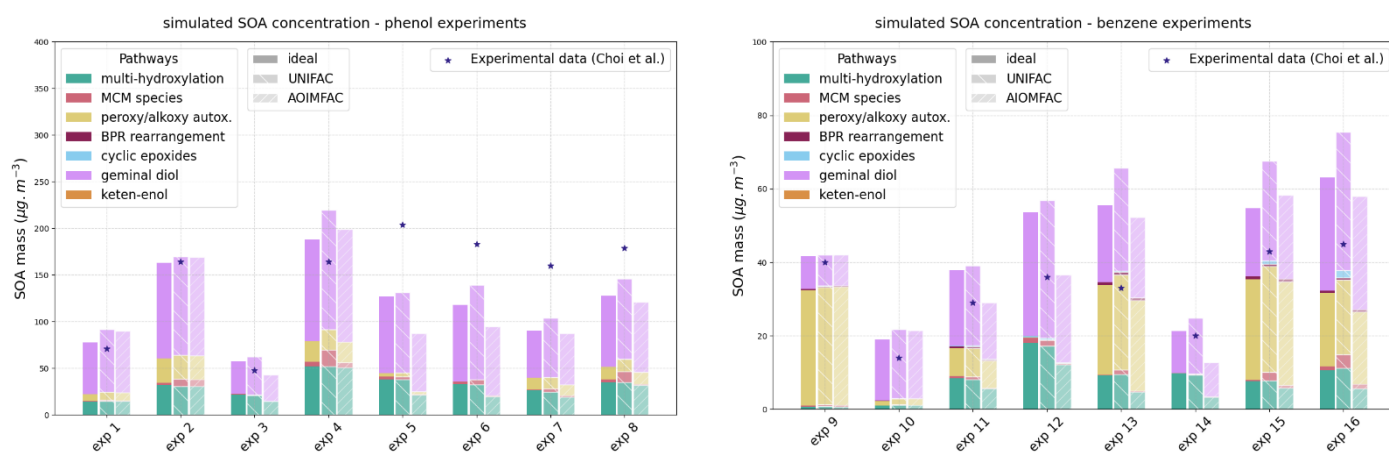

Figure S2: SOA concentrations simulated using Mech 2 and different activity models (ideal for the left bars, UNIFAC for the middle bars and AIOMFAC for the right bars) and comparison to experimental concentrations (stars on the graph). The left panel represents experiments using phenol as the precursor, while the right panel shows experiments using benzene.

## Supplement S7: Influence of nitrophenol saturation vapor pressure

In SSH-aerosol v2.0, saturation vapor pressures ( $P^{sat}$ ) are estimated using UManSysProp (Topping et al., 2016) and the SMILES structure associated with each species. For certain compounds,  $P^{sat}$  values are obtained experimentally and may differ from these calculated values: for nitrophenol, experiments conducted by Bannan et al. (2017) yielded a value of  $3.86E-5$  torr, also used in other modeling studies (Lanzafame et al., 2022) and compared to the  $6.63E-2$  torr estimated using UManSysProp. In order to evaluate the influence of the  $P^{sat}$  for nitrophenol on simulated SOA formation, additional simulations are performed using the value observed by Bannan et al. (2017).

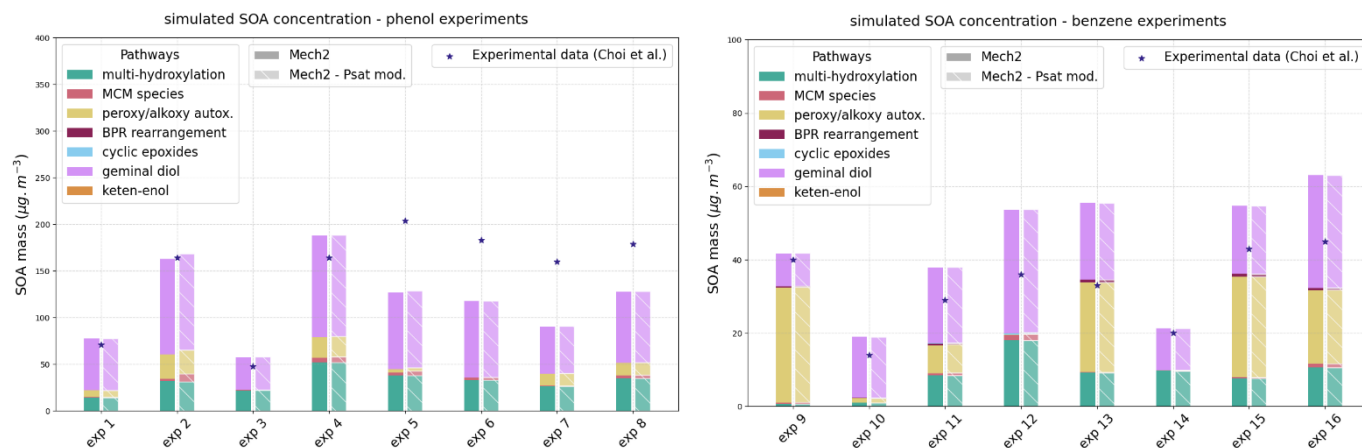

Figure S3: SOA concentrations simulated using Mech 2 with different PVS for nitrophenol compound and comparison to experimental concentrations (stars on the graph). The left panel represents experiments using phenol as the precursor, while the right panel shows experiments using benzene.

Overall, the impact of the modified  $P^{sat}$  of nitrophenol on simulated SOA concentrations remains small, for most experimental conditions, only minor changes in aerosol mass are observed (see Figure S3). However, more pronounced effects are obtained in simulations where OH and NO<sub>2</sub> concentrations are higher, where nitrophenol compounds contribute significantly to the organic aerosol fraction. Under these conditions, using the observed  $P^{sat}$  value slightly enhance the partitioning of nitrophenol and thus the contribution of the MCM pathway to SOA mass formation.

## Supplement S8: SOA composition in contrasted environments - 12 a.m.

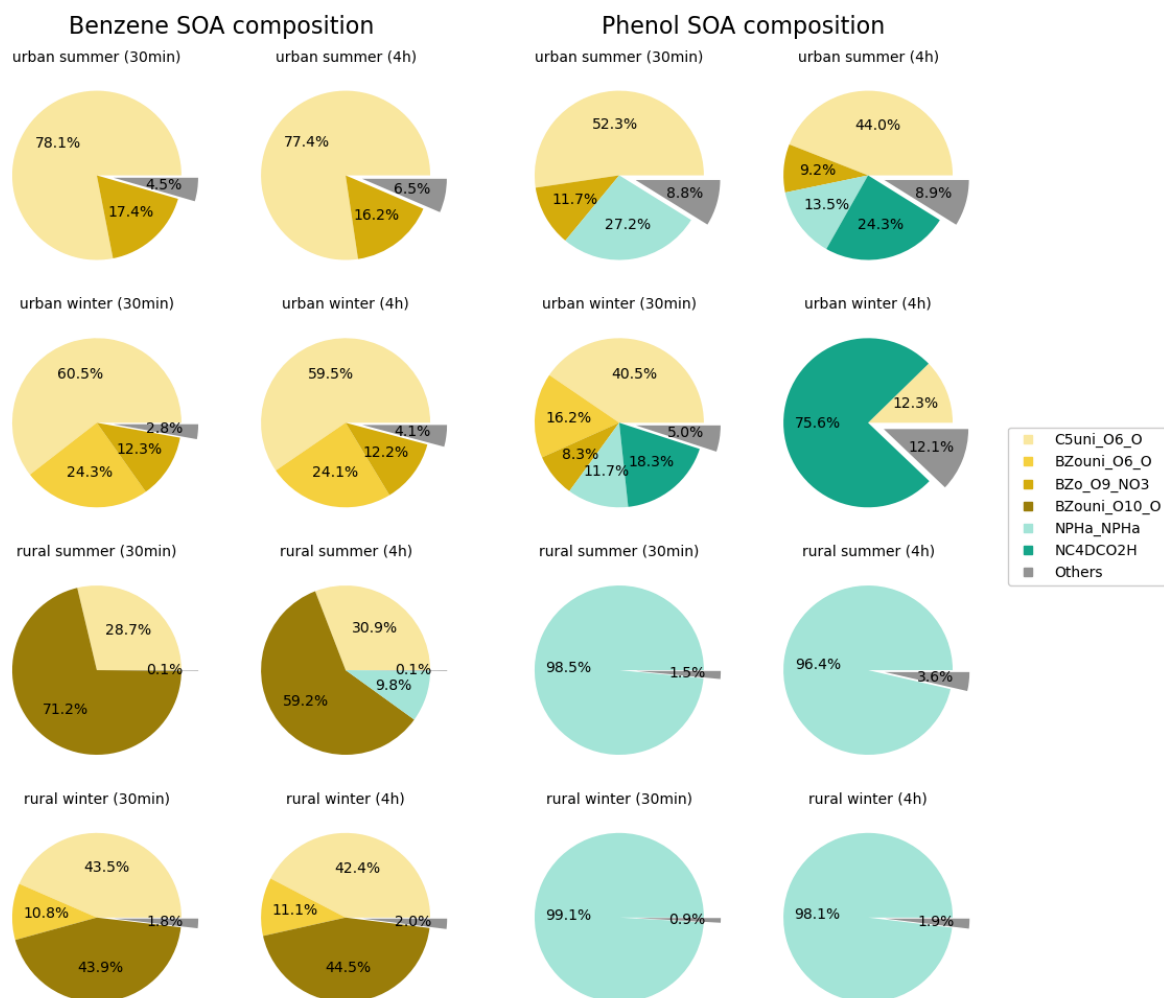

Figure S4: Benzene and phenol SOA composition after short (30 min) and longer (4 h) simulation times in a winter/summer and rural/urban conditions with initial time 12am. Compounds representing under 5 % of the SOA mass are aggregated in the "Others" category.

## Supplement S9: RO<sub>2</sub>/RO autoxidation scheme

Set of reactions applied to peroxy radicals in the autoAPRAM framework (Pichelstorfer et al., 2024).

RO<sub>2</sub> (H-shift + O<sub>2</sub> addition) -> RO<sub>2</sub>

RO<sub>2</sub> + NO -> RONO<sub>2</sub>

RO<sub>2</sub> + NO -> RO + NO<sub>2</sub>

RO<sub>2</sub> + NO -> RO + NO<sub>2</sub> -> RCHO + NO<sub>2</sub> + HO<sub>2</sub>

RO<sub>2</sub> + HO<sub>2</sub> -> ROOH

RO<sub>2</sub> + HO<sub>2</sub> -> RO + O<sub>2</sub> + OH

RO<sub>2</sub> (+ R'O<sub>2</sub>) -> RO<sub>5</sub>

RO<sub>2</sub> + R'O<sub>2</sub> -> ROOR'

RO<sub>2</sub> -> ROH

RO<sub>2</sub> (+ R'O<sub>2</sub>) -> RCHO

RO<sub>2</sub> (H-shift) -> RCHO

RO<sub>2</sub> (H-shift) -> C<sub>5</sub>RO<sub>2</sub> + CO

Set of reactions applied to the alkoxy radicals in the autoAPRAM framework (Pichelstorfer et al. 2024).

RO (H-shift + O<sub>2</sub> addition) -> RO<sub>2</sub>

RO (H-shift) -> RCHO

RO fragmentation -> C<sub>2</sub>-C<sub>4</sub> carbonyls

## References

- Bannan, T. J. and Booth, A. M. and Jones, B. T. and O'Meara, S. and Barley, M. H. and Riipinen, I. and Percival, C. J. and Topping, D. "Measured Saturation Vapor Pressures of Phenolic and Nitro-aromatic Compounds." *Environmental Science & Technology* 51, no. 7 (2017): 3922-3928.
- Jenkin, M. E. and Valorso, R. and Aumont, B. and Rickard, A. R. and Wallington, T. J. "Estimation of rate coefficients and branching ratios for gas-phase reactions of OH with aromatic organic compounds for use in automated mechanism construction." *Atmospheric Chemistry and Physics* 18, no. 13 (2018): 9329-9349.
- Kim, Y. and Sartelet, K. and Couvidat, F. "Modeling the effect of non-ideality, dynamic mass transfer and viscosity on SOA formation in a 3-D air quality model." *Atmospheric Chemistry and Physics* 19, no. 2 (2019): 1241-1261.
- Lanzafame, G.M. and Bessagnet, B. and Srivastava, D. and Jaffrezo, J.L. and Favez, O. and Albinet, A. and Couvidat, F. "Modelling aerosol molecular markers in a 3D air quality model: Focus on anthropogenic organic markers." *Science of The Total Environment* 835 (2022): 155360.
- Pichelstorfer, L. and Roldin, P. and Rissanen, M. and Hyttinen, N. and Garmash, O. and Xavier, C. and Zhou, P. and Clusius, P. and Foreback, B. and Almeida, T. G. and Deng, C. and Baykara, M. and Kurten, T. and Boy, M. "Towards Automated Inclusion of Autoxidation Chemistry in Models: From Precursors to Atmospheric Implications." *Environmental Science: Atmospheres* 4, no. 8 (2024): 879-896.
- Topping, D. and Barley, M. and Bane, M. K. and Higham, N. and Aumont, B. and Dingle, N. and McFiggans, G. "UManSysProp v1.0: an online and open-source facility for molecular property prediction and atmospheric aerosol calculations." *Geoscientific Model Development* 9, no. 2 (2016): 899-914.
